# Supplementary material
Source: PubMed Central journal article supplement (PMC4795233)
Supplement: ejhg201575x2.pdf [file ejhg201575x2.pdf]

## **SUPPLEMENTARY MATERIAL**

### **TABLE OF CONTENTS**

|                                                                                                                                   |           |
|-----------------------------------------------------------------------------------------------------------------------------------|-----------|
| <b>1. Spanish data</b>                                                                                                            |           |
| <b>1.1. Table with haplogroup frequencies and STR variances.....</b>                                                              | <b>2</b>  |
| <b>1.2. Haplogroup colour coding.....</b>                                                                                         | <b>3</b>  |
| <b>1.3. Median joining networks and descent clusters of Spanish surnames<br/>        based on SNPs and 15 STRs.....</b>           | <b>4</b>  |
| <br>                                                                                                                              |           |
| <b>2. Comparative data</b>                                                                                                        |           |
| <b>2.1. Median joining networks and descent clusters of comparative data<br/>        surnames, based on SNPs and 10 STRs.....</b> | <b>23</b> |
| <b>2.1.1. Spain.....</b>                                                                                                          | <b>23</b> |
| <b>2.1.2. Britain.....</b>                                                                                                        | <b>42</b> |
| <b>2.1.1. Ireland.....</b>                                                                                                        | <b>62</b> |
| <b>2.2. Descent surname clusters and estimated TMRCA ages.....</b>                                                                | <b>73</b> |
| <b>2.2.1. Table 1 Suppl. Material: Spain.....</b>                                                                                 | <b>73</b> |
| <b>2.2.2. Table 2 Suppl. Material: Britain.....</b>                                                                               | <b>74</b> |
| <b>2.2.3. Table 3 Suppl. Material: Ireland.....</b>                                                                               | <b>76</b> |

**Table summarising the number of samples per surname and control population, their different haplogroup frequencies and STR variance values of the dominant haplogroup**

| Surname   | N    | E1b-M123 |       | E1b-M34 |       | E1b-M35 |       | E1b-M78 |       | E1b-M81 |       | E-M96 |       | G-M201 |       | H-M213 |       | I2-M26 |       | I-M170 |       | J1-M62 |       | J2-M172 |       | J-M304 |       | K-M9 |       | L-M22 |       | P-92R7 |       | R1a-1573 |       | R1b-M269 |       | T-M70 |       |
|-----------|------|----------|-------|---------|-------|---------|-------|---------|-------|---------|-------|-------|-------|--------|-------|--------|-------|--------|-------|--------|-------|--------|-------|---------|-------|--------|-------|------|-------|-------|-------|--------|-------|----------|-------|----------|-------|-------|-------|
|           |      | n        | %     | n       | %     | n       | %     | n       | %     | n       | %     | n     | %     | n      | %     | n      | %     | n      | %     | n      | %     | n      | %     | n       | %     | n      | %     | n    | %     | n     | %     | n      | %     | n        | %     | n        | %     | n     | %     |
| Aguirre   | 43   | 0        | 0     | 0       | 0     | 0       | 0     | 1       | 0,023 | 0       | 0     | 0     | 0     | 2      | 0,047 | 0      | 0     | 0      | 0     | 2      | 0,047 | 0      | 0     | 2       | 0,047 | 0      | 0     | 0    | 0     | 0     | 0     | 0      | 1     | 0,023    | 34    | 0,791    | 1     | 0,023 |       |
| Albiol    | 45   | 0        | 0     | 0       | 0     | 0       | 0     | 0       | 0     | 0       | 0     | 0     | 0     | 0      | 0     | 0      | 0     | 0      | 0     | 0      | 0     | 0      | 14    | 0,311   | 0     | 0      | 0     | 0    | 0     | 0     | 0     | 0      | 0     | 0        | 0     | 31       | 0,689 | 0     | 0     |
| Alegre    | 46   | 0        | 0     | 0       | 0     | 0       | 0     | 1       | 0,022 | 3       | 0,065 | 1     | 0,022 | 2      | 0,043 | 0      | 0     | 1      | 0,022 | 2      | 0,043 | 0      | 0     | 0       | 0     | 2      | 0,043 | 0    | 0     | 0     | 0     | 0      | 0     | 0        | 0     | 34       | 0,739 | 0     | 0     |
| Andreu    | 43   | 0        | 0     | 0       | 0     | 0       | 0     | 8       | 0,186 | 1       | 0,023 | 0     | 0     | 2      | 0,047 | 0      | 0     | 4      | 0,093 | 2      | 0,047 | 0      | 0     | 3       | 0,07  | 1      | 0,023 | 0    | 0     | 0     | 0     | 0      | 0     | 0        | 22    | 0,512    | 0     | 0     |       |
| Ansotegui | 19   | 0        | 0     | 0       | 0     | 0       | 0     | 0       | 0     | 0       | 0     | 0     | 0     | 0      | 0     | 0      | 0     | 0      | 0     | 0      | 0     | 0      | 0     | 0       | 0     | 0      | 0     | 0    | 0     | 0     | 0     | 0      | 0     | 19       | 1     | 0        | 0     |       |       |
| Artola    | 33   | 0        | 0     | 0       | 0     | 0       | 0     | 0       | 0     | 0       | 0     | 0     | 0     | 0      | 0     | 0      | 0     | 0      | 0     | 0      | 0     | 0      | 0     | 0       | 0     | 0      | 0     | 0    | 0     | 0     | 0     | 0      | 0     | 33       | 1     | 0        | 0     |       |       |
| Baigorri  | 22   | 0        | 0     | 0       | 0     | 0       | 0     | 0       | 0     | 0       | 0     | 0     | 0     | 0      | 0     | 0      | 0     | 5      | 0,227 | 0      | 0     | 0      | 0     | 0       | 0     | 0      | 0     | 0    | 0     | 0     | 0     | 0      | 0     | 17       | 0,773 | 0        | 0     |       |       |
| Balaguer  | 37   | 0        | 0     | 0       | 0     | 0       | 0     | 1       | 0,027 | 1       | 0,027 | 2     | 0,054 | 10     | 0,27  | 0      | 0     | 0      | 0     | 1      | 0,027 | 0      | 0     | 2       | 0,054 | 1      | 0,027 | 0    | 0     | 0     | 0     | 0      | 1     | 0,027    | 18    | 0,486    | 0     | 0     |       |
| Bengochea | 31   | 0        | 0     | 0       | 0     | 0       | 0     | 0       | 0     | 0       | 0     | 0     | 0     | 0      | 0     | 0      | 1     | 0,032  | 0     | 0      | 0     | 0      | 0     | 0       | 0     | 0      | 0     | 0    | 0     | 0     | 0     | 0      | 0     | 30       | 0,968 | 0        | 0     |       |       |
| Bennasar  | 20   | 0        | 0     | 0       | 0     | 0       | 0     | 0       | 0     | 0       | 0     | 0     | 0     | 0      | 0     | 0      | 0     | 0      | 0     | 0      | 0     | 0      | 0     | 0       | 0     | 0      | 0     | 0    | 0     | 0     | 0     | 0      | 20    | 1        | 0     | 0        |       |       |       |
| Bibiloni  | 28   | 0        | 0     | 0       | 0     | 0       | 0     | 0       | 0     | 0       | 0     | 0     | 0     | 0      | 0     | 0      | 1     | 0,036  | 0     | 0      | 0     | 0      | 26    | 0,929   | 0     | 0      | 0     | 0    | 0     | 0     | 0     | 0      | 0     | 1        | 0,036 | 0        | 0     |       |       |
| Boluda    | 20   | 0        | 0     | 0       | 0     | 0       | 0     | 0       | 17    | 0,85    | 0     | 0     | 0     | 0      | 0     | 0      | 0     | 0      | 0     | 0      | 0     | 0      | 0     | 0       | 0     | 0      | 0     | 0    | 0     | 0     | 0     | 0      | 3     | 0,15     | 0     | 0        |       |       |       |
| Cadenas   | 41   | 0        | 0     | 0       | 0     | 0       | 0     | 0       | 0     | 0       | 0     | 0     | 0     | 0      | 0     | 0      | 0     | 0      | 0     | 2      | 0,049 | 0      | 0     | 1       | 0,024 | 0      | 0     | 0    | 0     | 0     | 0     | 0      | 0     | 0        | 38    | 0,927    | 0     | 0     |       |
| Castell   | 68   | 0        | 0     | 0       | 0     | 0       | 0     | 0       | 1     | 0,015   | 0     | 0     | 1     | 0,015  | 0     | 0      | 1     | 0,015  | 3     | 0,044  | 0     | 0      | 28    | 0,412   | 0     | 0      | 0     | 0    | 0     | 0     | 0     | 0      | 0     | 0        | 34    | 0,5      | 0     | 0     |       |
| Diez      | 108  | 1        | 0,009 | 0       | 0     | 0       | 0     | 1       | 0,009 | 18      | 0,167 | 0     | 0     | 7      | 0,065 | 0      | 0     | 0      | 0     | 2      | 0,019 | 0      | 0     | 8       | 0,074 | 1      | 0,009 | 0    | 1     | 0,009 | 0     | 2      | 0,019 | 64       | 0,593 | 3        | 0,028 |       |       |
| Fernandez | 77   | 0        | 0     | 1       | 0,013 | 0       | 0     | 3       | 0,039 | 5       | 0,065 | 0     | 0     | 5      | 0,065 | 1      | 0,013 | 2      | 0,026 | 6      | 0,078 | 0      | 0     | 2       | 0,026 | 4      | 0,052 | 0    | 0     | 0     | 1     | 0,013  | 1     | 0,013    | 45    | 0,584    | 1     | 0,013 |       |
| Gordon    | 43   | 0        | 0     | 0       | 0     | 0       | 0     | 3       | 0,07  | 0       | 0     | 0     | 0     | 0      | 0     | 0      | 0     | 0      | 10    | 0,233  | 0     | 0      | 1     | 0,023   | 0     | 0      | 0     | 0    | 0     | 0     | 1     | 0,023  | 25    | 0,581    | 3     | 0,07     |       |       |       |
| Granell   | 53   | 0        | 0     | 0       | 0     | 0       | 0     | 3       | 0,057 | 1       | 0,019 | 0     | 0     | 4      | 0,075 | 0      | 0     | 0      | 0     | 3      | 0,057 | 0      | 0     | 0       | 0     | 0      | 0     | 0    | 0     | 0     | 0     | 0      | 0     | 42       | 0,792 | 0        | 0     |       |       |
| Herrero   | 49   | 0        | 0     | 1       | 0,02  | 0       | 0     | 1       | 0,02  | 2       | 0,041 | 0     | 0     | 3      | 0,061 | 0      | 0     | 2      | 0,041 | 3      | 0,061 | 4      | 0,082 | 4       | 0,082 | 0      | 0     | 0    | 0     | 0     | 0     | 0      | 0     | 29       | 0,592 | 0        | 0     |       |       |
| Huguet    | 37   | 1        | 0,027 | 0       | 0     | 0       | 0     | 0       | 0     | 1       | 0,027 | 0     | 0     | 3      | 0,081 | 0      | 0     | 1      | 0,027 | 0      | 0     | 0      | 1     | 0,027   | 1     | 0,027  | 0     | 0    | 0     | 0     | 0     | 0      | 0     | 29       | 0,784 | 0        | 0     |       |       |
| Ibarra    | 42   | 0        | 0     | 0       | 0     | 0       | 0     | 1       | 0,024 | 1       | 0,024 | 0     | 0     | 0      | 0     | 0      | 0     | 1      | 0,024 | 2      | 0,048 | 0      | 0     | 2       | 0,048 | 0      | 0     | 0    | 0     | 0     | 1     | 0,024  | 1     | 0,024    | 33    | 0,786    | 0     | 0     |       |
| Japon     | 22   | 0        | 0     | 0       | 0     | 0       | 0     | 0       | 0     | 0       | 0     | 0     | 0     | 0      | 0     | 0      | 0     | 0      | 0     | 0      | 0     | 0      | 1     | 0,045   | 0     | 0      | 0     | 0    | 0     | 3     | 0,136 | 0      | 0     | 18       | 0,818 | 0        | 0     |       |       |
| Juarez    | 55   | 1        | 0,018 | 2       | 0,036 | 1       | 0,018 | 1       | 0,018 | 2       | 0,036 | 0     | 0     | 0      | 0     | 0      | 3     | 0,055  | 3     | 0,055  | 0     | 0      | 3     | 0,055   | 3     | 0,055  | 0     | 0    | 0     | 0     | 0     | 1      | 0,018 | 34       | 0,618 | 1        | 0,018 |       |       |
| Marques   | 51   | 0        | 0     | 2       | 0,039 | 0       | 0     | 3       | 0,059 | 2       | 0,039 | 1     | 0,02  | 4      | 0,078 | 0      | 0     | 3      | 0,059 | 3      | 0,059 | 0      | 0     | 0       | 0     | 0      | 0     | 0    | 0     | 0     | 0     | 1      | 0,02  | 32       | 0,627 | 0        | 0     |       |       |
| Martinez  | 114  | 0        | 0     | 1       | 0,009 | 0       | 0     | 2       | 0,018 | 1       | 0,009 | 2     | 0,018 | 6      | 0,053 | 0      | 0     | 2      | 0,018 | 6      | 0,053 | 0      | 0     | 7       | 0,061 | 2      | 0,018 | 0    | 1     | 0,009 | 0     | 0      | 0     | 81       | 0,711 | 3        | 0,026 |       |       |
| Mateos    | 66   | 0        | 0     | 1       | 0,015 | 0       | 0     | 2       | 0,03  | 4       | 0,061 | 0     | 0     | 6      | 0,091 | 0      | 0     | 0      | 0     | 3      | 0,045 | 0      | 0     | 3       | 0,045 | 0      | 0     | 0    | 0     | 2     | 0,03  | 7      | 0,106 | 38       | 0,576 | 0        | 0     |       |       |
| Moliner   | 65   | 0        | 0     | 0       | 0     | 0       | 0     | 2       | 0,031 | 4       | 0,062 | 6     | 0,092 | 1      | 0,015 | 0      | 0     | 14     | 0,215 | 0      | 0     | 0      | 2     | 0,031   | 0     | 0      | 0     | 0    | 0     | 2     | 0,031 | 34     | 0,523 | 0        | 0     |          |       |       |       |
| Nortes    | 18   | 0        | 0     | 0       | 0     | 0       | 0     | 0       | 0     | 0       | 0     | 0     | 0     | 0      | 0     | 0      | 0     | 0      | 0     | 0      | 0     | 0      | 0     | 0       | 0     | 0      | 0     | 0    | 0     | 0     | 0     | 0      | 18    | 1        | 0     | 0        |       |       |       |
| Olaizola  | 40   | 0        | 0     | 0       | 0     | 0       | 0     | 0       | 0     | 0       | 0     | 0     | 0     | 0      | 0     | 0      | 0     | 0      | 0     | 0      | 0     | 0      | 0     | 0       | 0     | 0      | 0     | 1    | 0,025 | 0     | 0     | 39     | 0,975 | 0        | 0     |          |       |       |       |
| Pascual   | 41   | 0        | 0     | 0       | 0     | 1       | 0,024 | 0       | 0     | 0       | 0     | 0     | 0     | 0      | 0     | 0      | 0     | 0      | 0     | 0      | 0     | 2      | 0,049 | 0       | 0     | 0      | 0     | 0    | 0     | 0     | 0     | 0      | 0     | 38       | 0,927 | 0        | 0     |       |       |
| Quevedo   | 42   | 0        | 0     | 0       | 0     | 0       | 0     | 1       | 0,024 | 5       | 0,119 | 1     | 0,024 | 0      | 0     | 0      | 0     | 2      | 0,048 | 0      | 0     | 0      | 8     | 0,19    | 1     | 0,024  | 0     | 0    | 0     | 0     | 0     | 0      | 0     | 24       | 0,571 | 0        | 0     |       |       |
| Renau     | 53   | 0        | 0     | 0       | 0     | 0       | 0     | 0       | 0     | 0       | 0     | 0     | 0     | 1      | 0,019 | 0      | 0     | 2      | 0,038 | 2      | 0,038 | 0      | 0     | 0       | 1     | 0,019  | 0     | 0    | 0     | 0     | 0     | 0      | 0     | 47       | 0,887 | 0        | 0     |       |       |
| Ribalta   | 44   | 0        | 0     | 0       | 0     | 0       | 0     | 0       | 0     | 0       | 0     | 0     | 0     | 0      | 0     | 0      | 6     | 0,136  | 0     | 0      | 0     | 0      | 0     | 12      | 0,273 | 0      | 0     | 0    | 0     | 0     | 0     | 0      | 0     | 26       | 0,591 | 0        | 0     |       |       |
| Rubio     | 93   | 0        | 0     | 2       | 0,022 | 2       | 0,022 | 2       | 0,022 | 3       | 0,032 | 0     | 0     | 1      | 0,011 | 0      | 0     | 1      | 0,011 | 4      | 0,043 | 0      | 0     | 10      | 0,108 | 3      | 0,032 | 0    | 0     | 0     | 0     | 0      | 0     | 64       | 0,688 | 1        | 0,011 |       |       |
| Tirado    | 39   | 0        | 0     | 1       | 0,026 | 0       | 0     | 4       | 0,103 | 1       | 0,026 | 0     | 0     | 1      | 0,026 | 0      | 0     | 1      | 0,026 | 1      | 0,026 | 0      | 0     | 5       | 0,128 | 1      | 0,026 | 0    | 0     | 0     | 1     | 0,026  | 0     | 22       | 0,564 | 1        | 0,026 |       |       |
| Valbuena  | 57   | 0        | 0     | 1       | 0,018 | 0       | 0     | 1       | 0,018 | 0       | 0     | 0     | 0     | 2      | 0,035 | 0      | 0     | 0      | 0     | 0      | 0     | 0      | 2     | 0,035   | 0     | 0      | 0     | 0    | 0     | 0     | 1     | 0,018  | 45    | 0,789    | 5     | 0,088    |       |       |       |
| Villaruel | 61   | 0        | 0     | 0       | 0     | 0       | 0     | 4       | 0,066 | 8       | 0,131 | 0     | 0     | 0      | 0     | 0      | 16    | 0,262  | 0     | 0      | 0     | 0      | 5     | 0,082   | 1     | 0,016  | 0     | 0    | 0     | 0     | 1     | 0,016  | 26    | 0,426    | 0     | 0        |       |       |       |
| Controls  | 355  | 0        | 0     | 10      | 0,095 | 0       | 0     | 9       | 0,067 | 11      | 0,083 | 0     | 0     | 6      | 0,066 | 1      | 0,006 | 11     | 0,08  | 12     | 0,096 | 0      | 0     | 19      | 0,173 | 8      | 0,075 | 1    | 0,013 | 1     | 0,013 | 2      | 0,019 | 14       | 0,118 | 241      | 2,013 | 9     | 0,083 |
| Total     | 2121 | 3        | 0,001 | 22      | 0,01  | 4       | 0,002 | 54      | 0,025 | 92      | 0,043 | 13    | 0,006 | 67     | 0,032 | 2      | 9E-04 | 80     | 0,038 | 72     | 0,034 | 4      | 0,002 | 161     | 0,076 | 42     | 0,02  | 1    | 5E-04 | 3     | 0,001 | 11     | 0,005 | 34       | 0,016 | 1428     | 0,673 | 28    | 0,013 |

## MEDIAN-JOINING NETWORKS

NETWORKS OF SPANISH SURNAMES BASED ON SNPs AND 15 STRs, SHOWING ALL DESCENT CLUSTERS (IN ALPHABETICAL ORDER).

(Networks of the Spanish control samples are located at the end)

| <u>Haplogroups</u>                                                                          |                                                                                              |                                                                                             |                                                                                              |
|---------------------------------------------------------------------------------------------|----------------------------------------------------------------------------------------------|---------------------------------------------------------------------------------------------|----------------------------------------------------------------------------------------------|
|  A*        |  I2-M26     |  E1b-M81   |  G-M201   |
|  R1b-M269  |  I-M170     |  E1b-M78   |  H-M213   |
|  J1-M62  |  R1a-1532 |  E1b-M34 |  K-M9   |
|  J2-M172 |  T-M70    |  E-M96   |  L-M22  |
|  J-M304  |  E1b-M123 |  E1b-M35 |  P-92R7 |

Category: Frequent

**Aguirre**

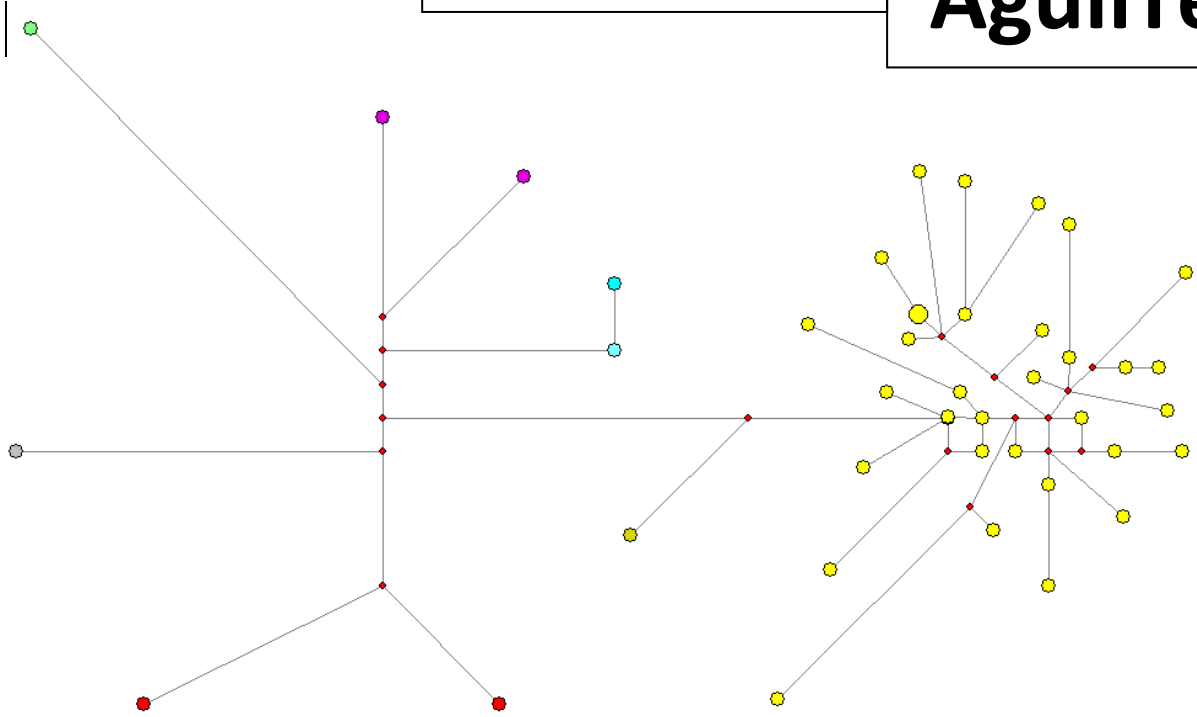

**Albiol**

Category: Very Rare

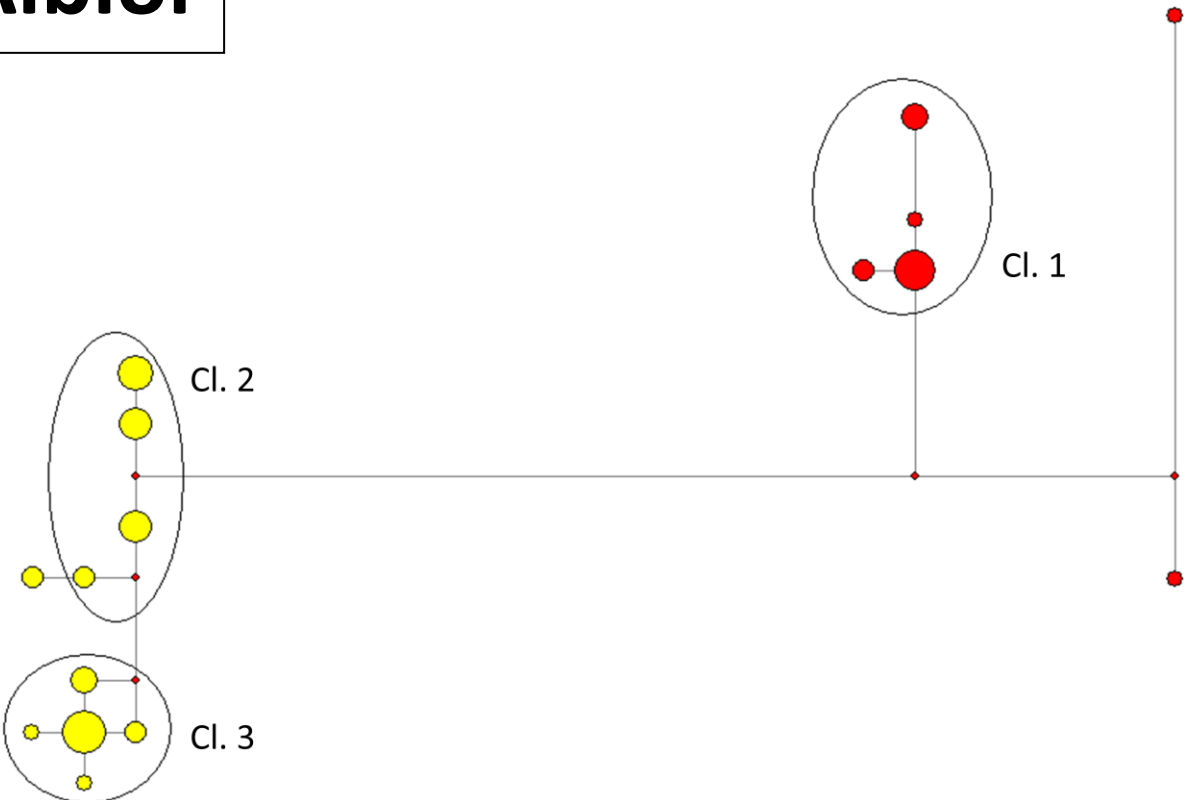

# Alegre

Category: Medium

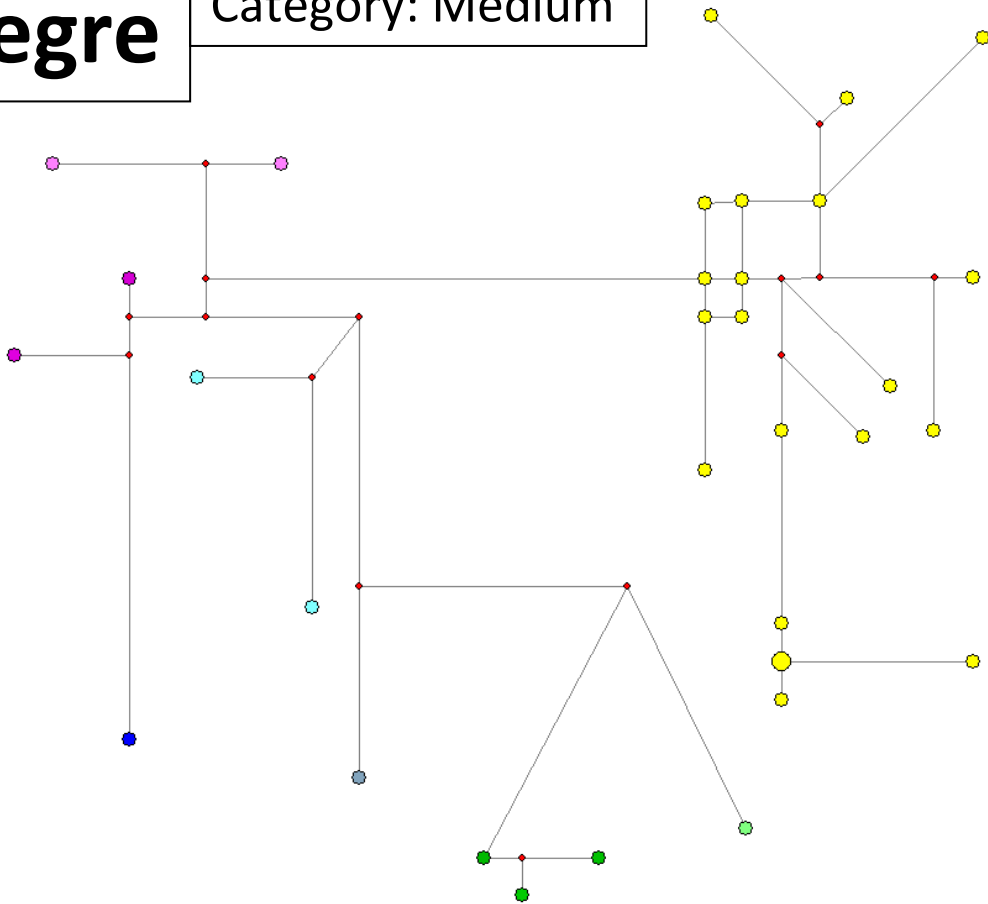

# Andreu

Category: Frequent

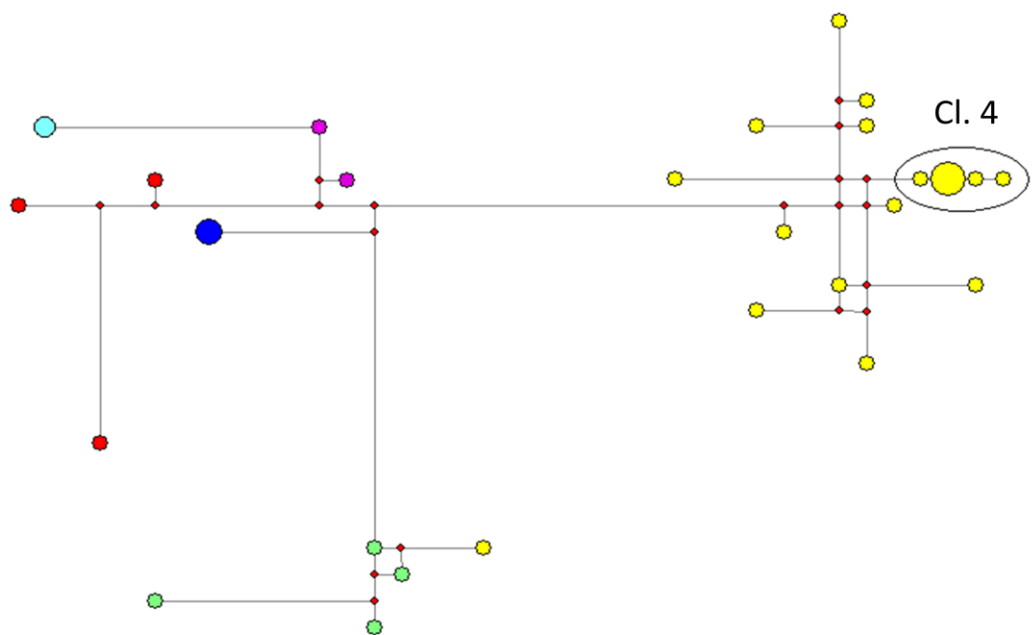

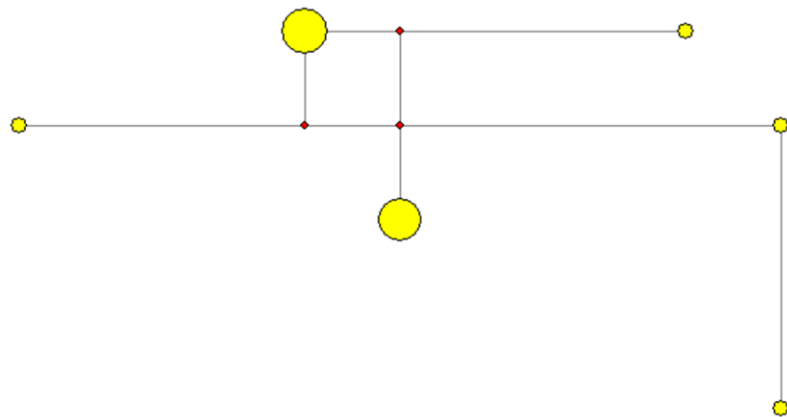

Category: Very Rare

# Ansotegui / Ansuategui

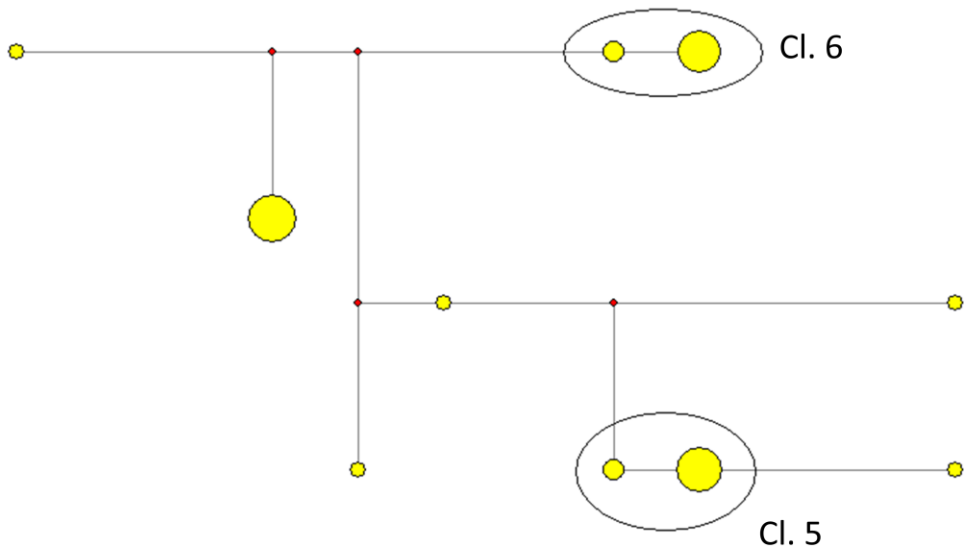

# Artola

Category: Very Rare

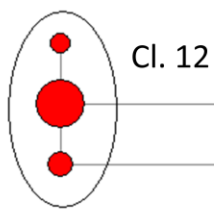

Category: Very Rare

# Babiloni / Bibiloni

Category: Very Rare

# Baigorri

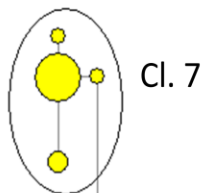

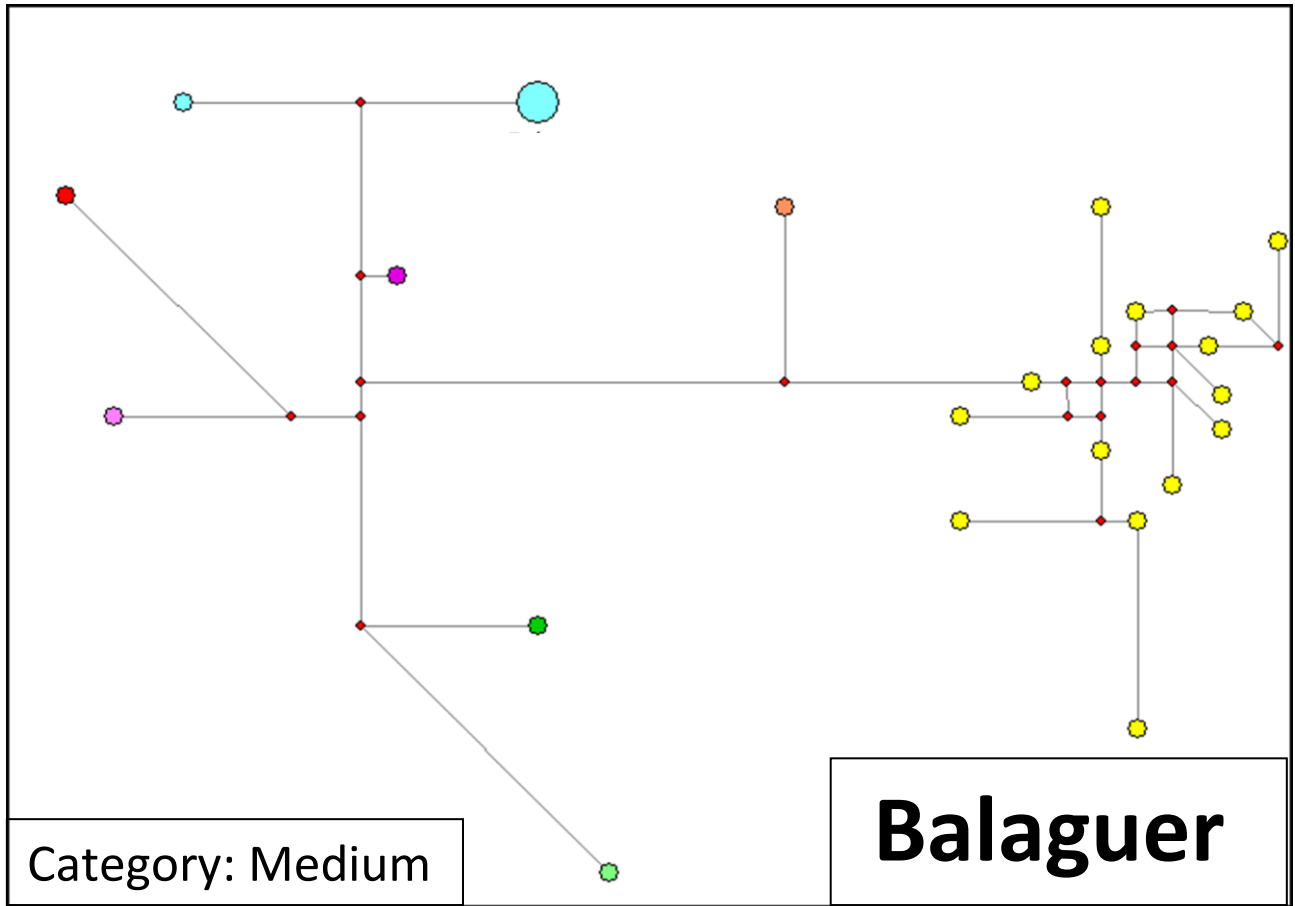

**Balaguer**

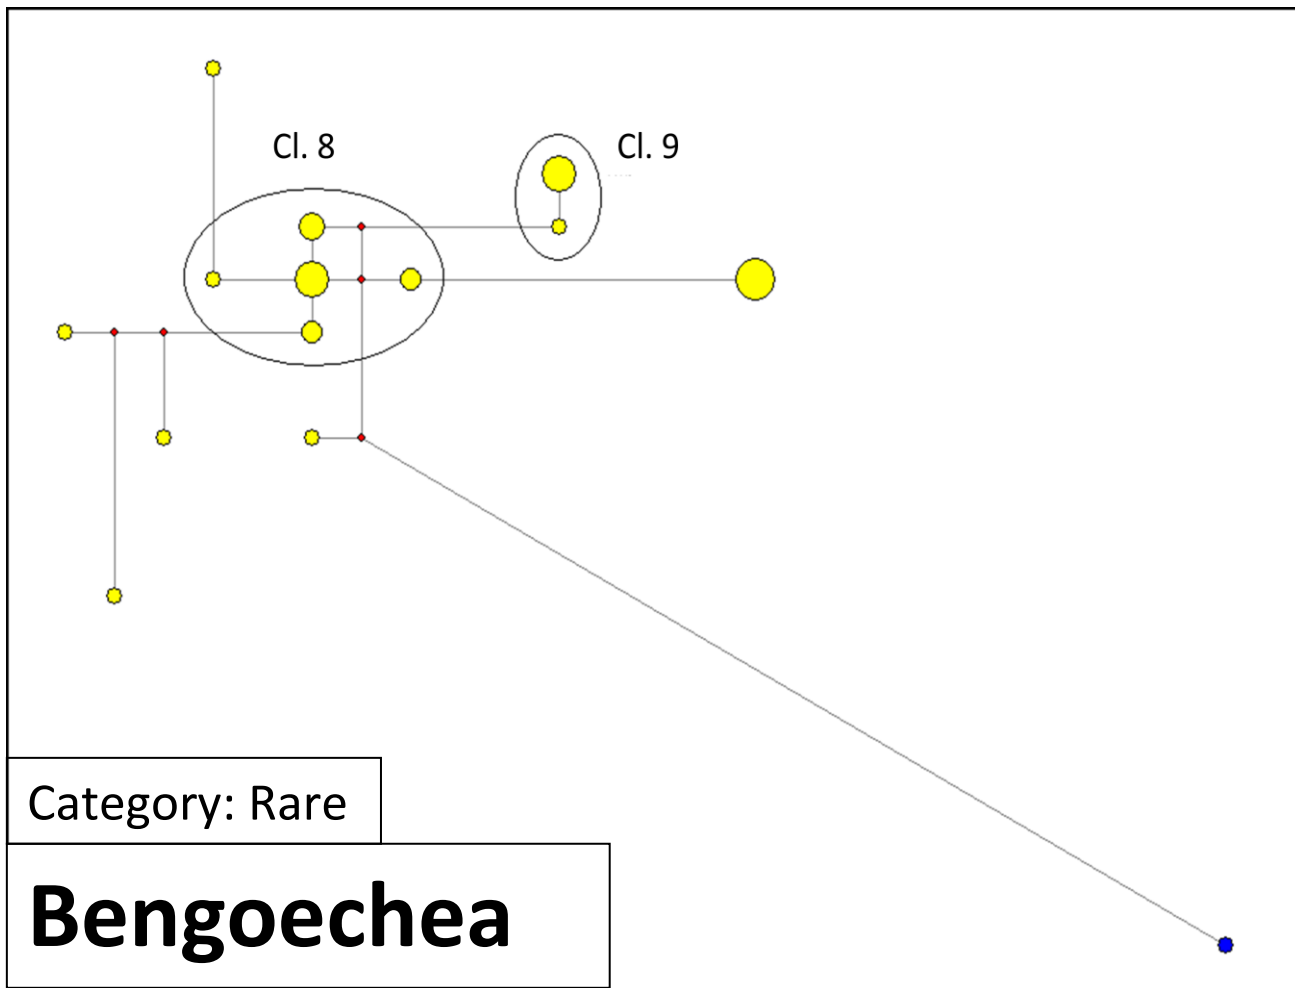

**Bengoechea**



# Bennasar

Category: Very Rare

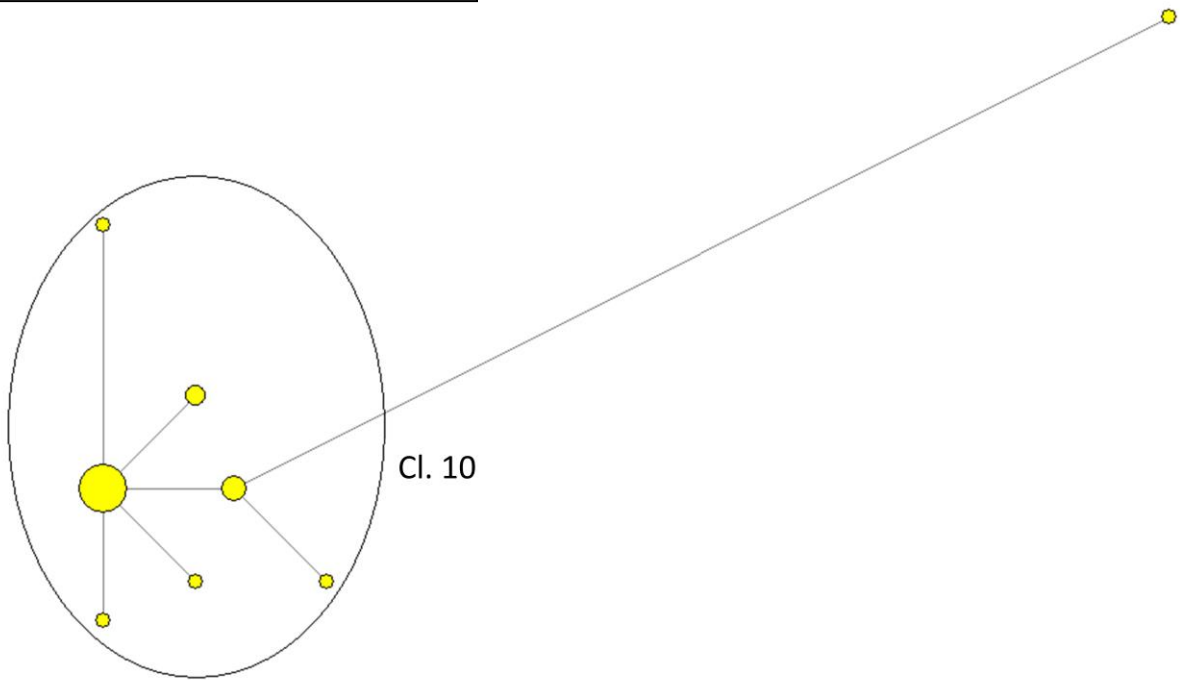

Category: Very Rare

# Boluda

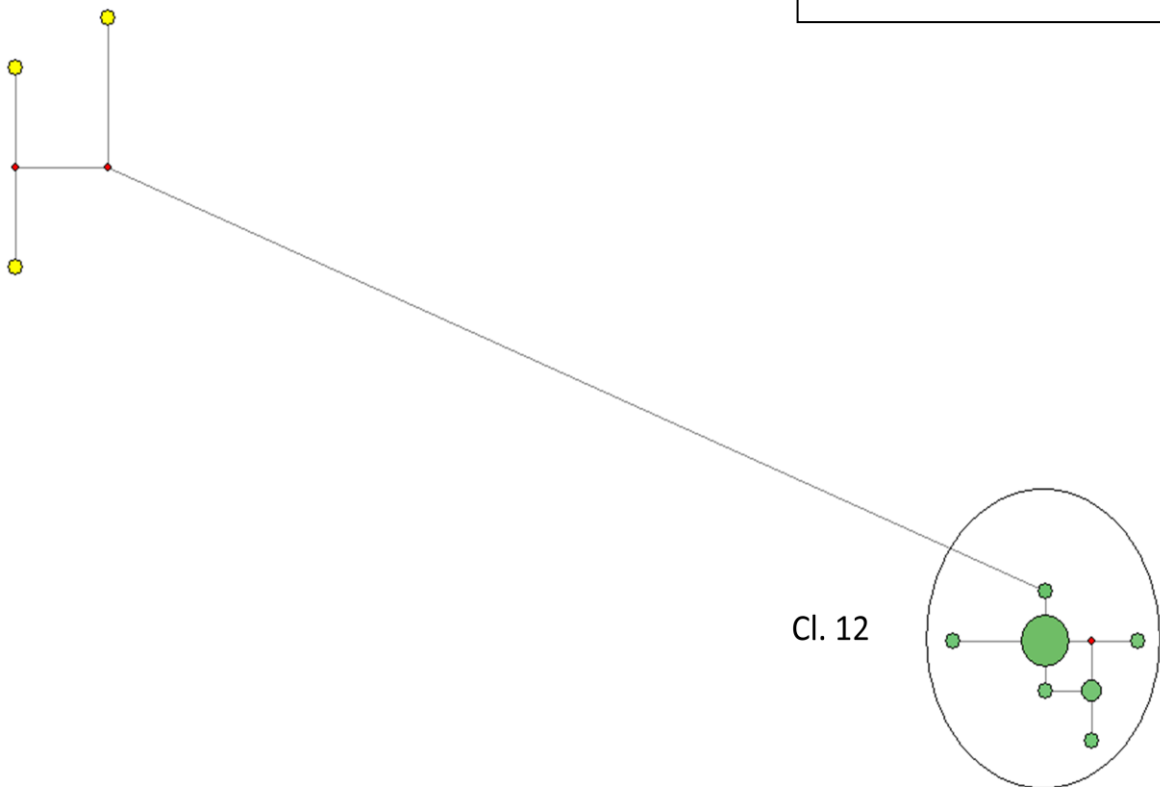

Category: Rare

# Cadenas

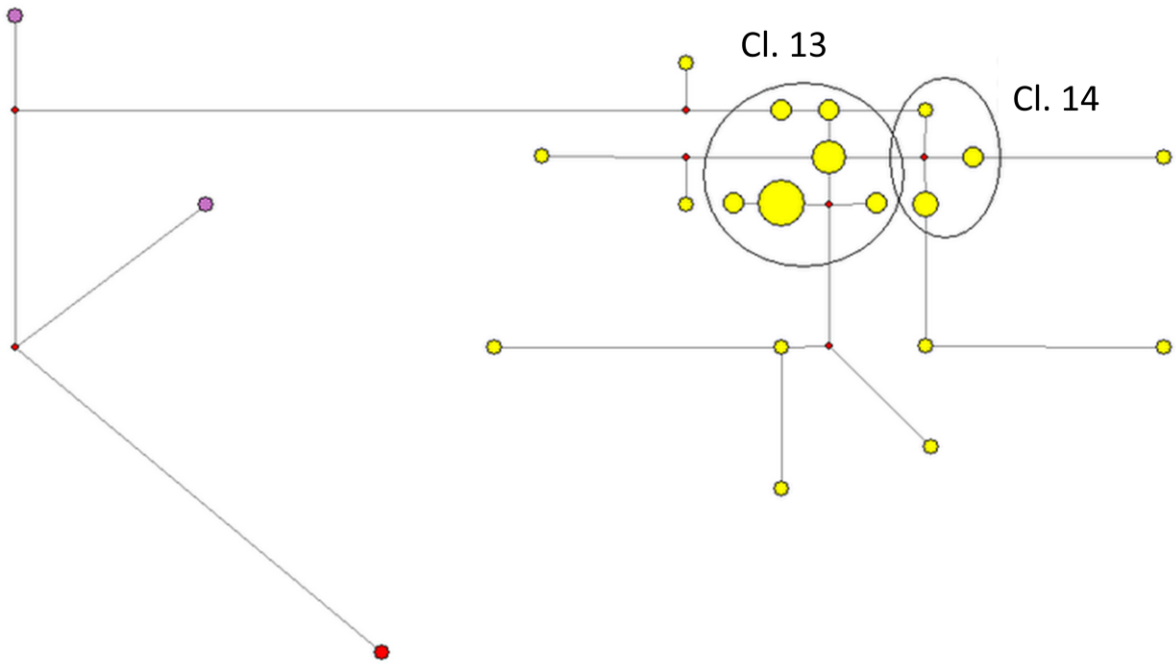

# Castell

Category: Medium

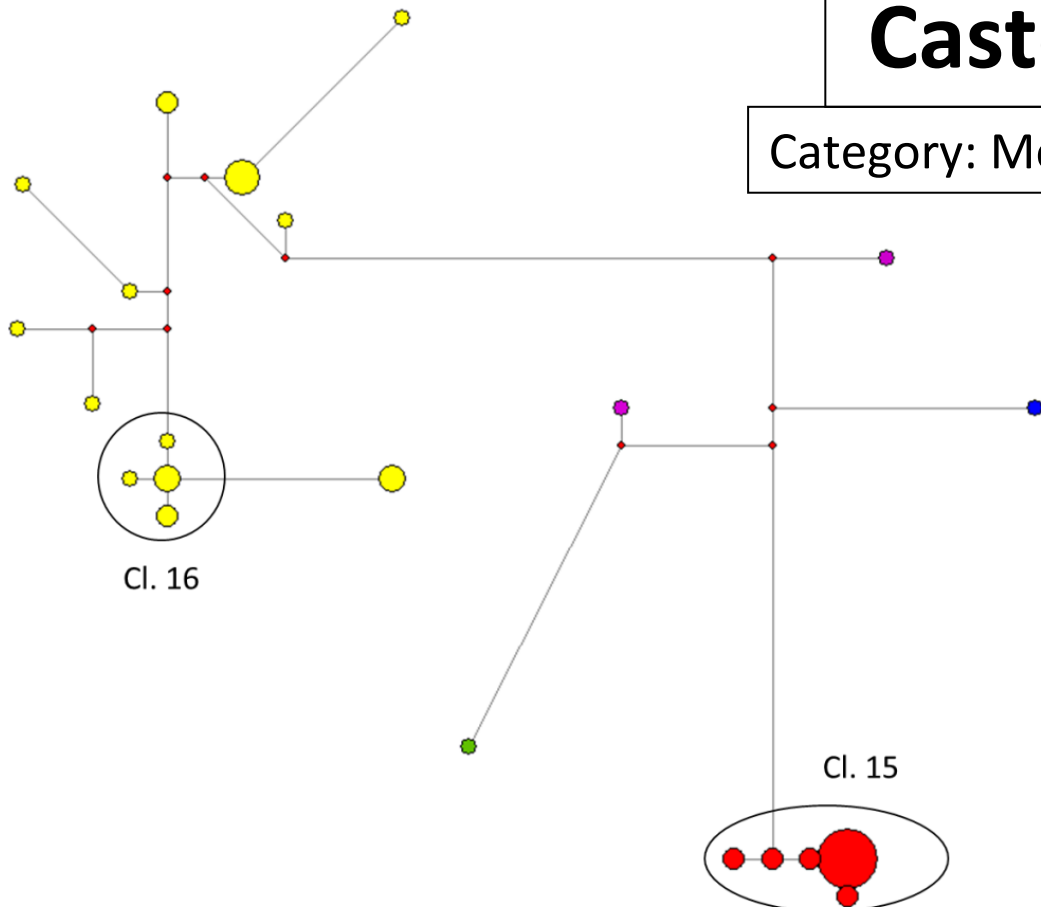

**Diez**

Category: Frequent

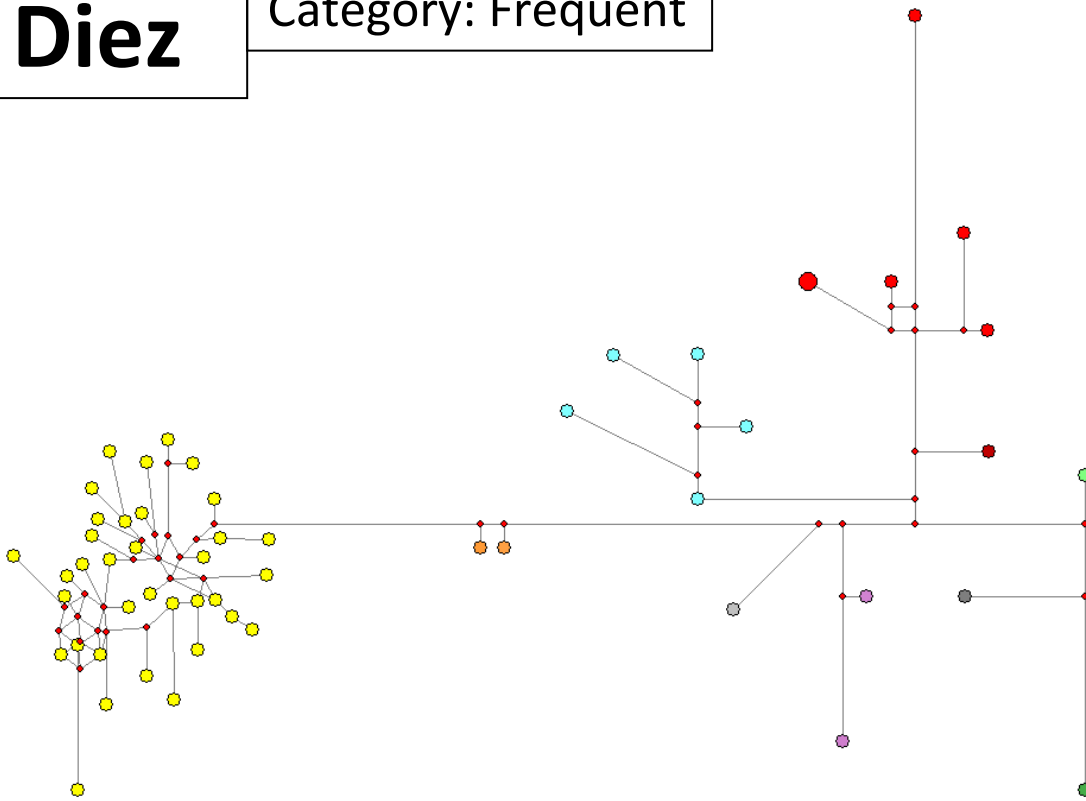

Category: Extr. Frequent

**Fernandez**

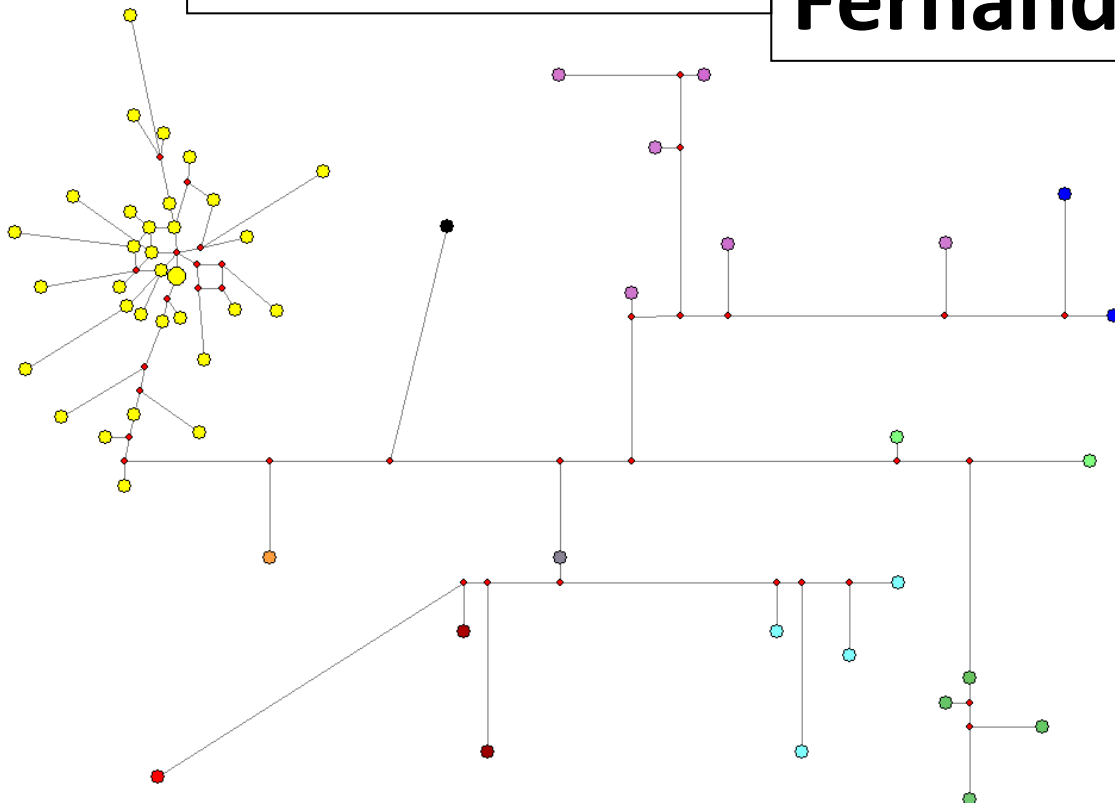

Category: Very Rare

# Gordon

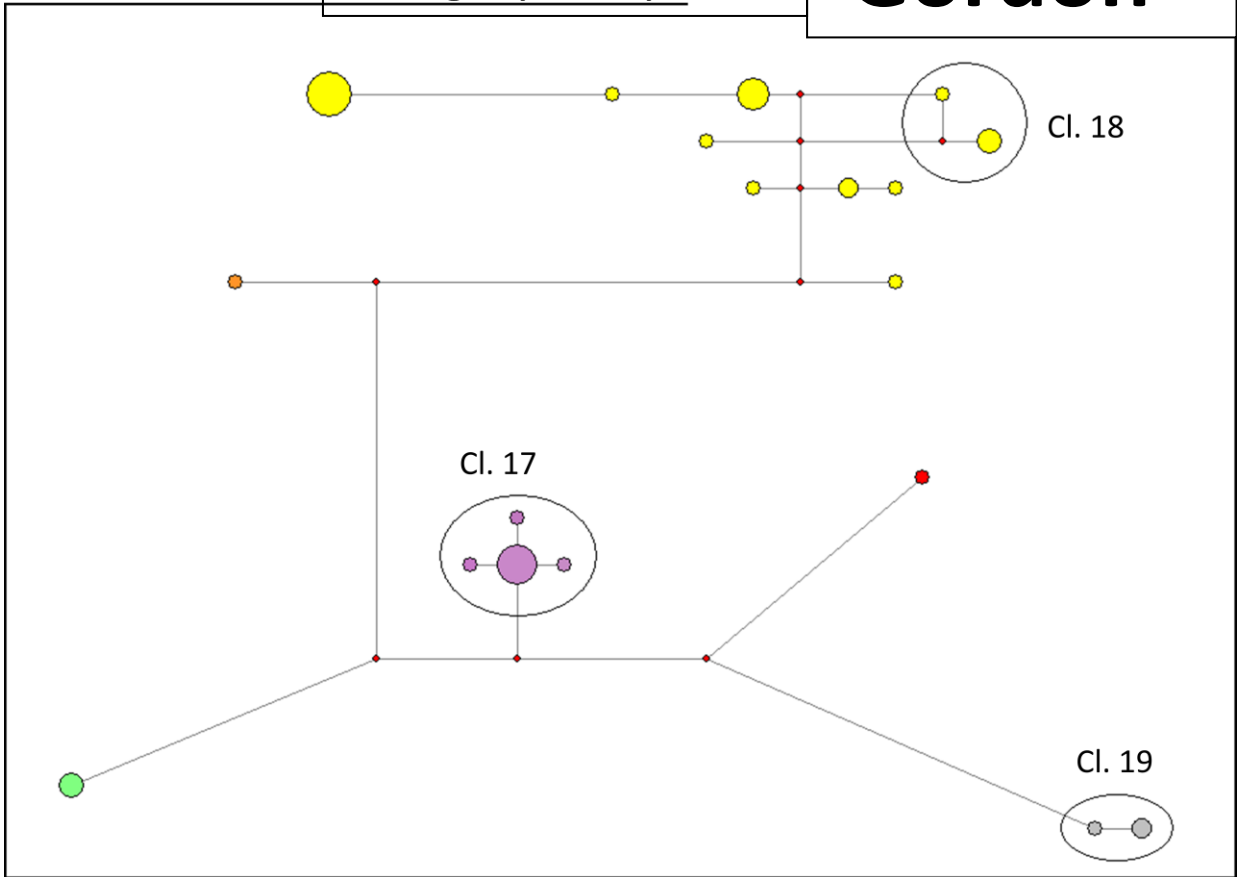

Category: Rare

# Granell

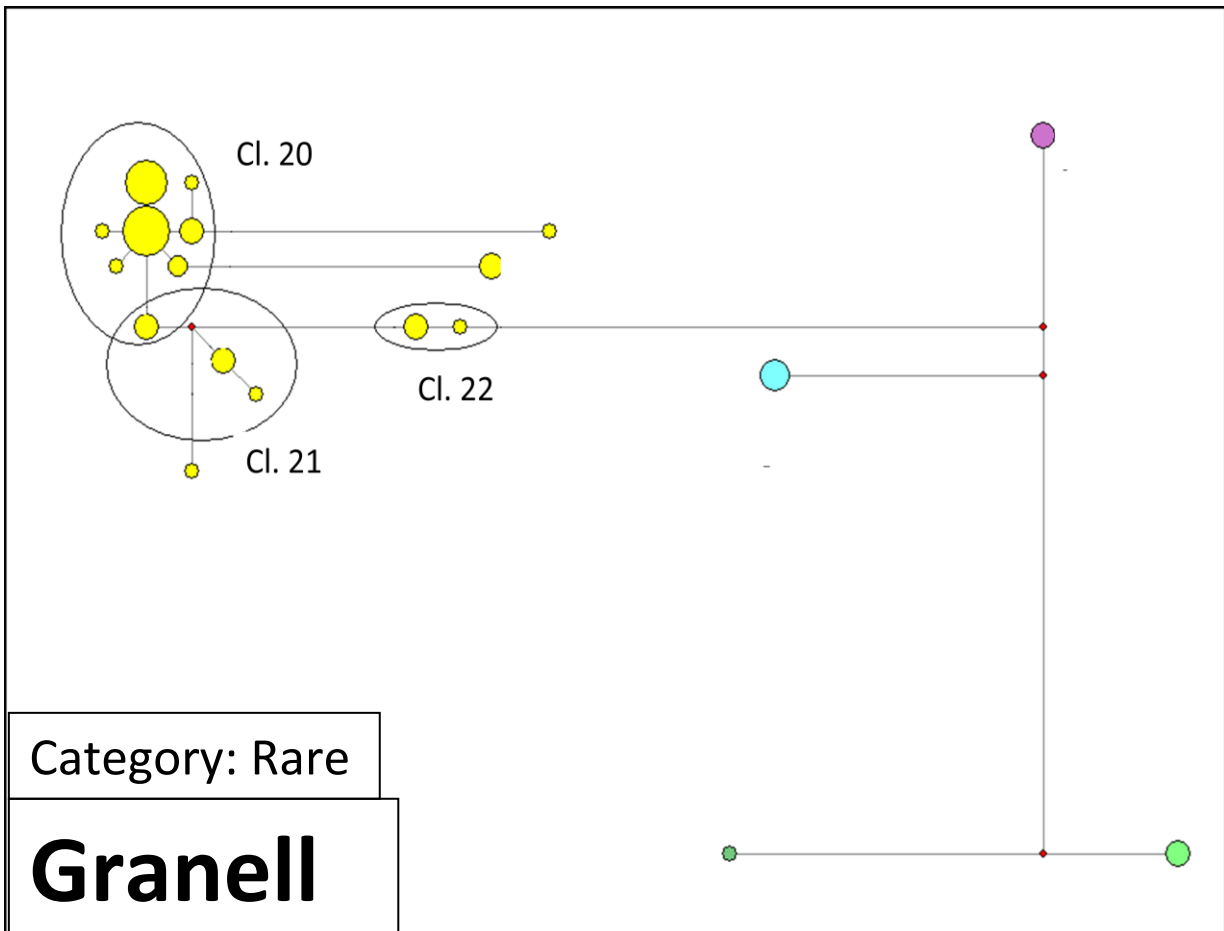

Category: Frequent

**Herrero**

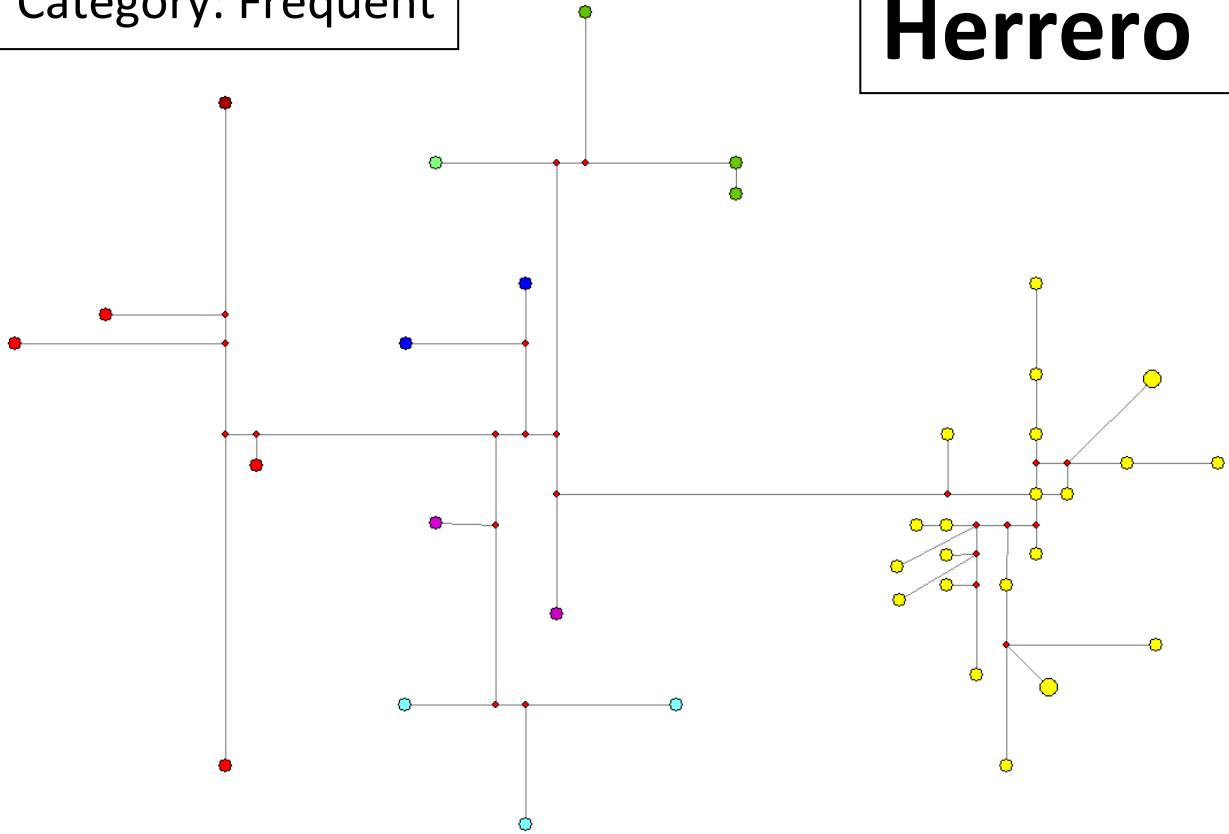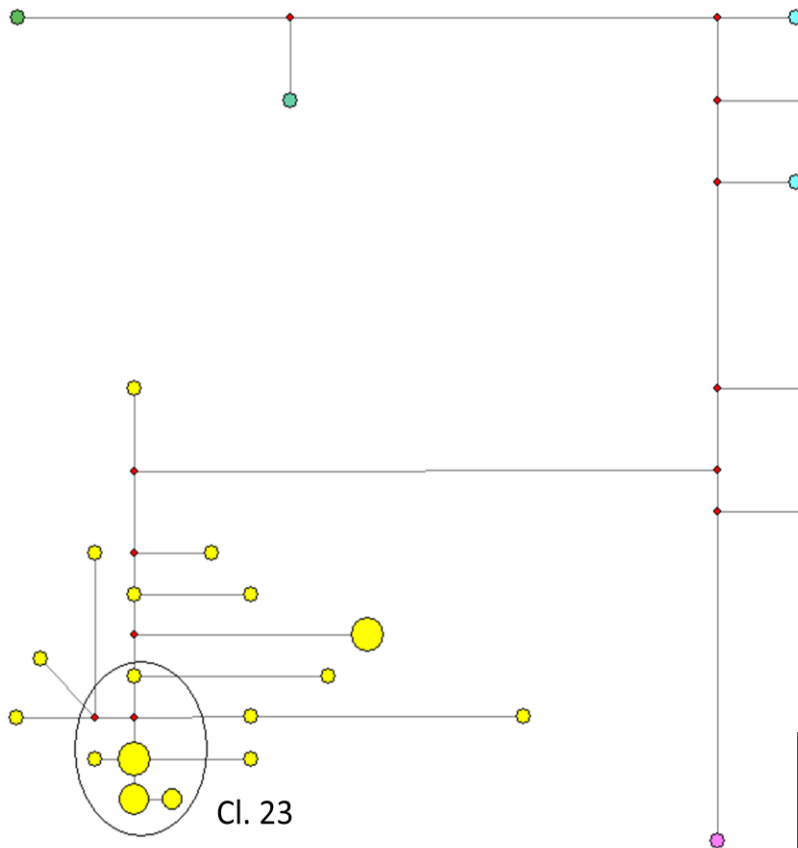

Category: Rare

**Huguet**

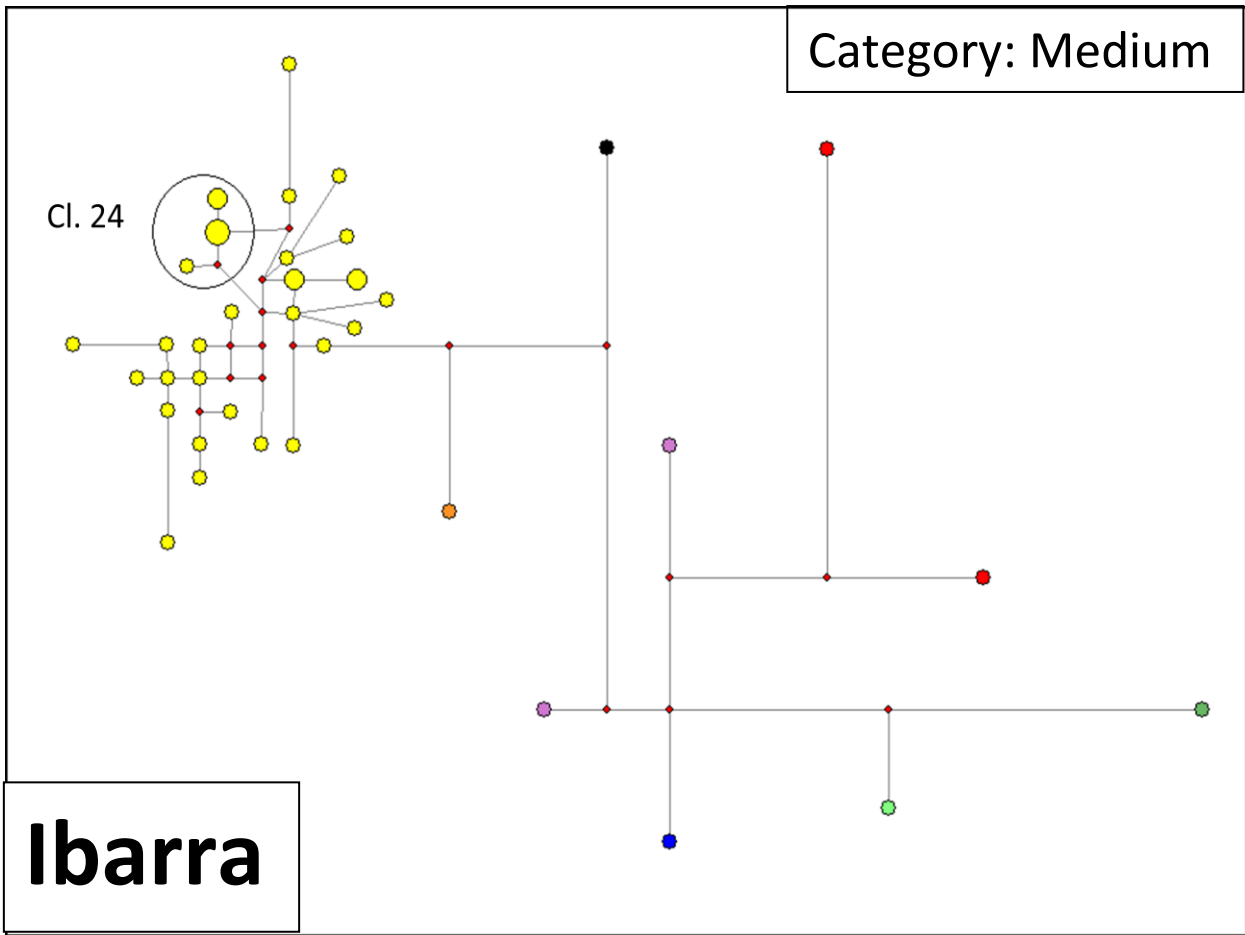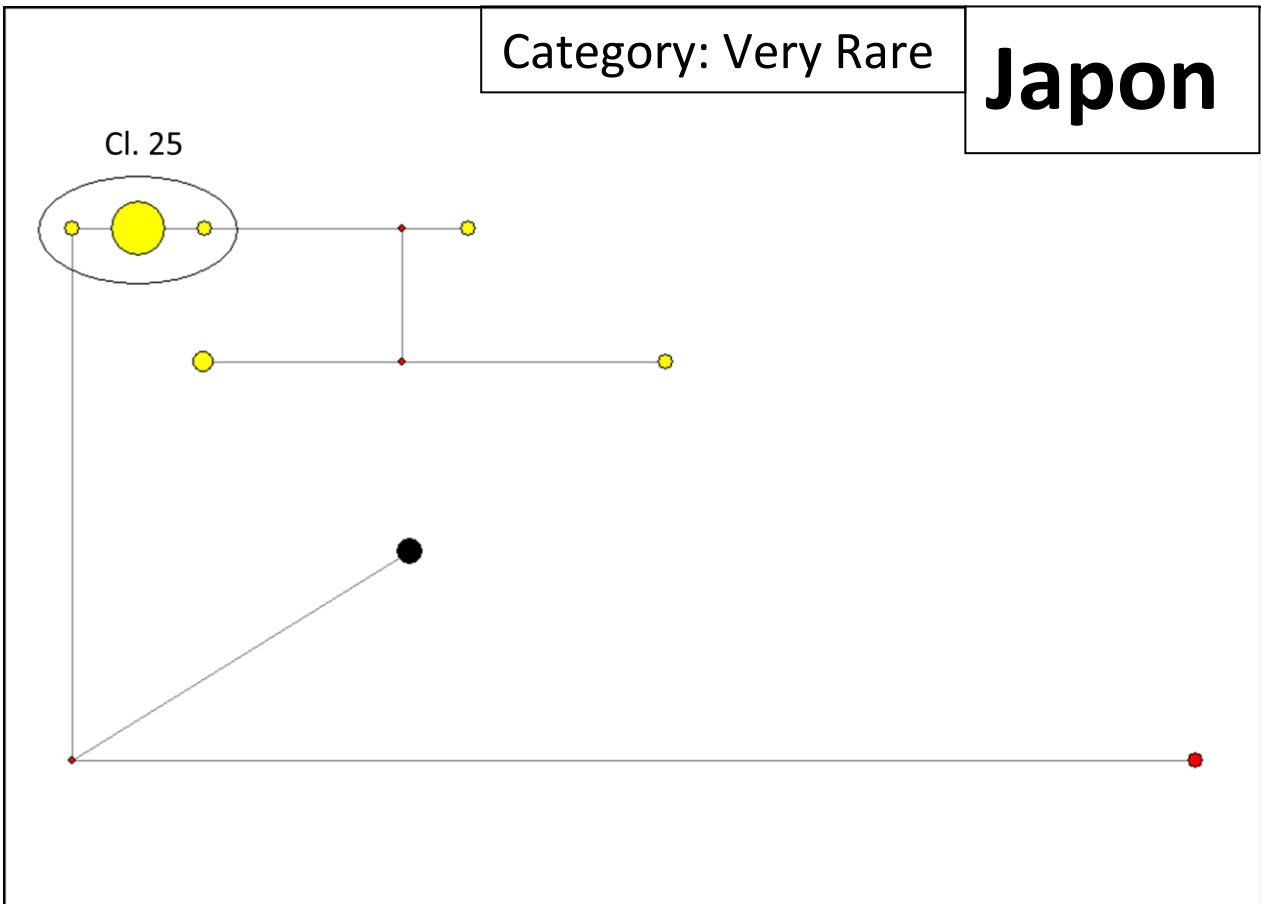

Category: Frequent

**Juarez**

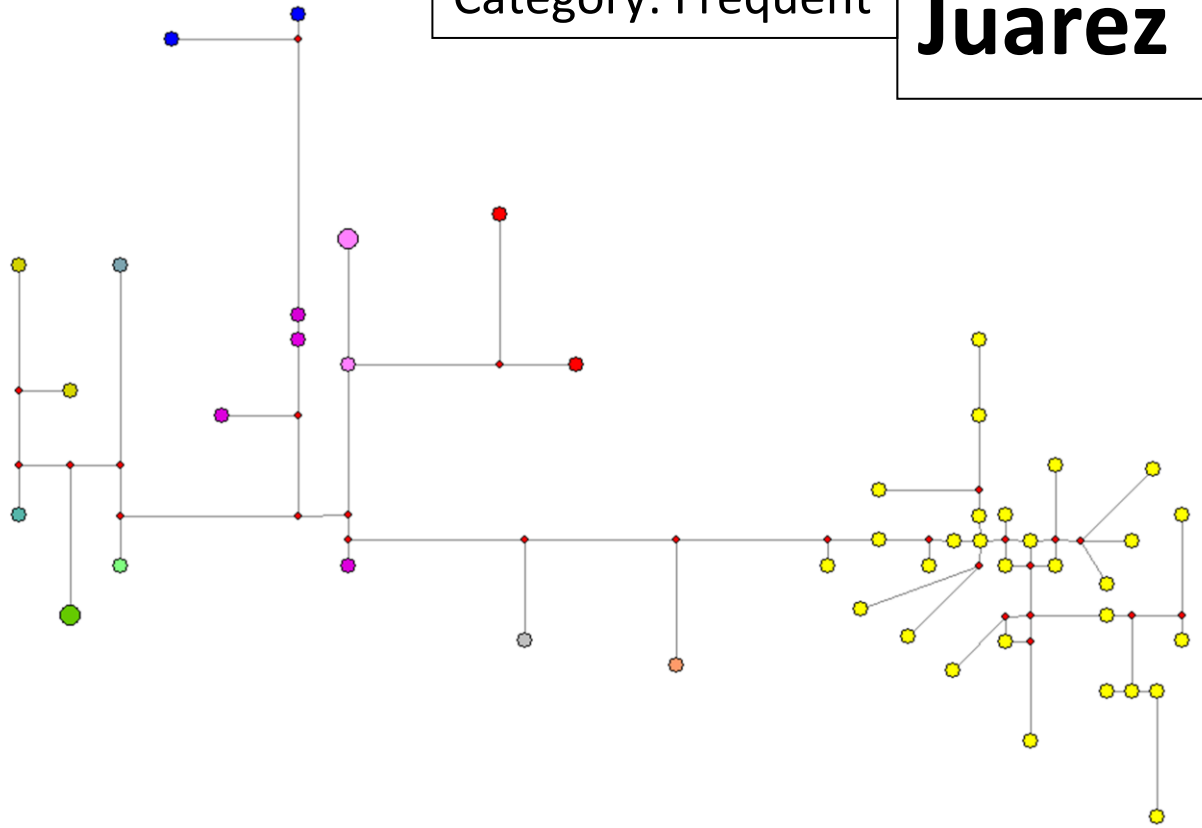

Category: Frequent

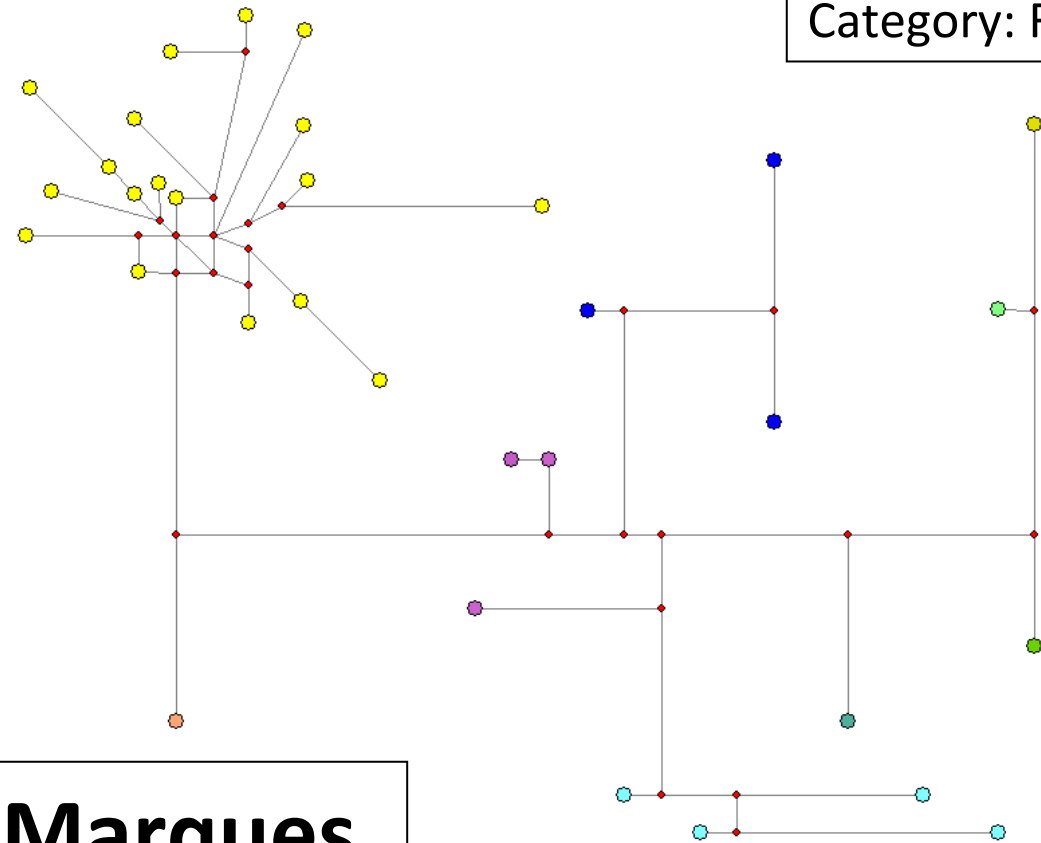

**Marques**

# Martinez

Category: Extr. Frequent

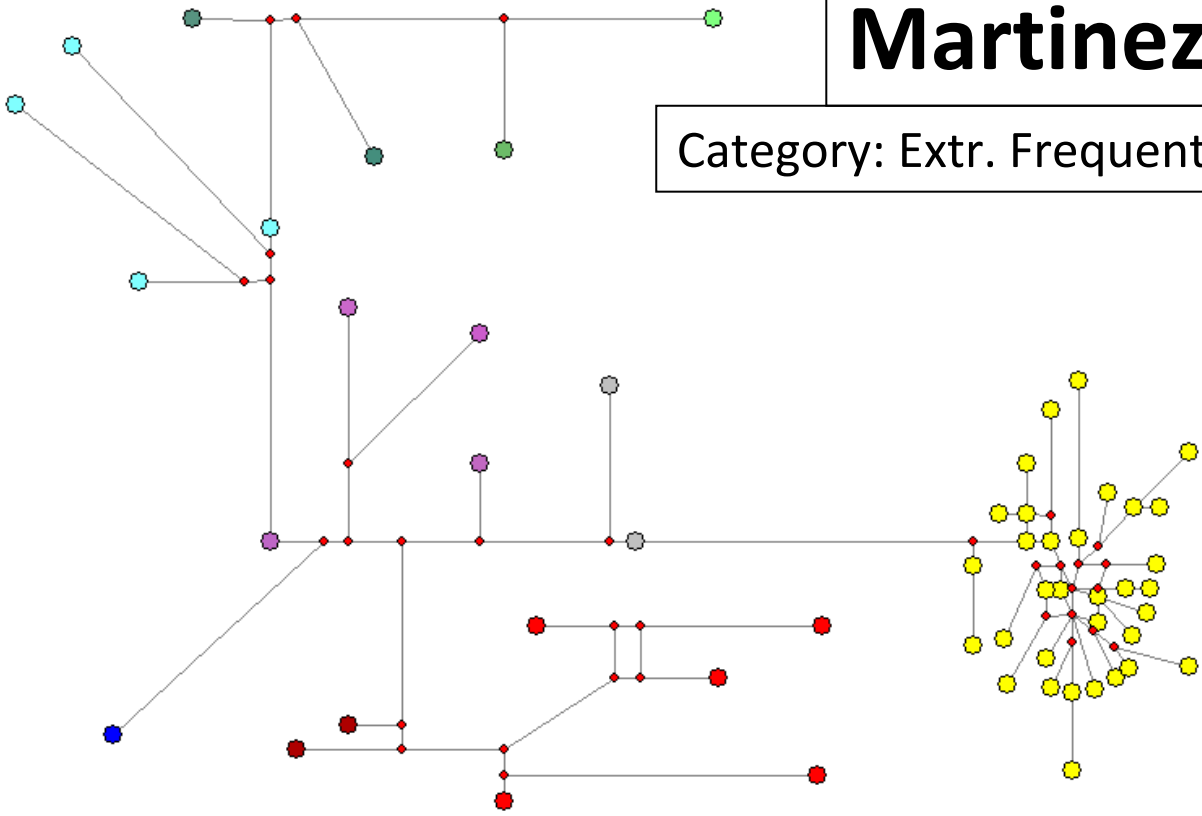

# Mateos

Category: Frequent

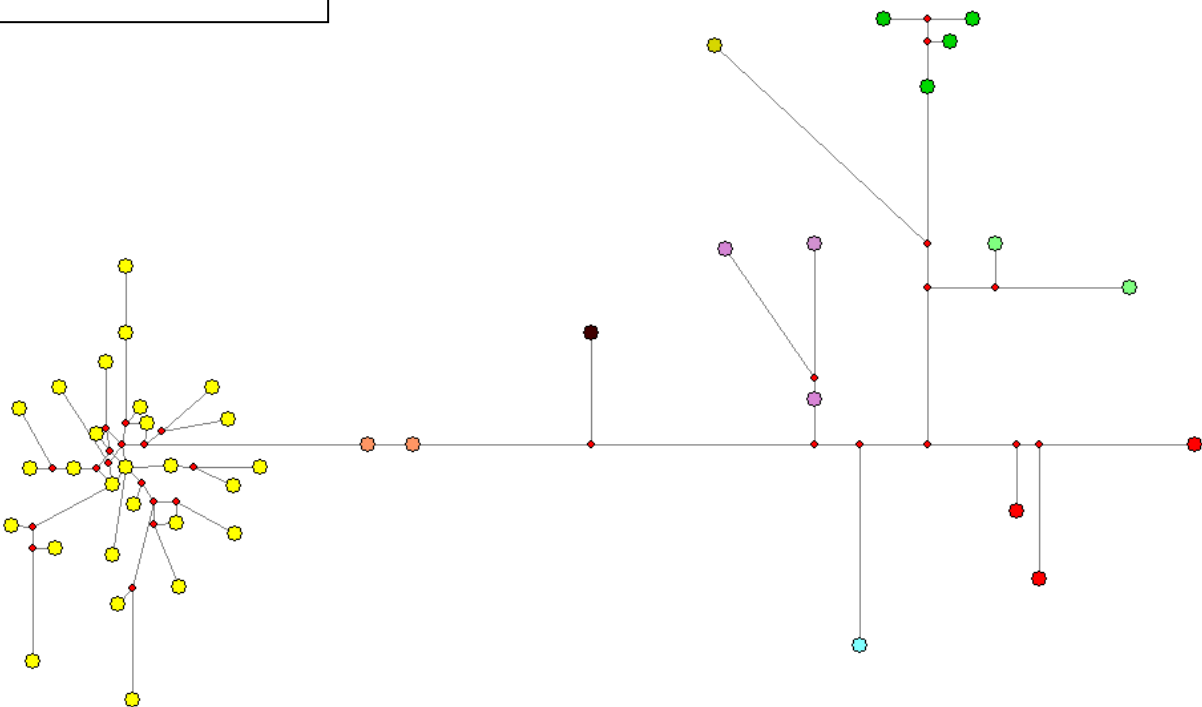



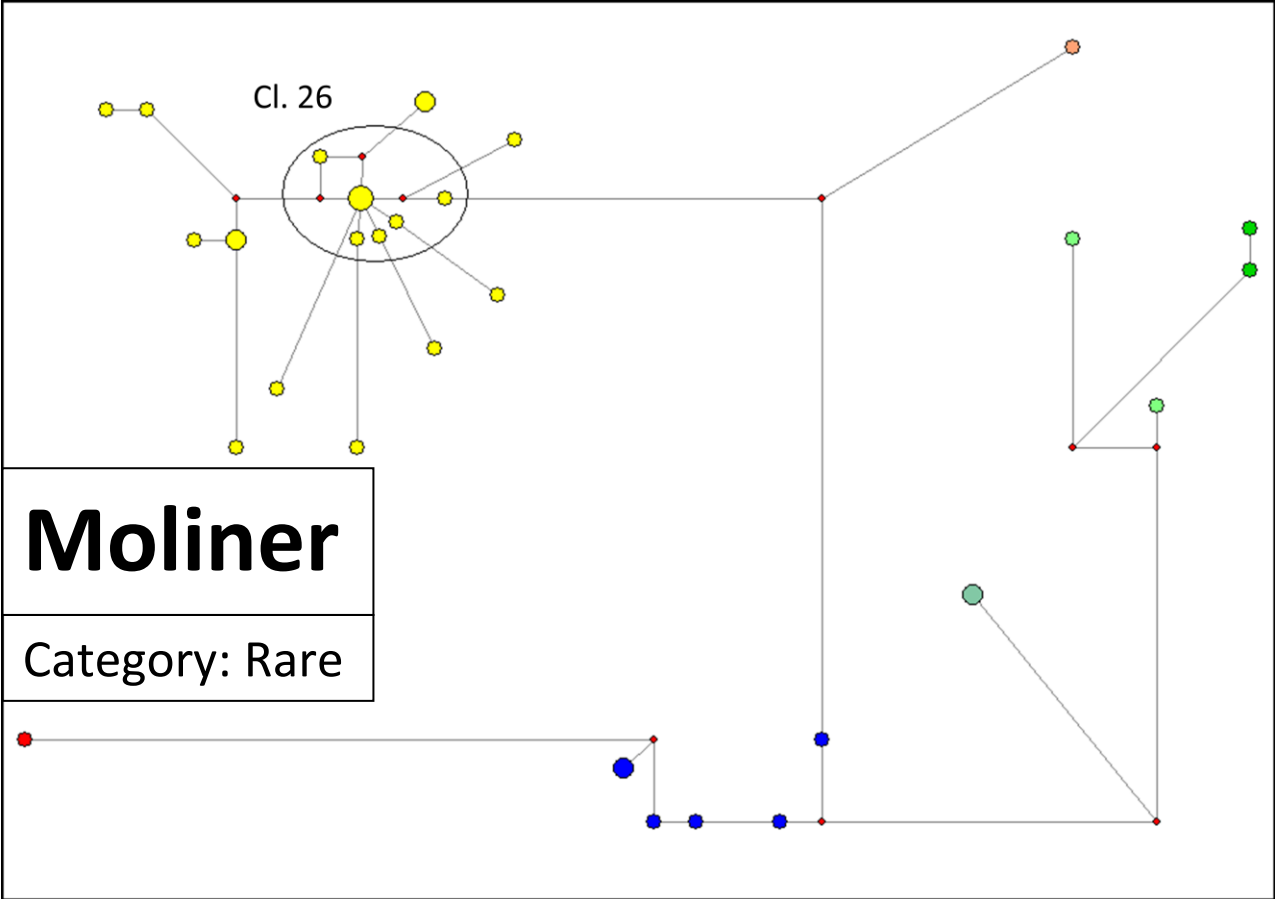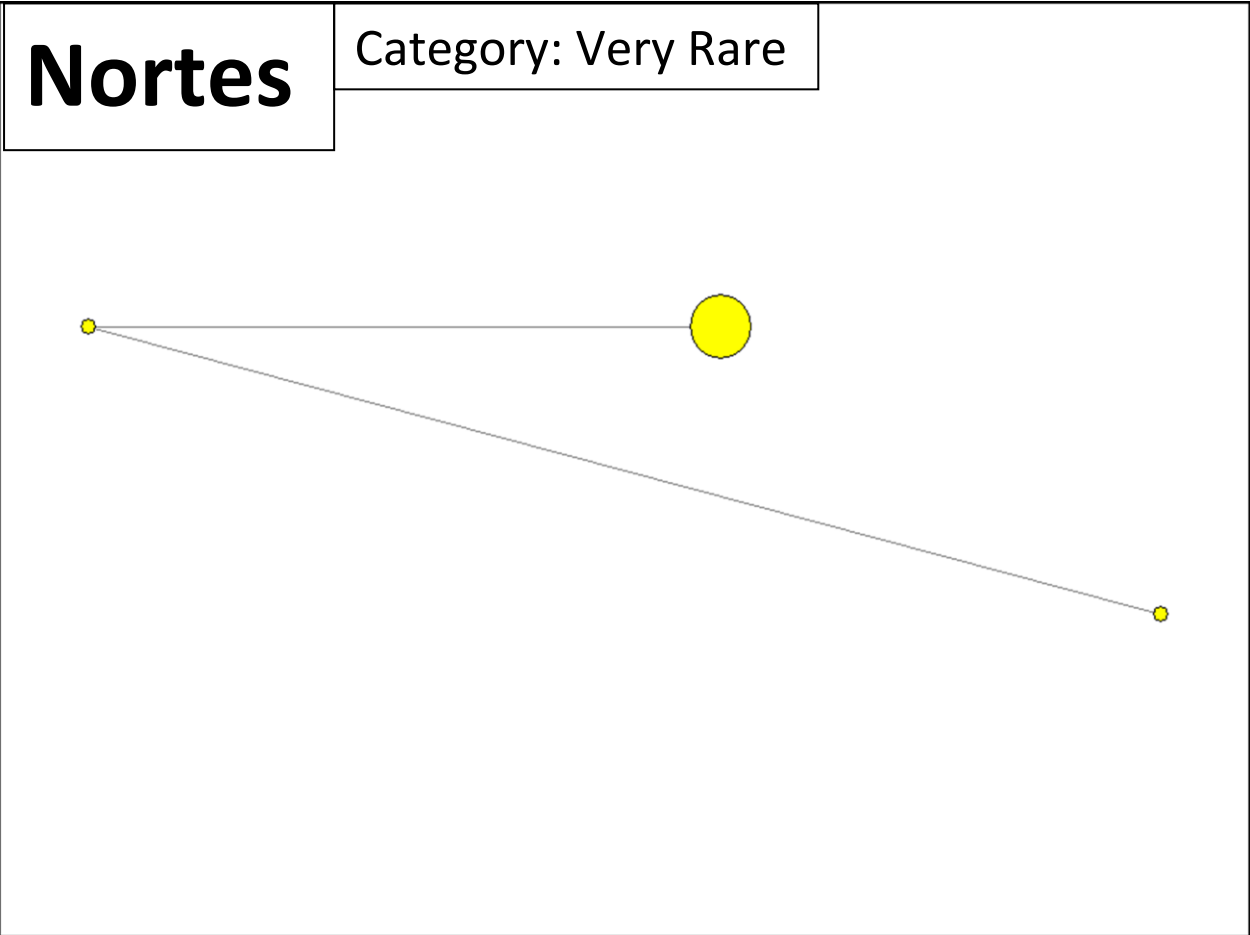

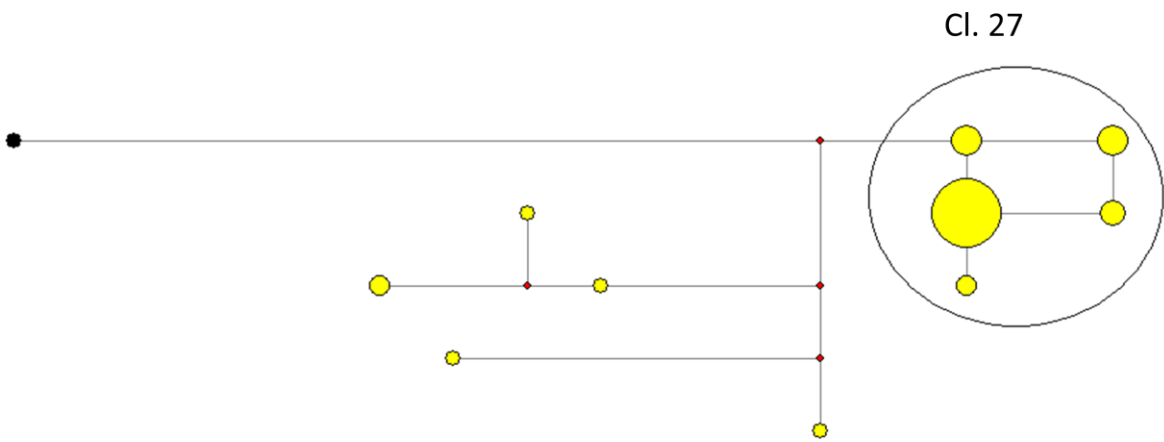

**Olaizola**

Category: Very Rare

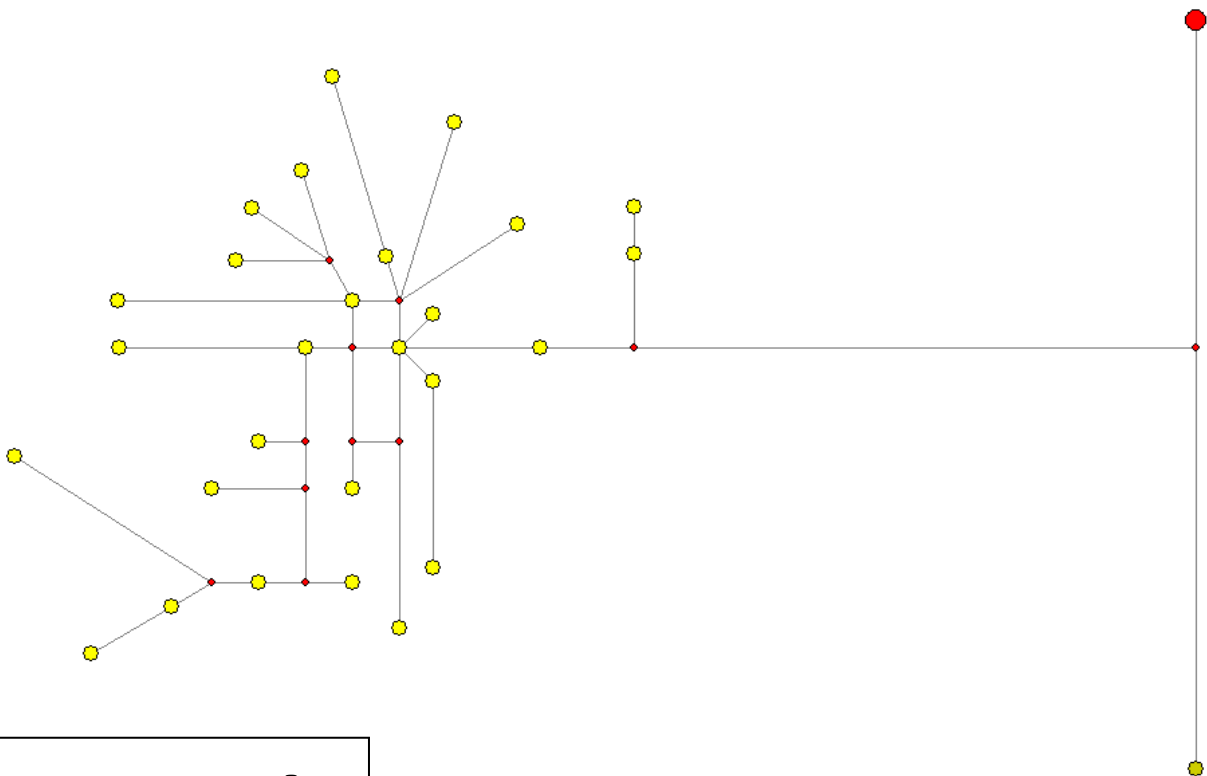

**Pascual**

Category: Frequent

# Quevedo

Category: Medium

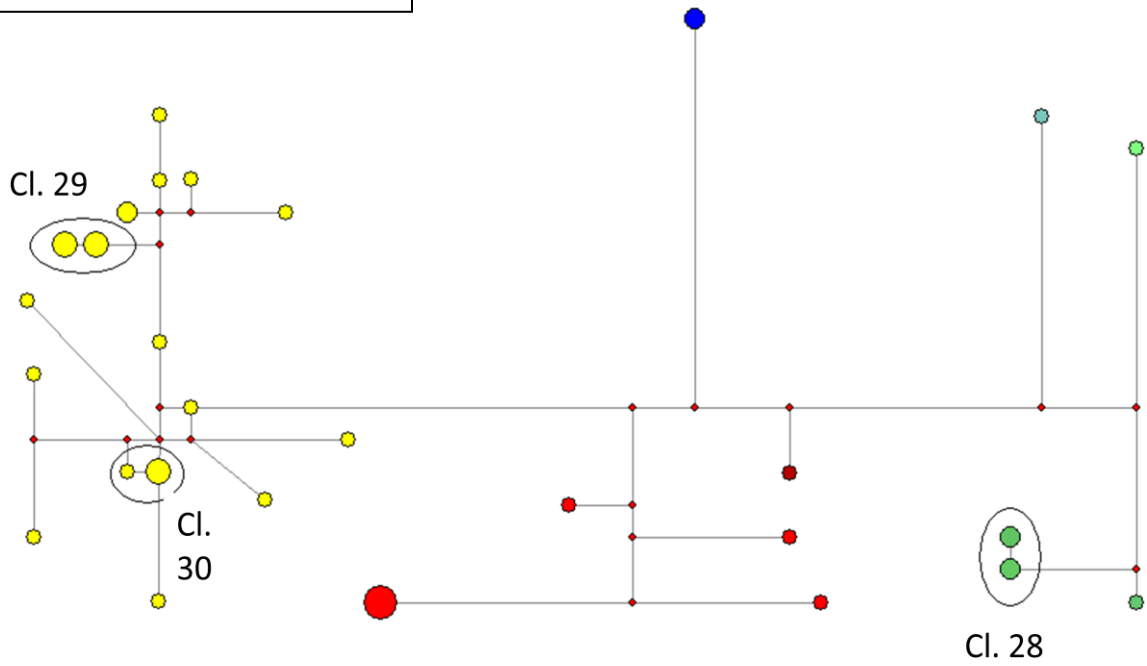

Category: Very Rare

# Renau

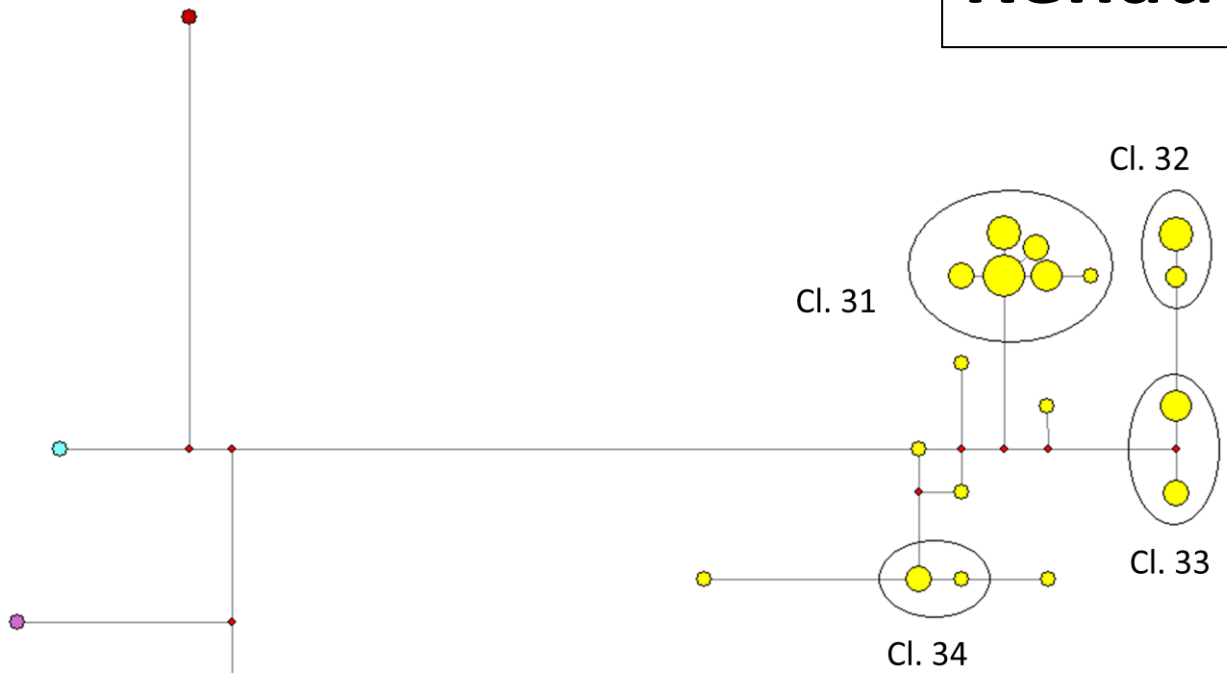

# Ribalta

Category: Very Rare

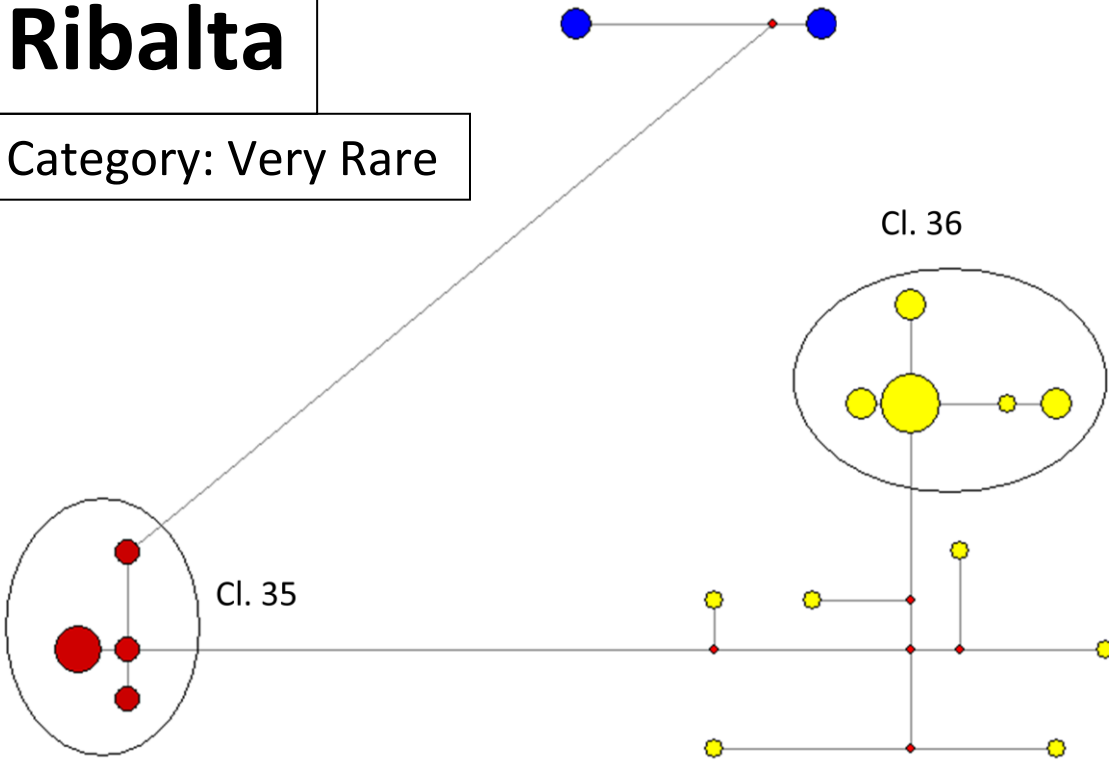

# Rubio

Category: Frequent

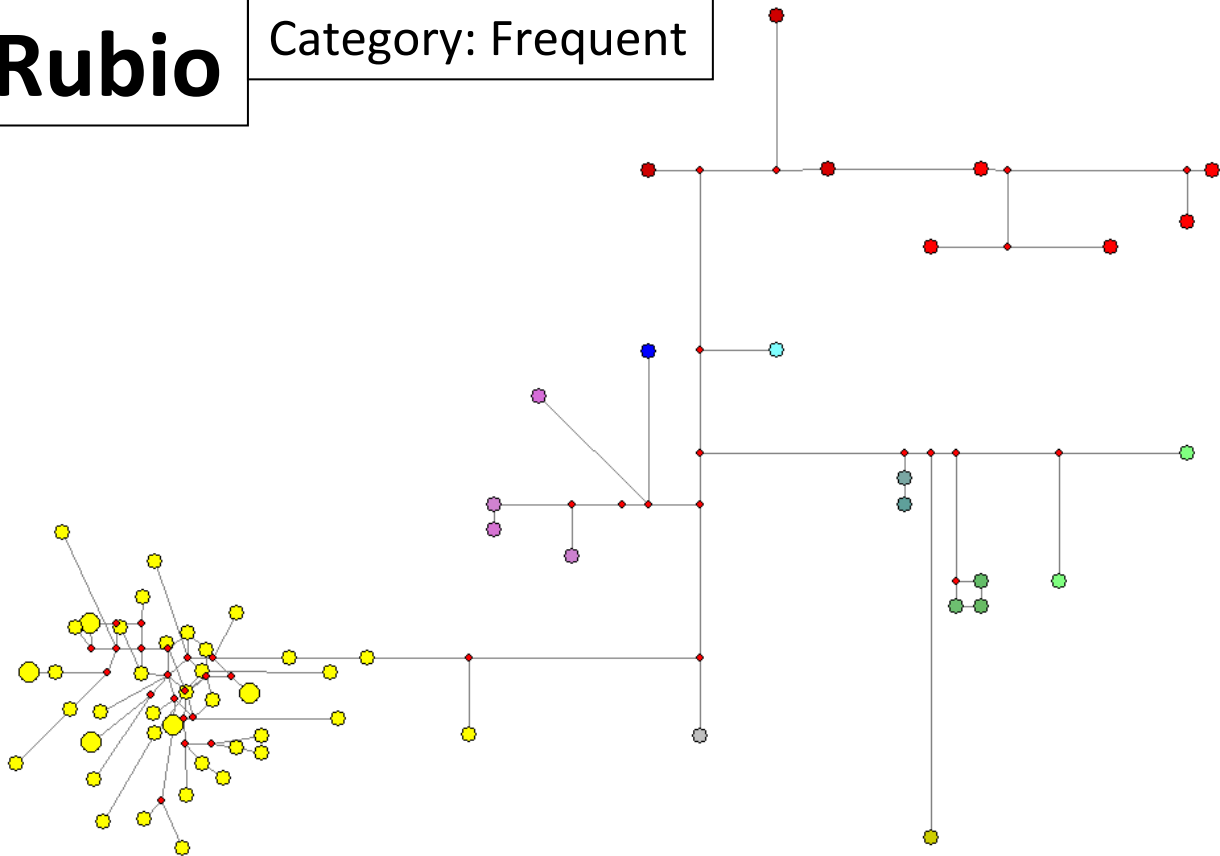

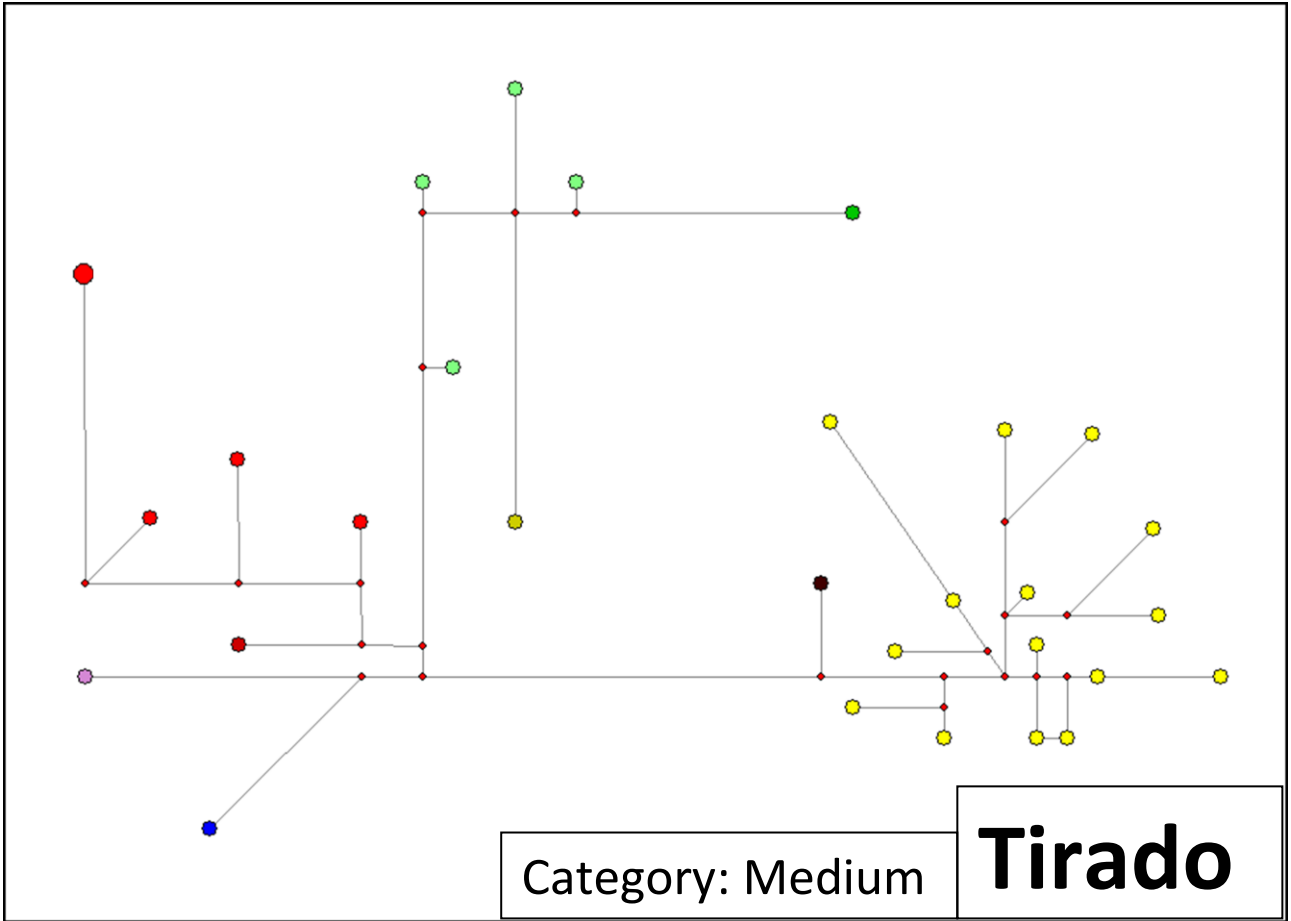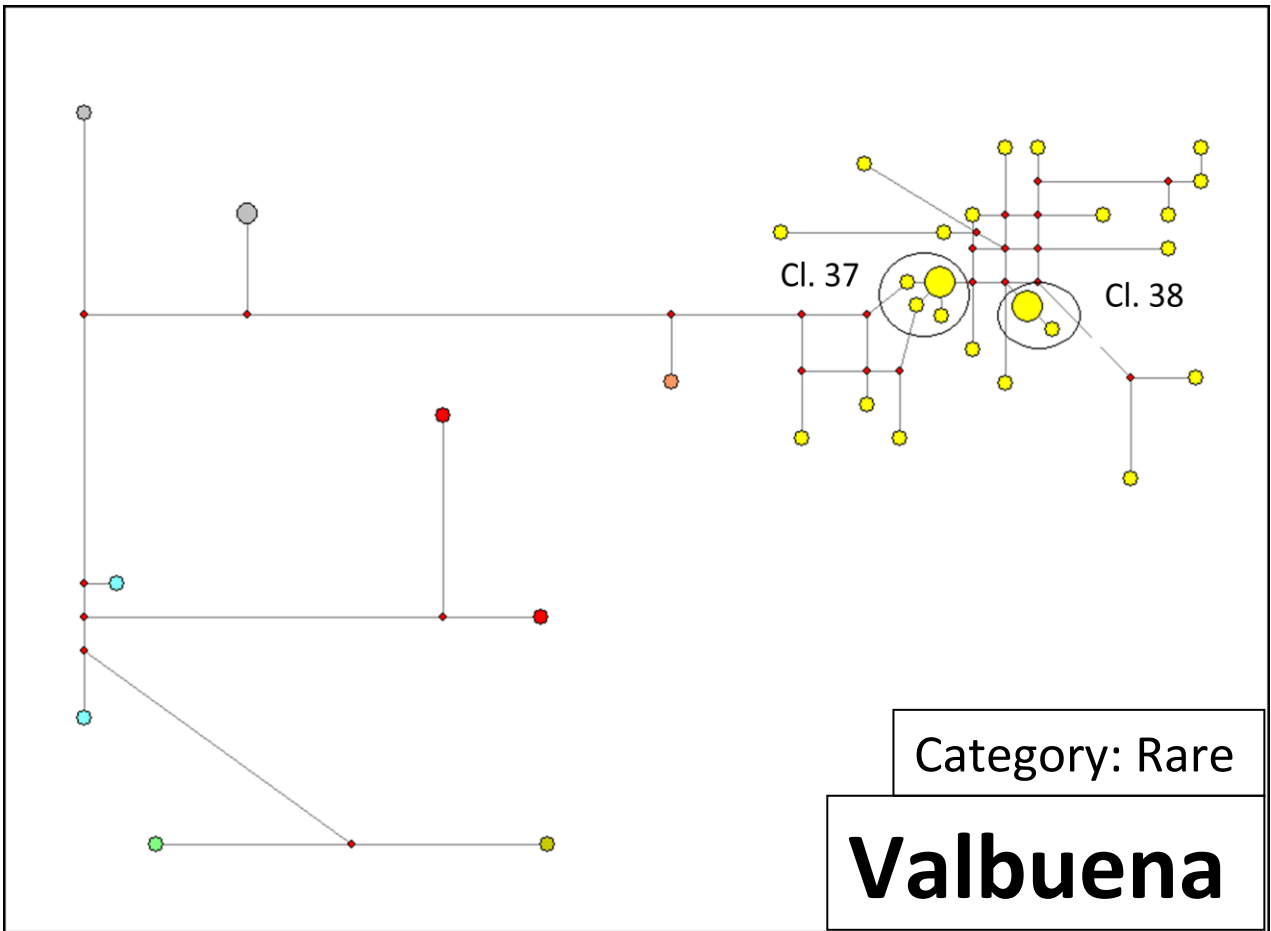

# Villarroel

Category: Rare

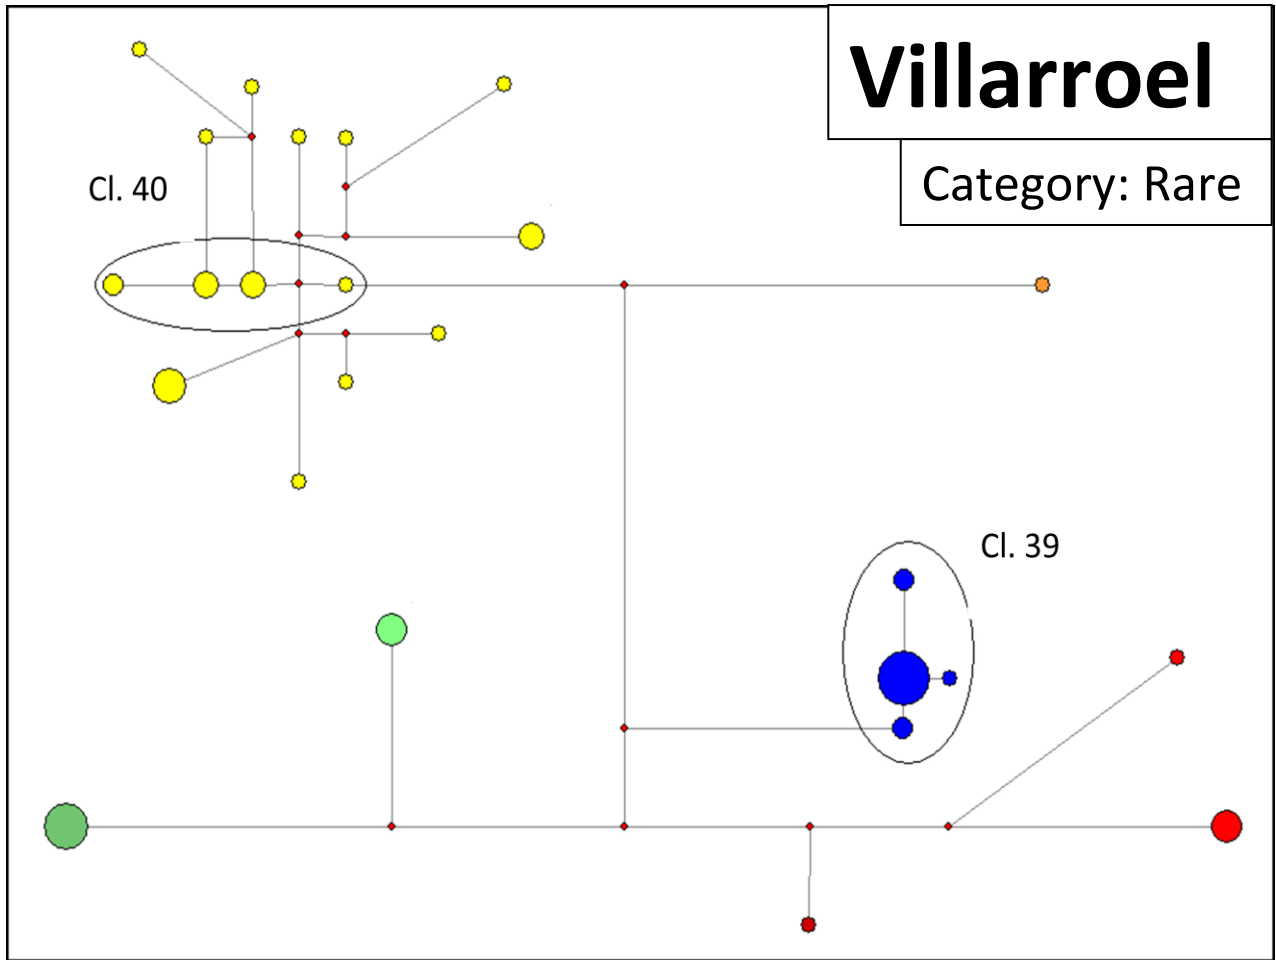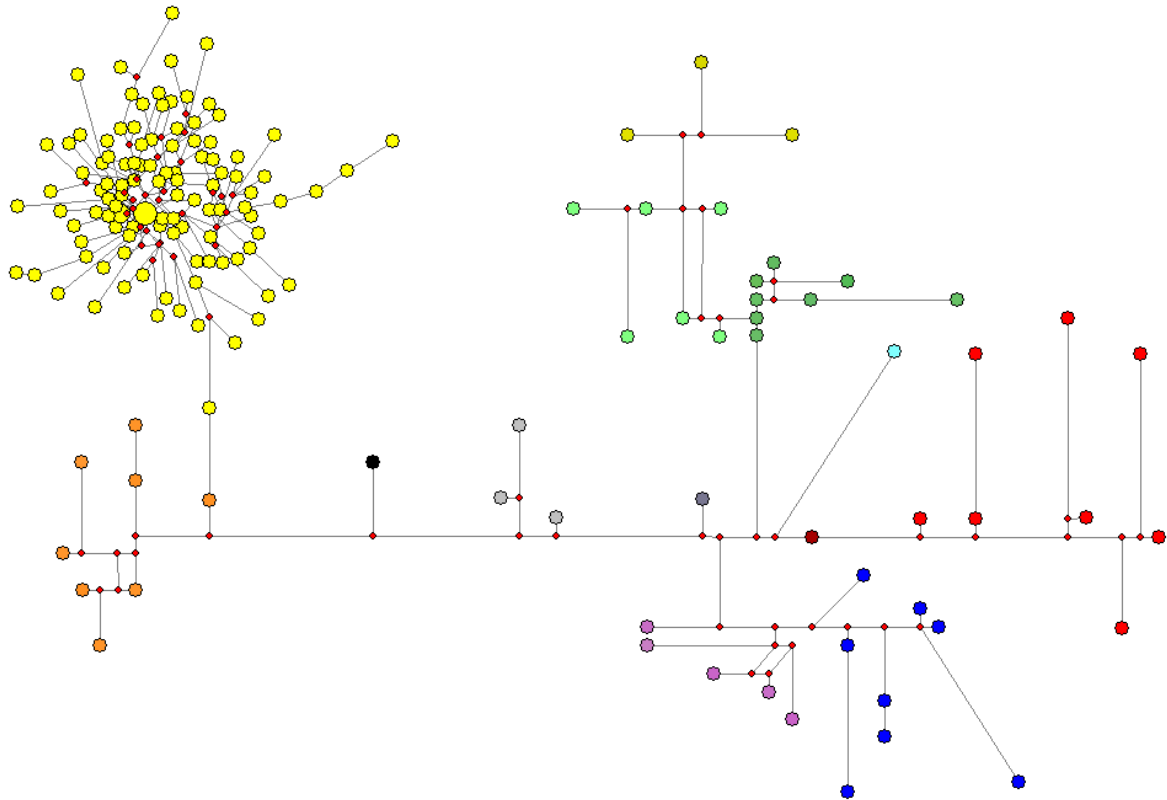

Spanish Controls

## MEDIAN-JOINING NETWORKS

NETWORKS OF COMPARATIVE DATA (SPANISH, ENGLISH AND IRISH SURNAMES, IN THAT ORDER) BASED ON SNPs AND 10 SHARED STRs, SHOWING ALL DESCENT CLUSTERS (IN ALPHABETICAL ORDER).

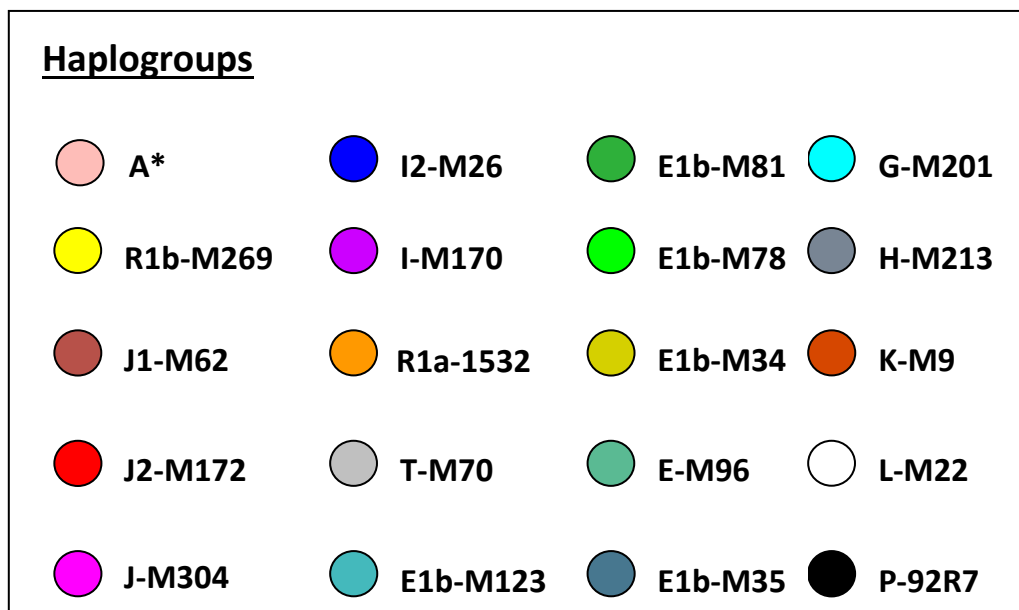

## SPAIN

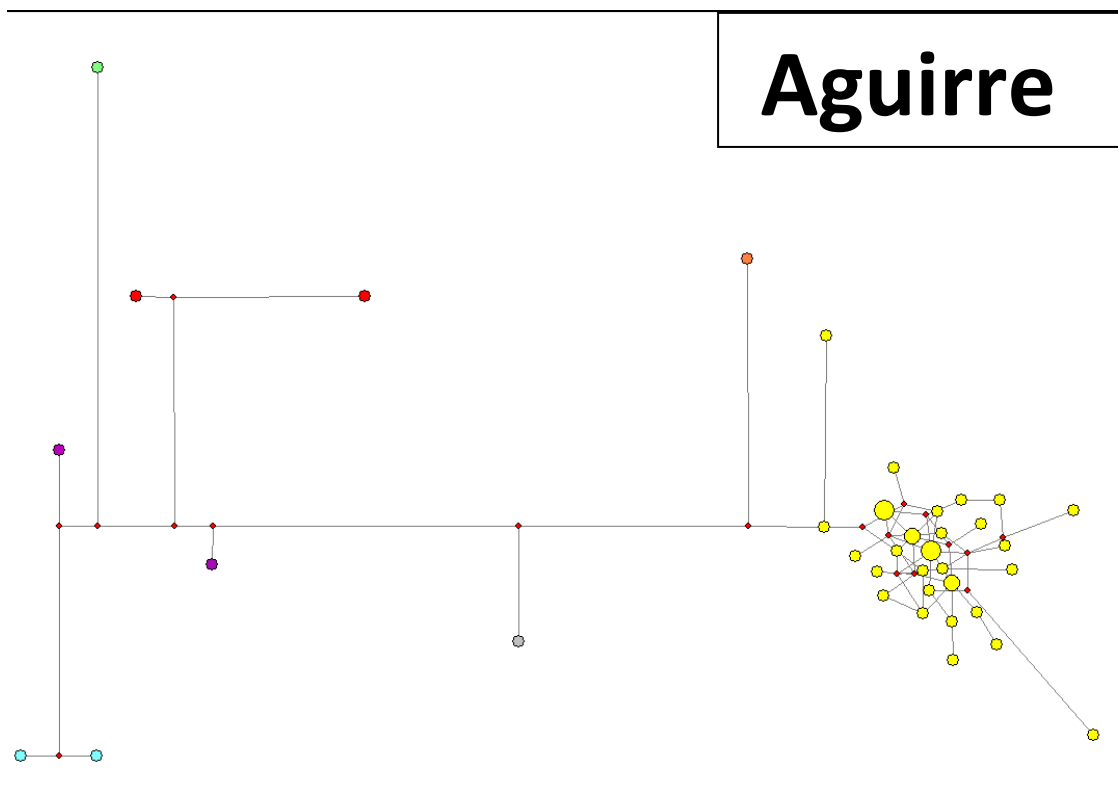

# Albiol

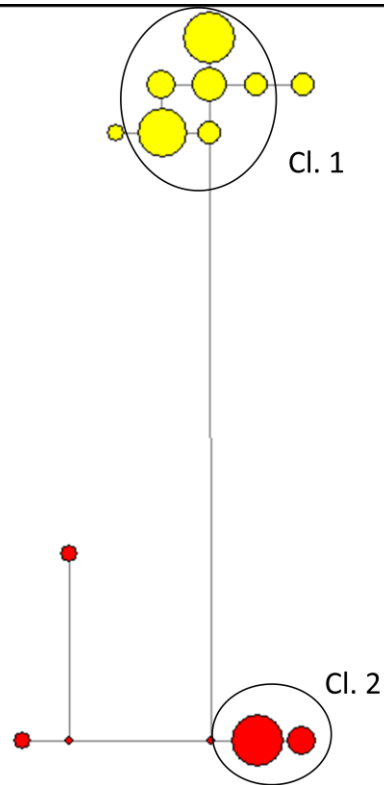

# Alegre

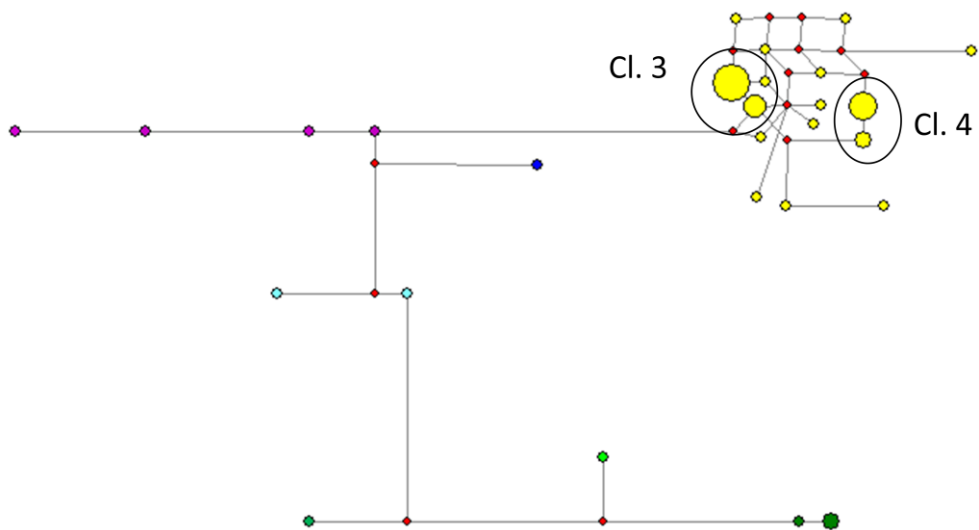



# Andreu

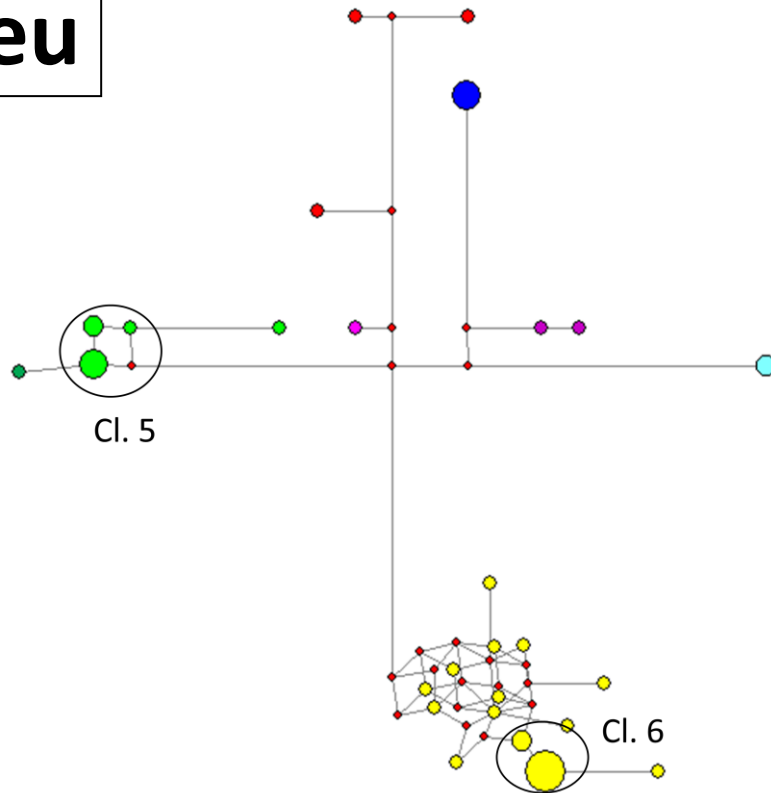

# Ansotegui / Ansuategui

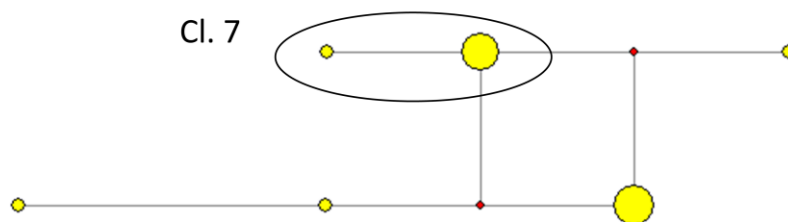

# Artola

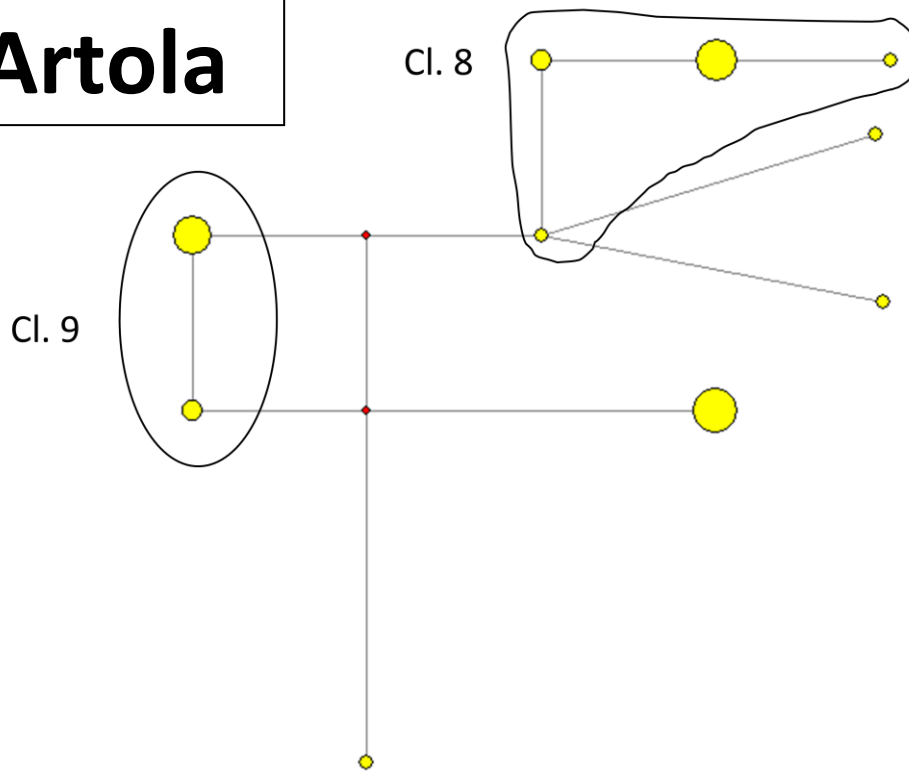

# Baigorri

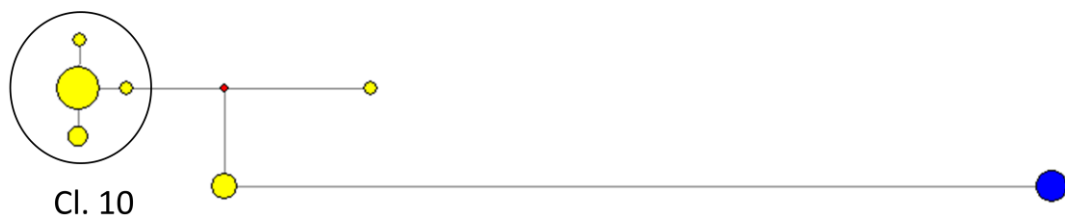

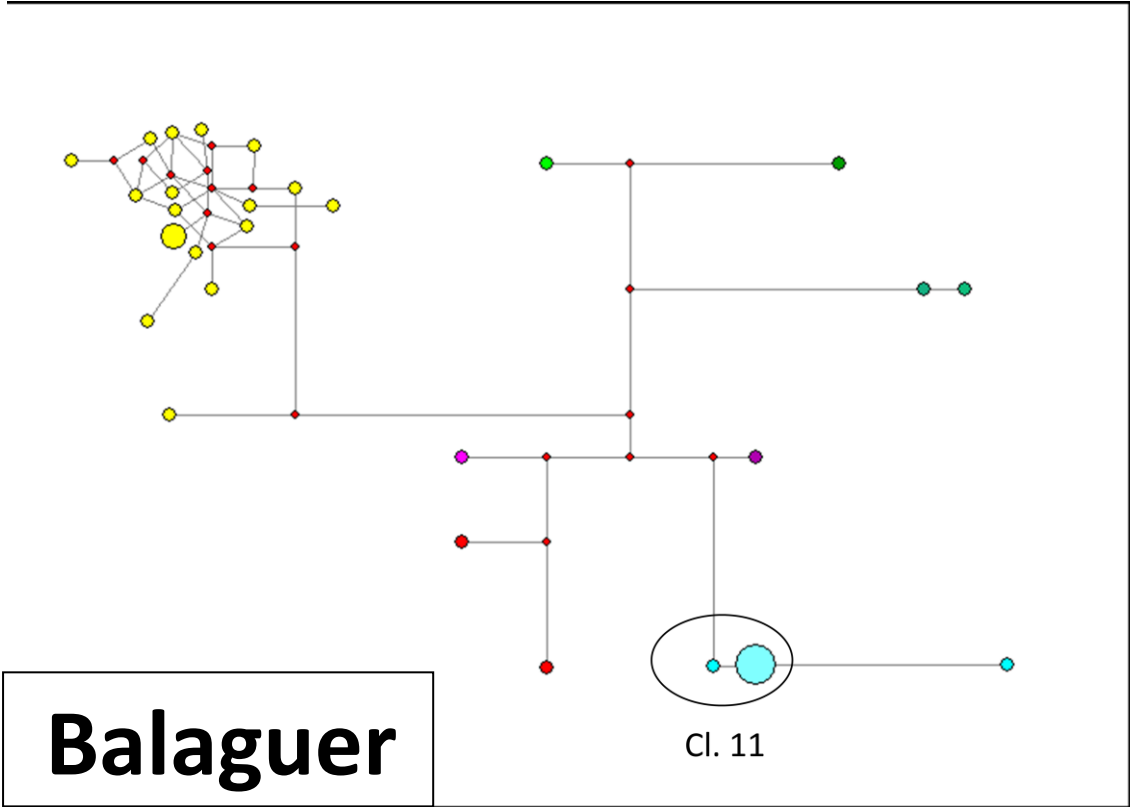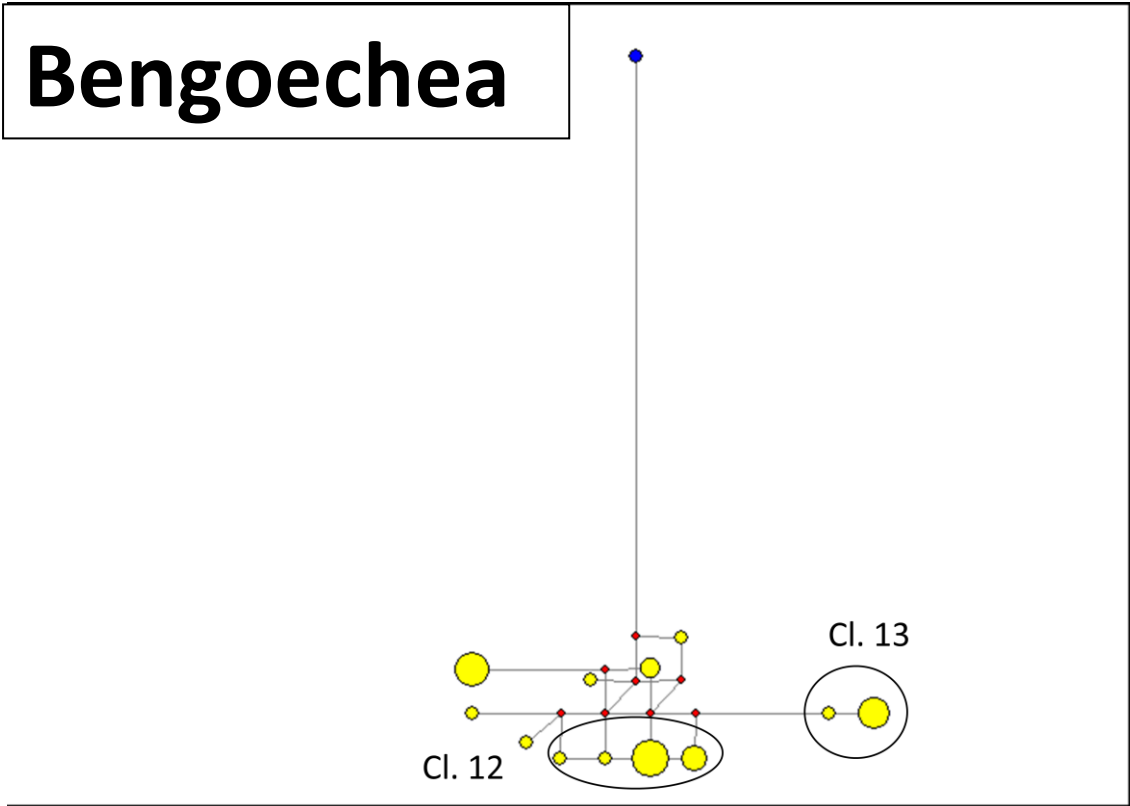

# Bennasar

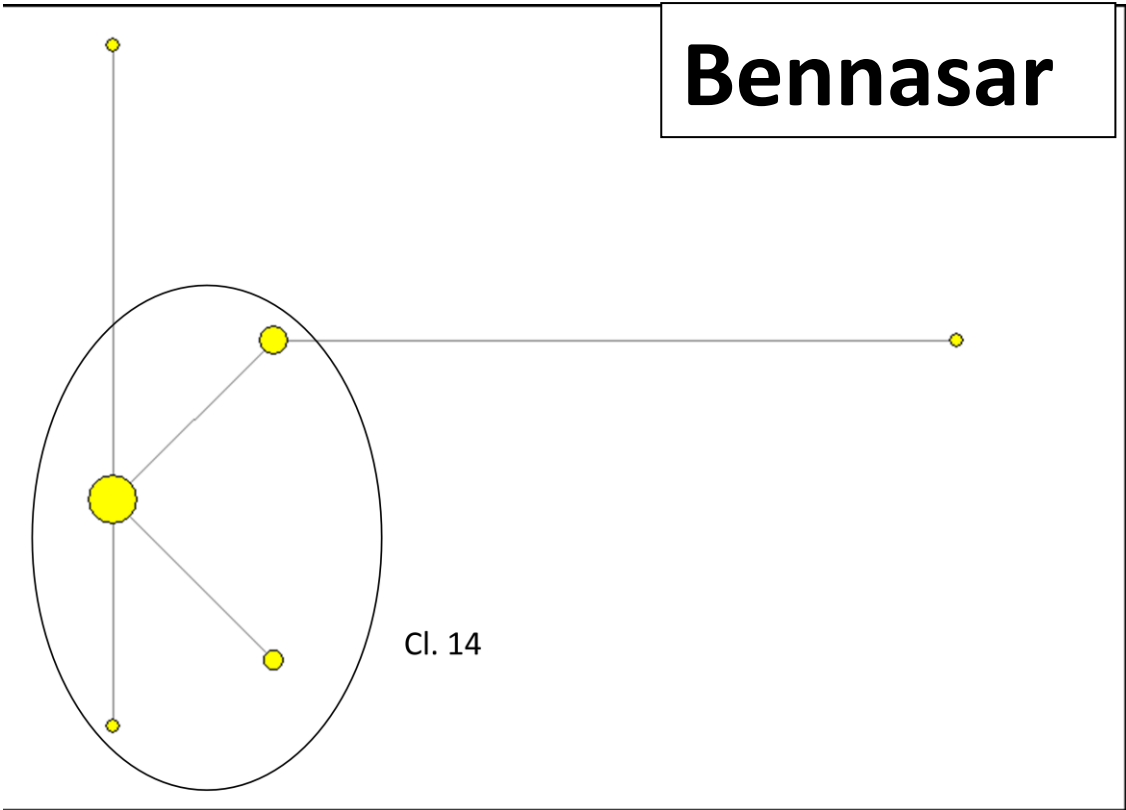

# Bibiloni / Babiloni

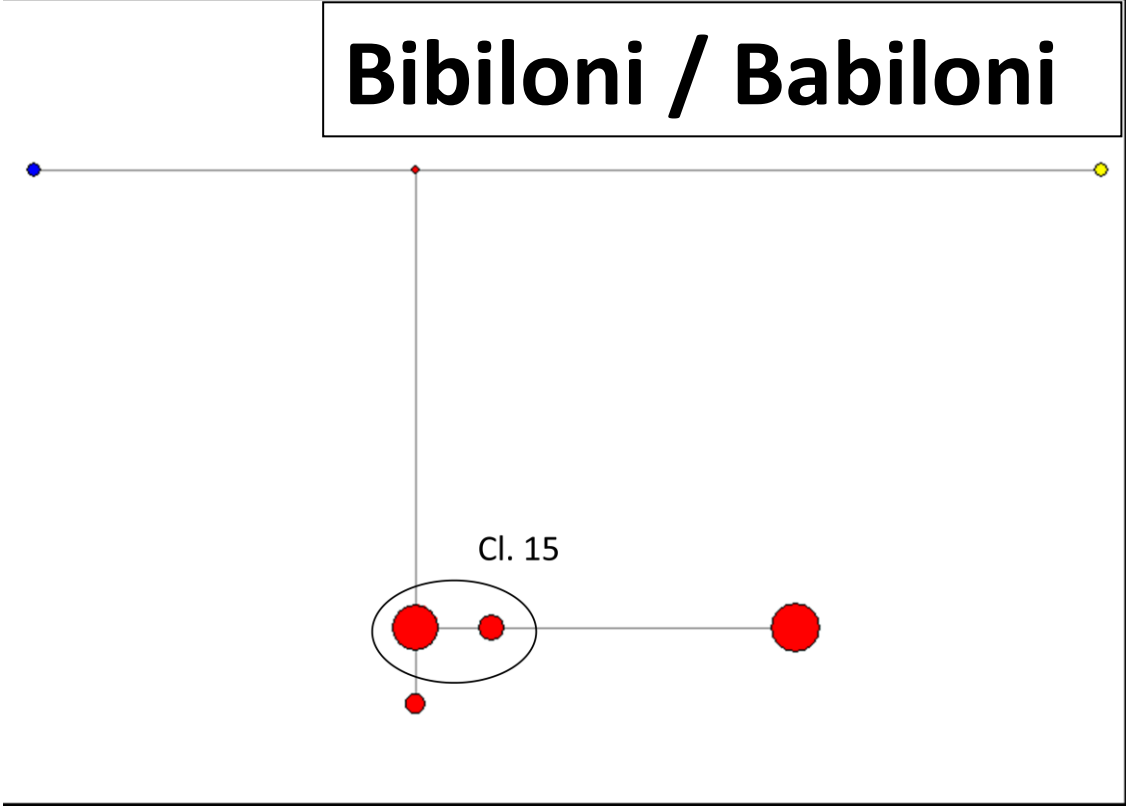

# Boluda

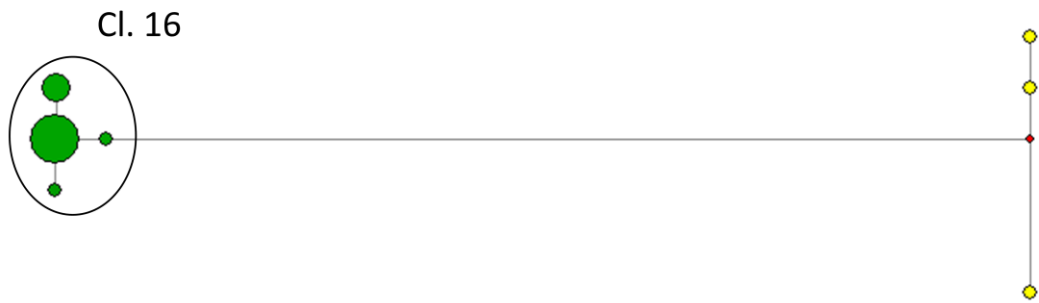

# Cadenas

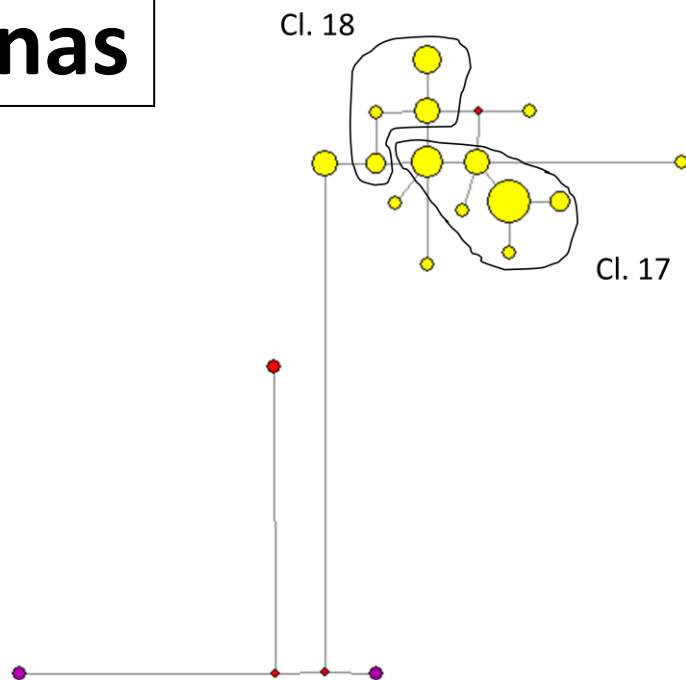

# Castell

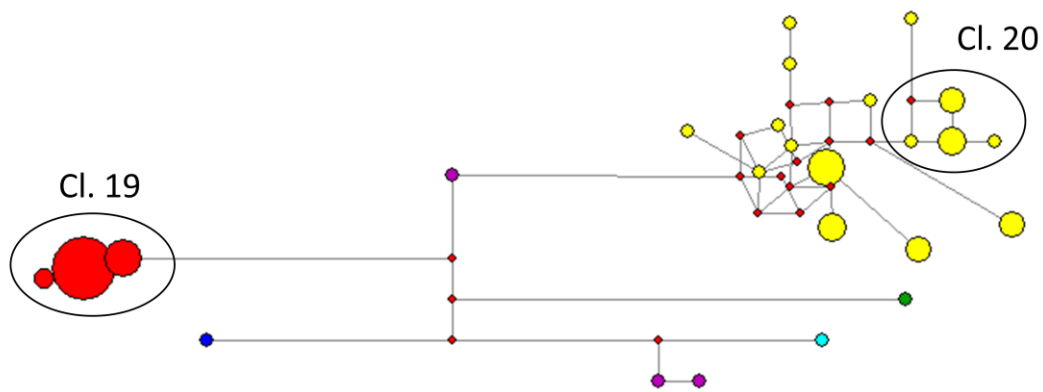

# Diez

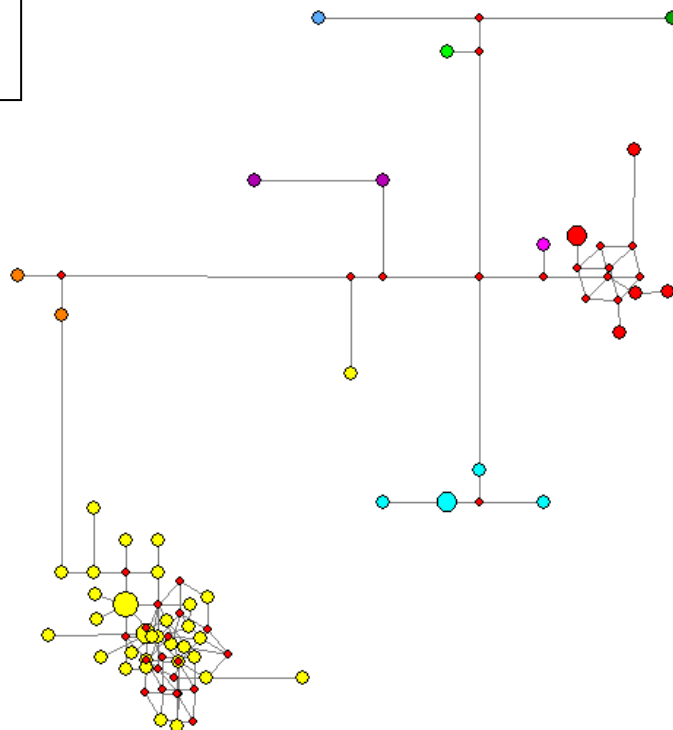

# Fernandez

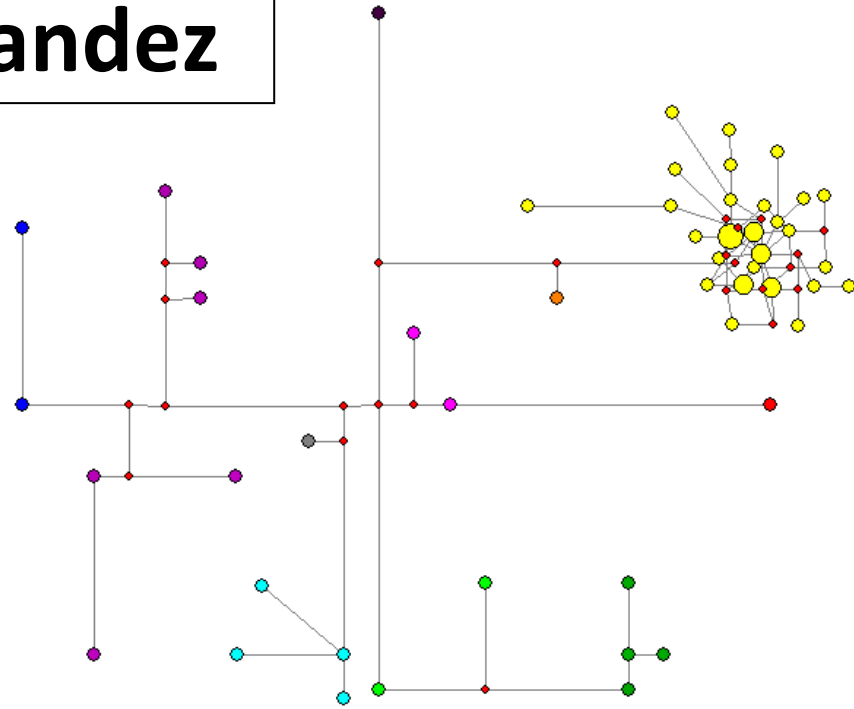

# Gordon

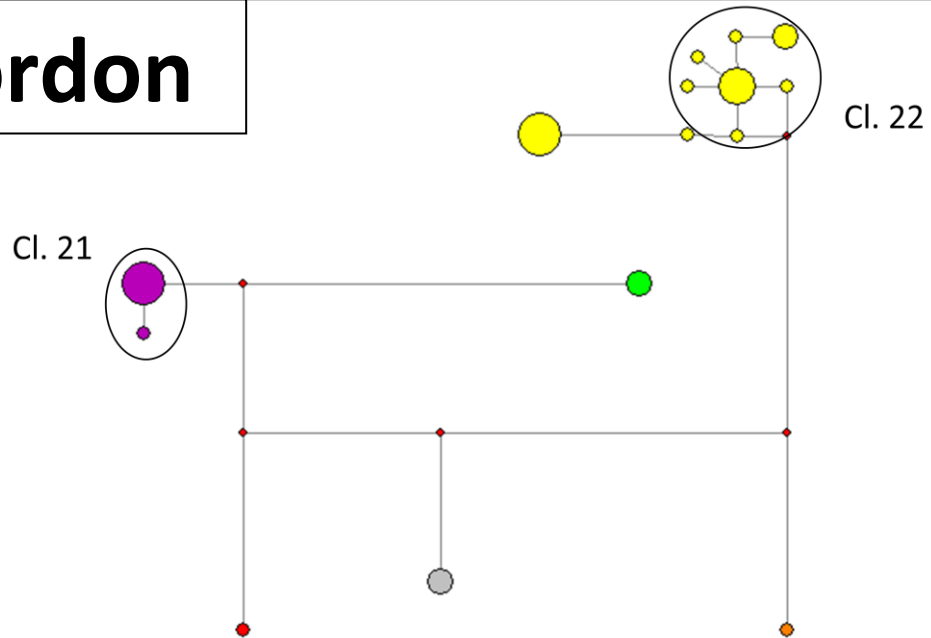

# Granell

Cl. 23

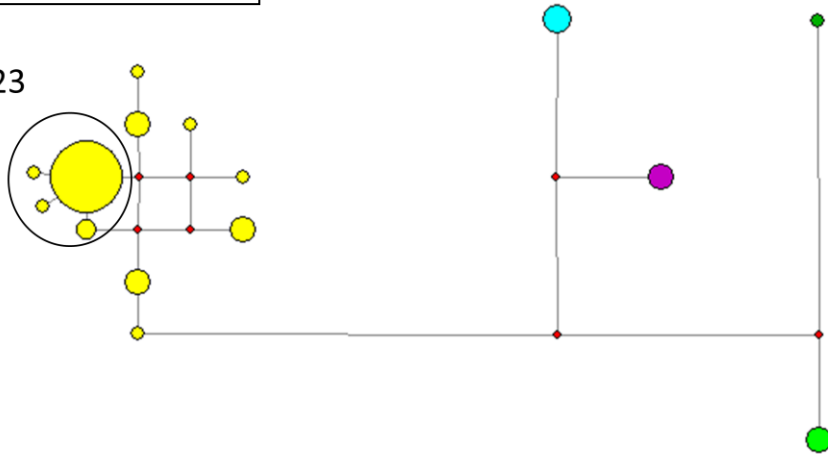

# Herrero

Cl. 24

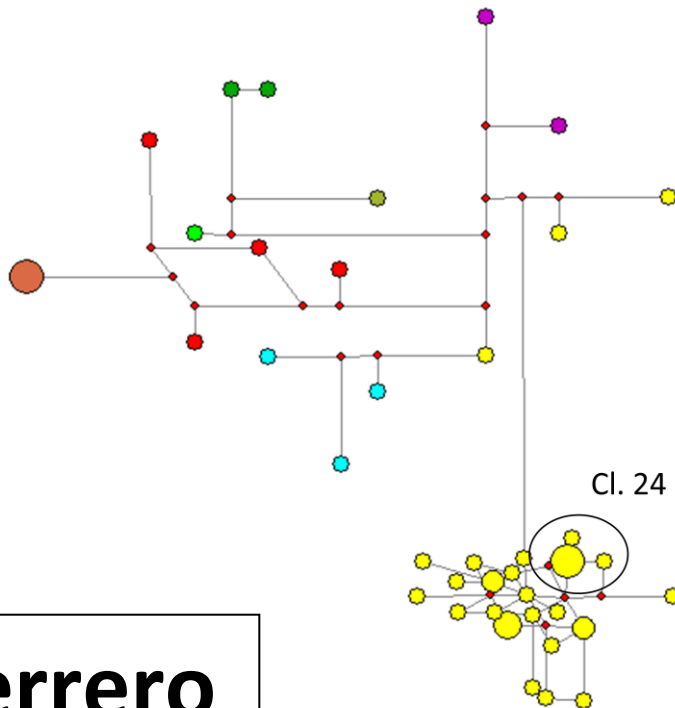



# Huguet

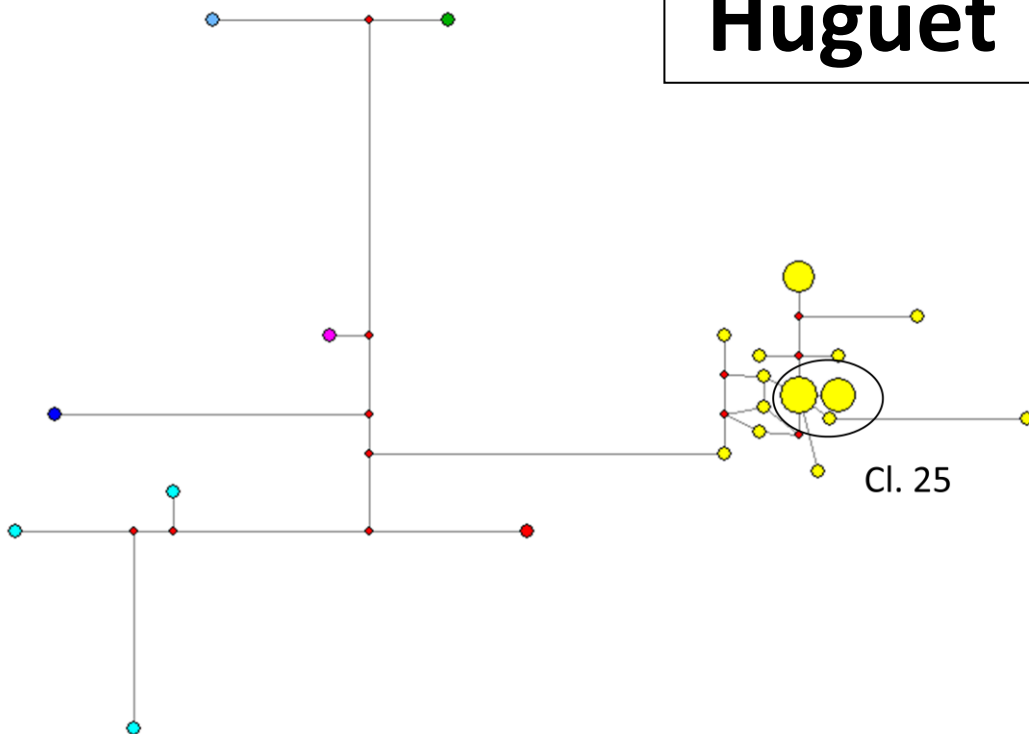

# Ibarra

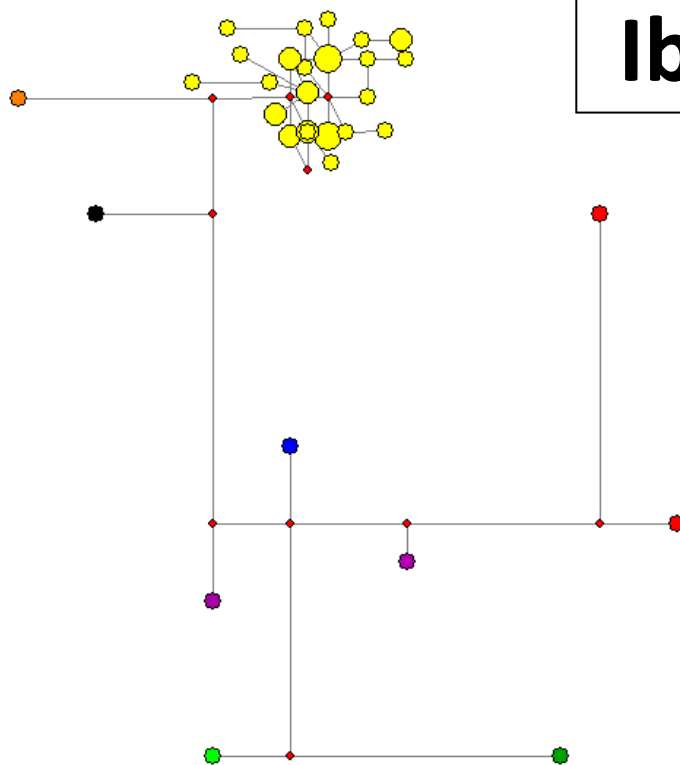



# Marques

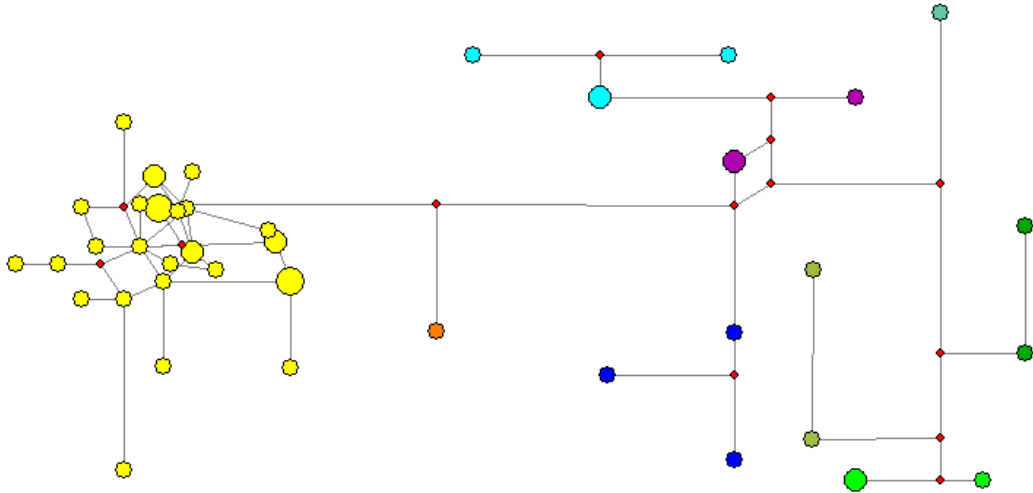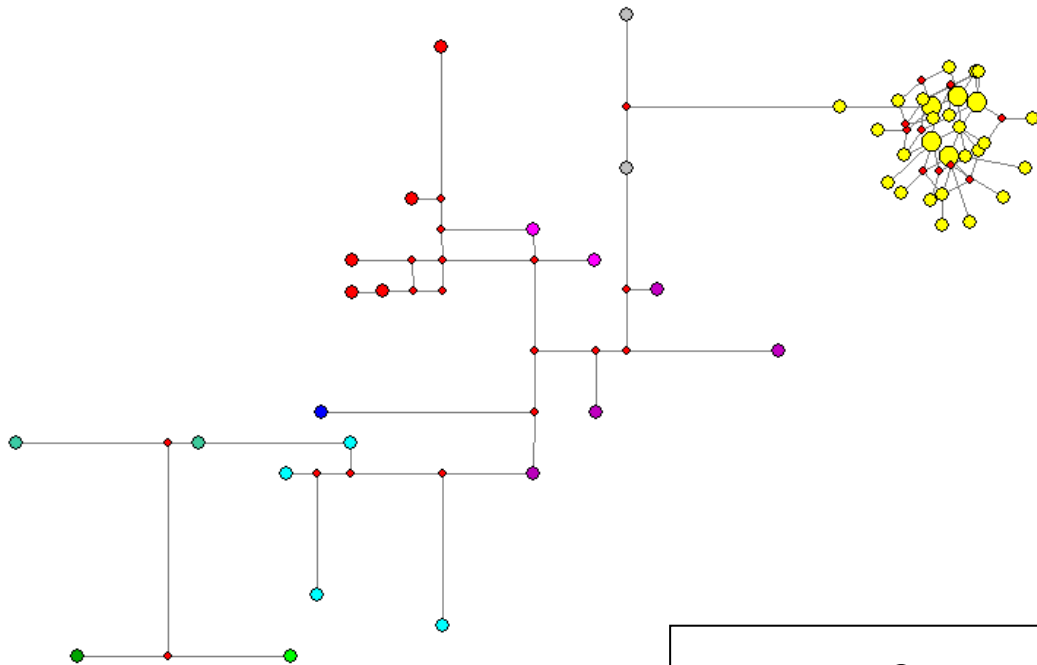

# Martinez

# Mateos

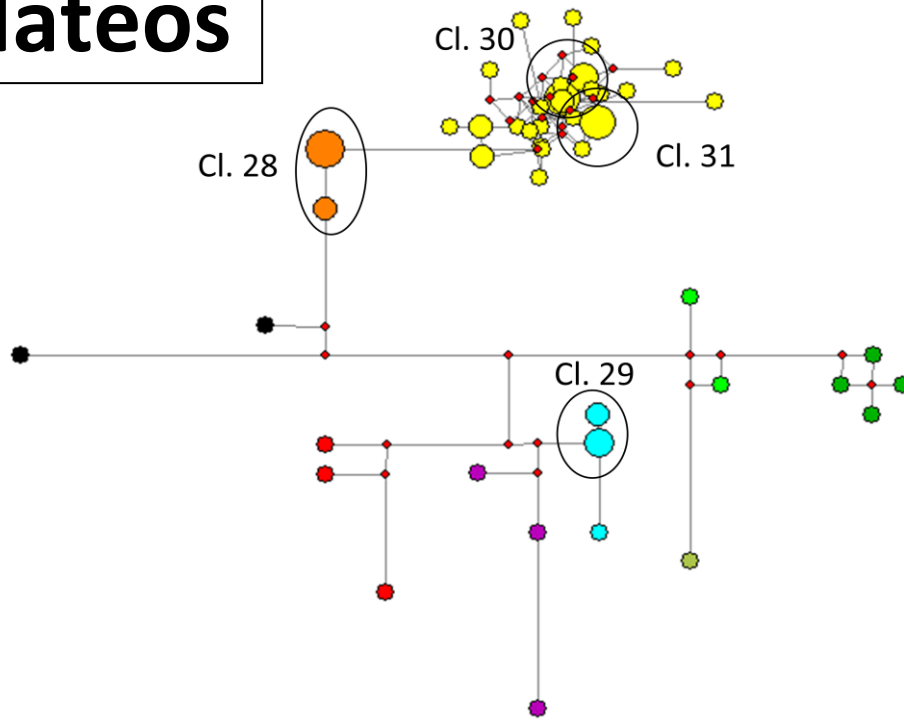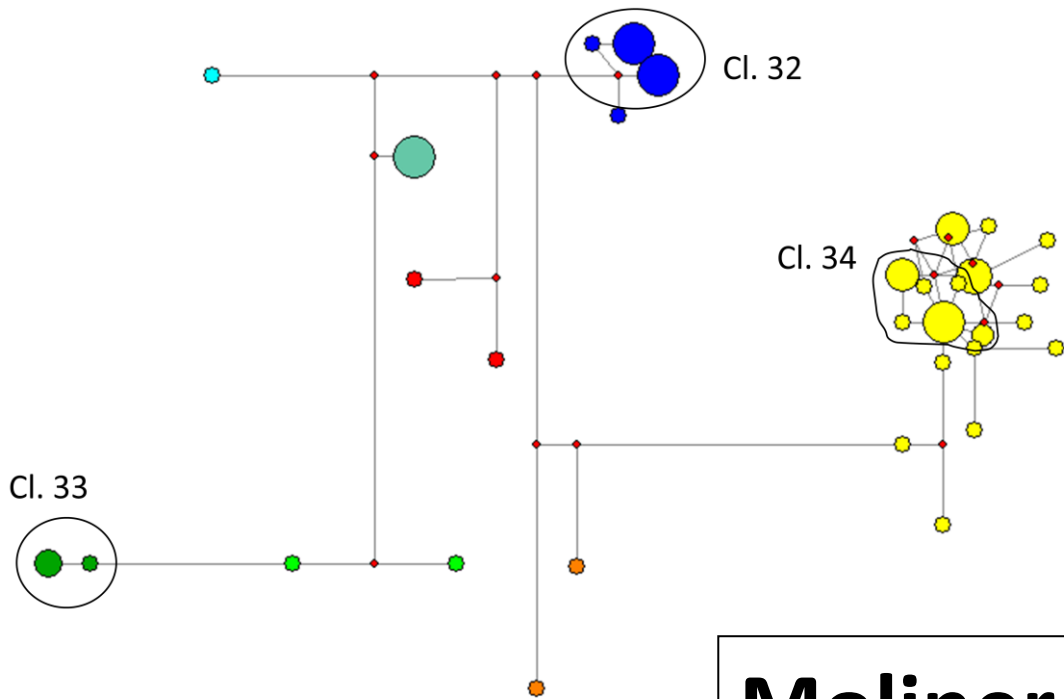

# Moliner

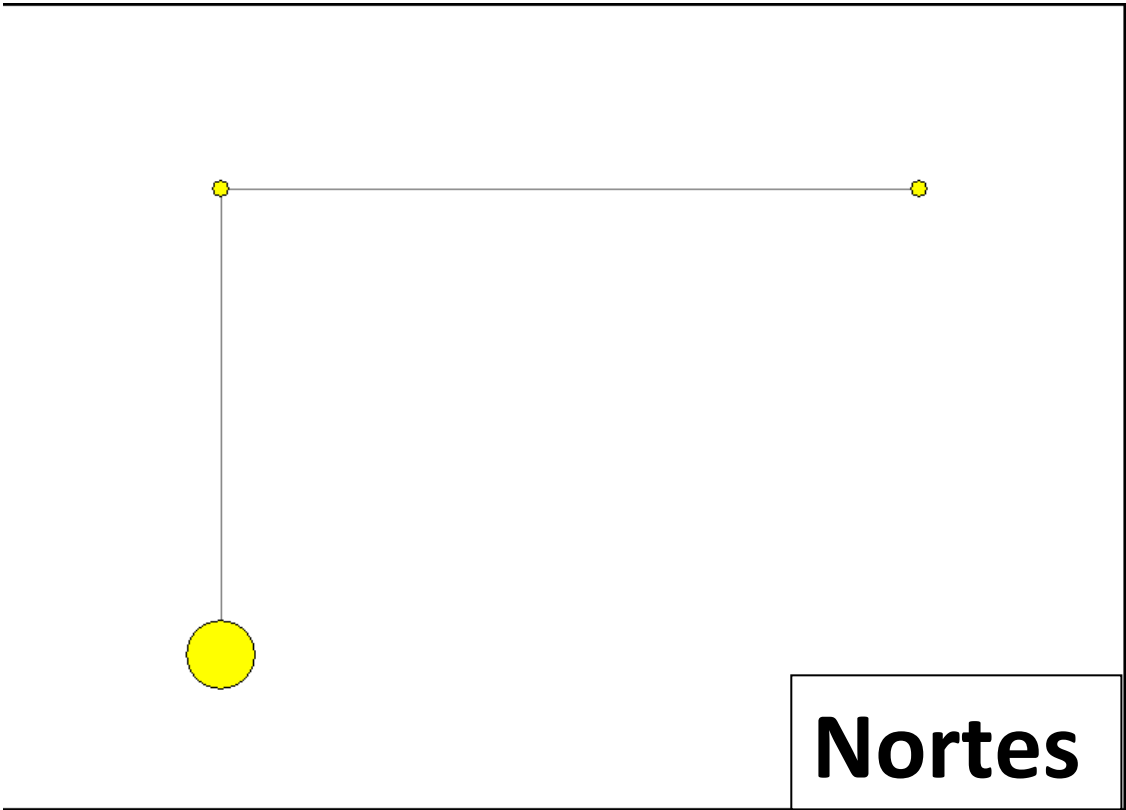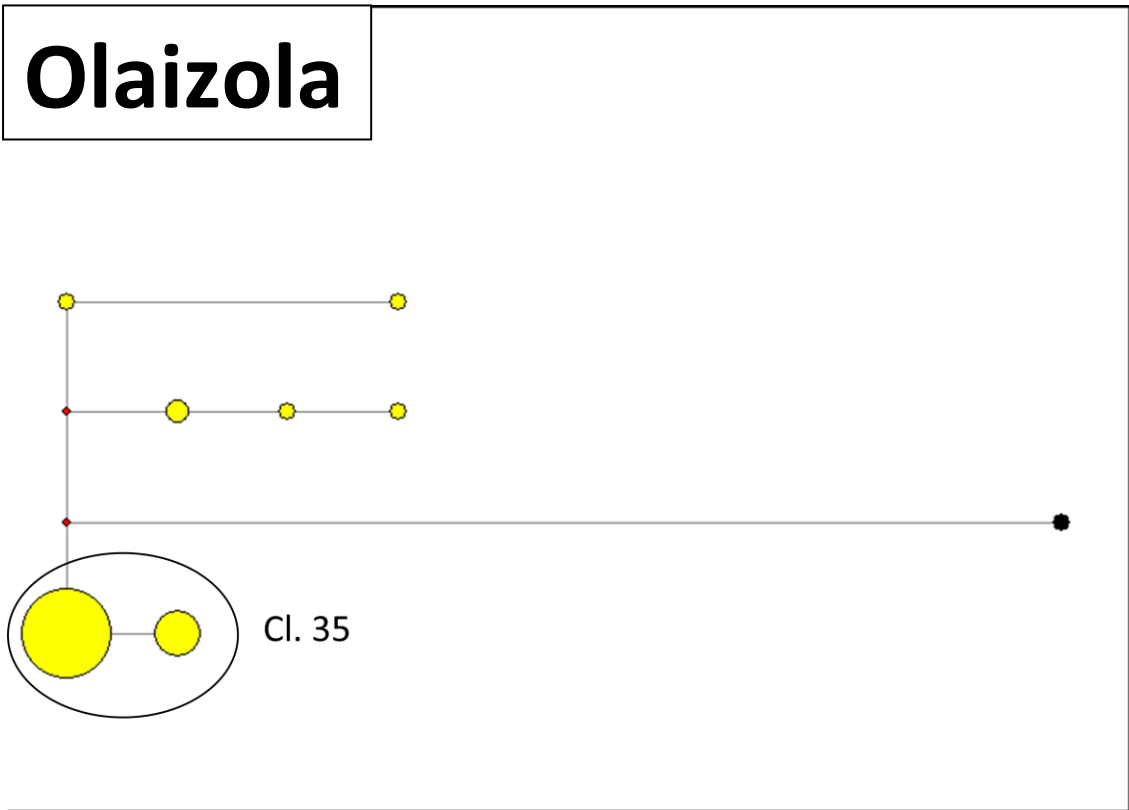

# Pascual

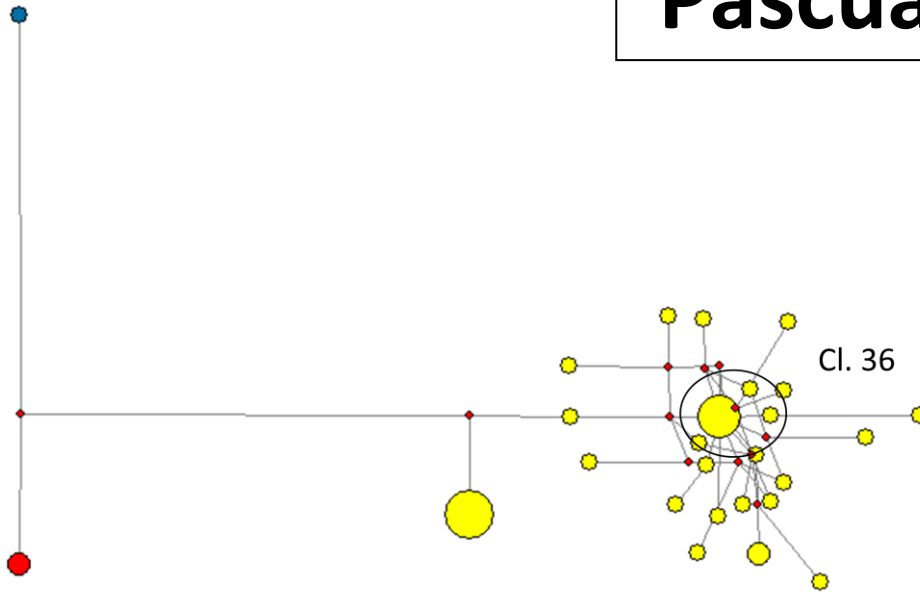

# Quevedo

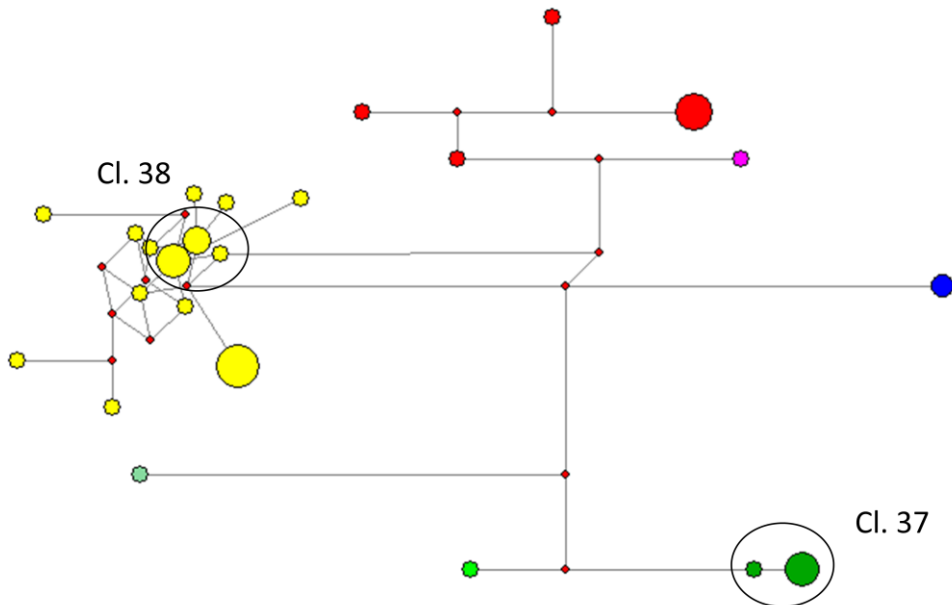

# Renau

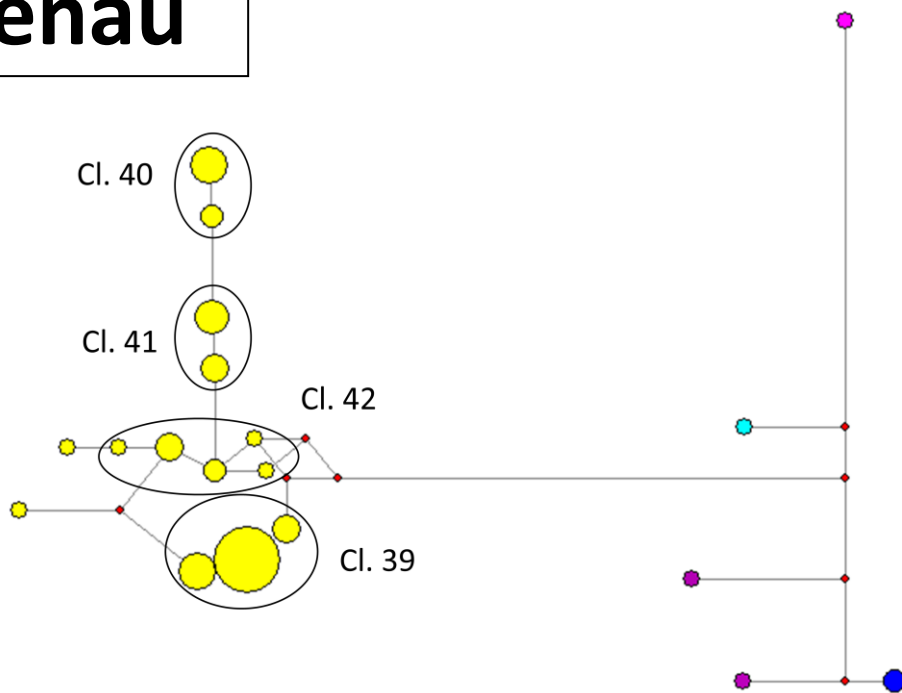

# Ribalta

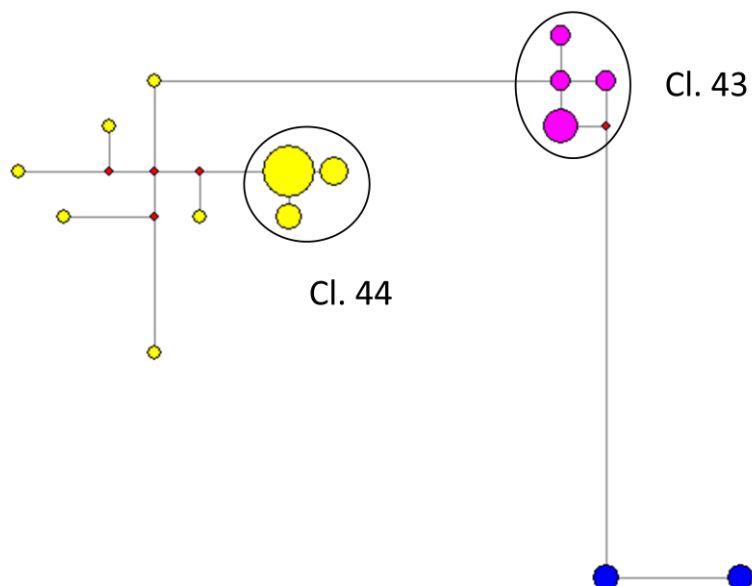

# Rubio

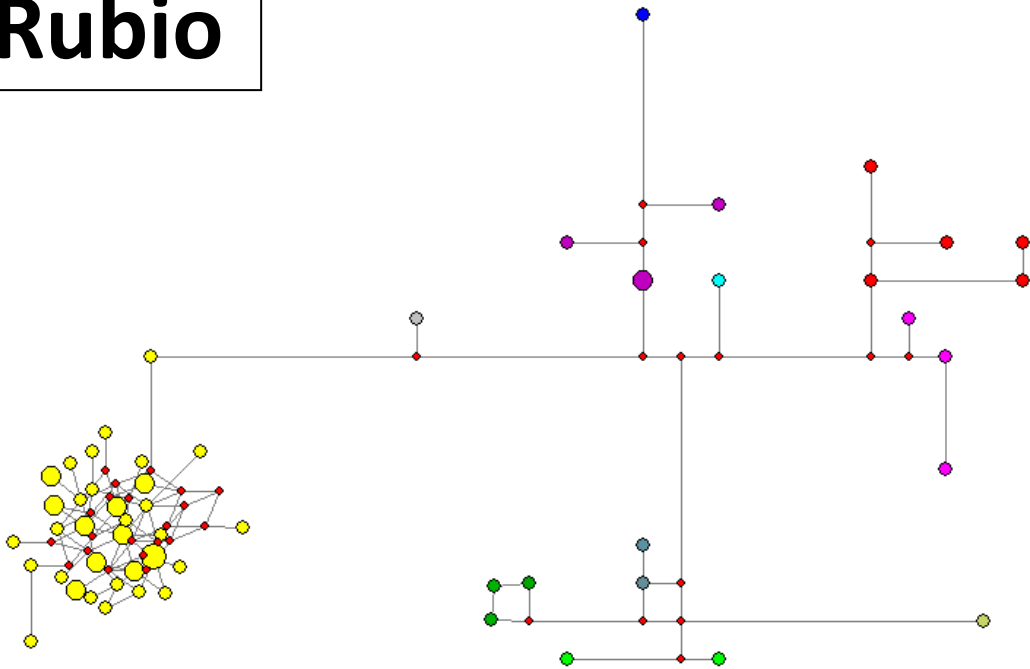

# Tirado

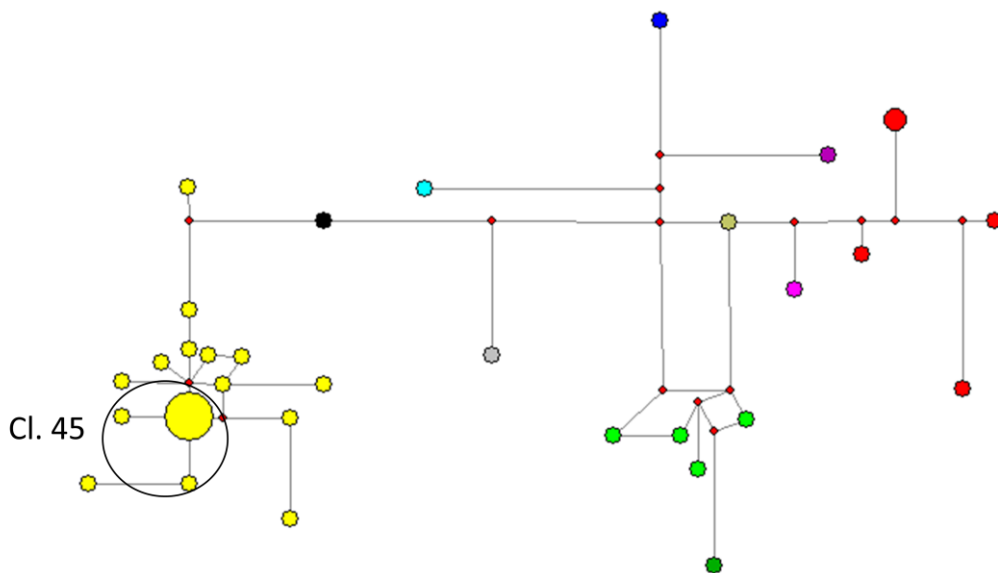



# Valbuena

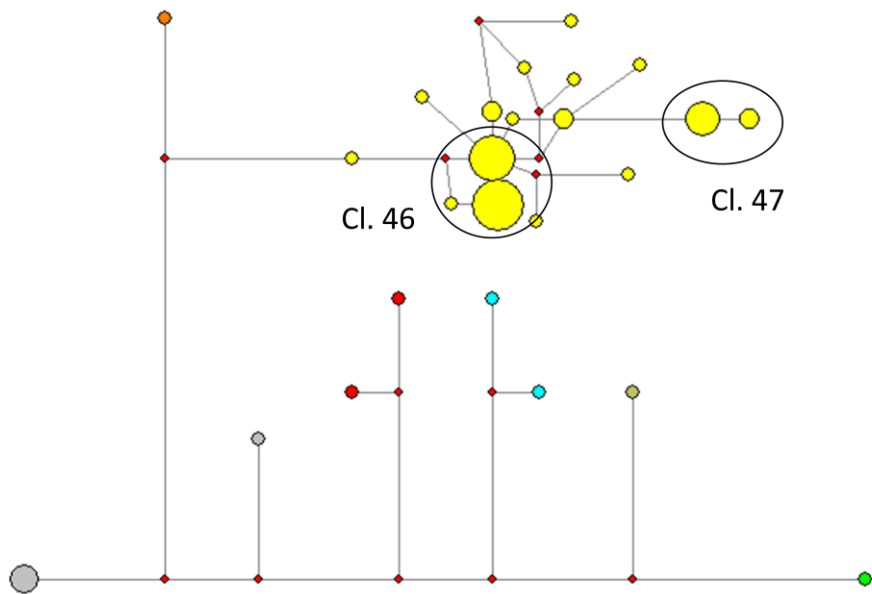

# Villarroel

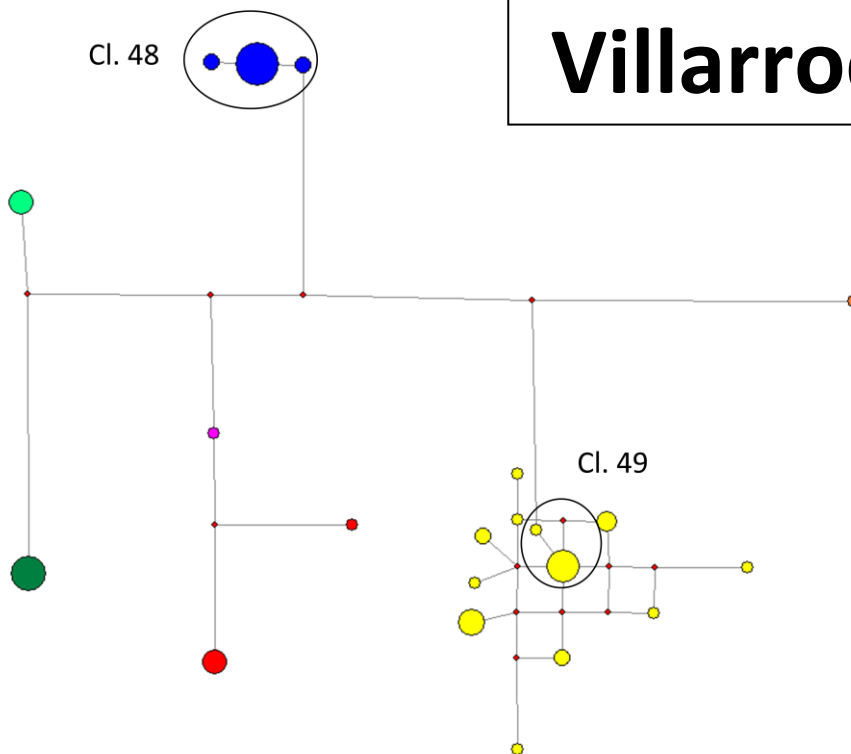

# ENGLAND

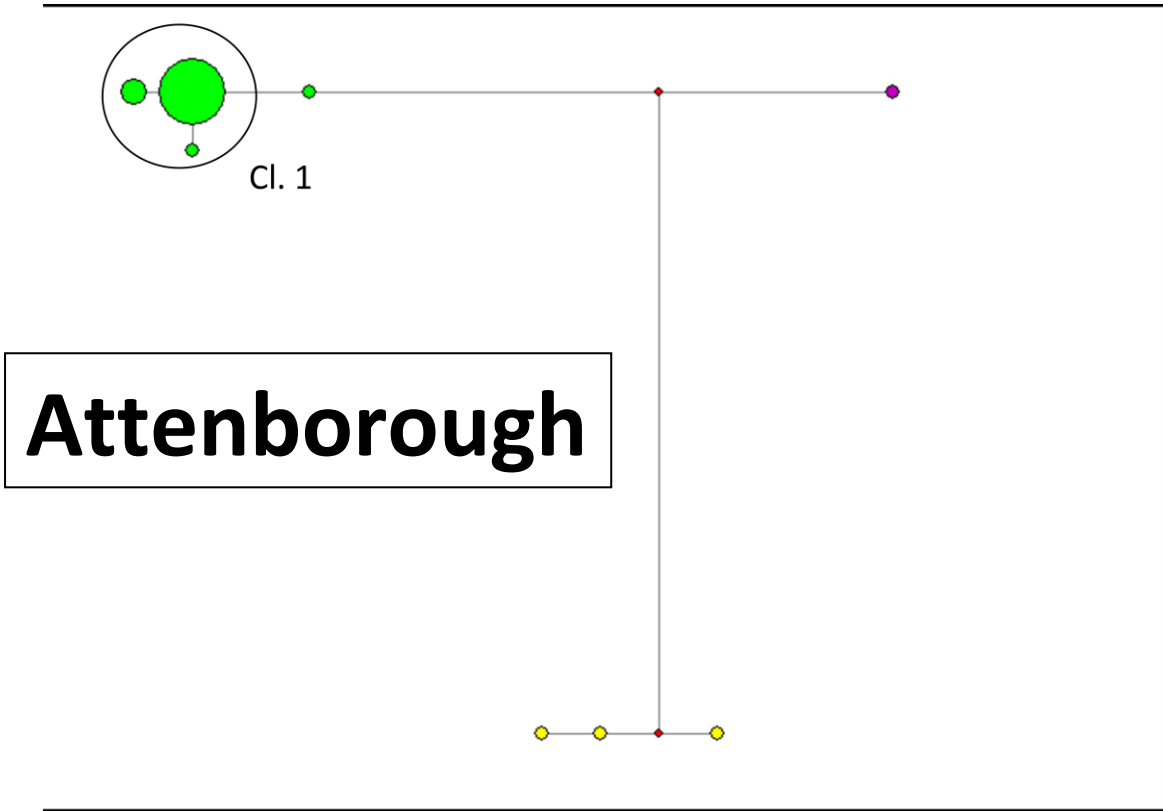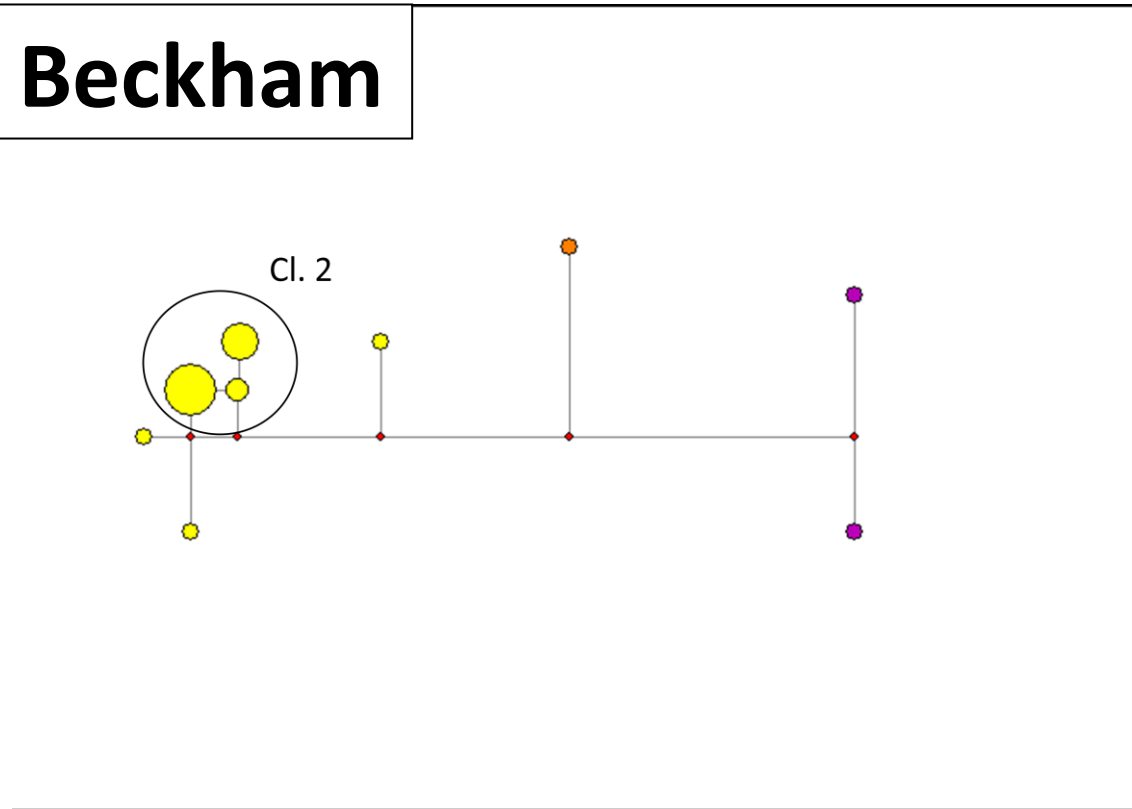

# Bray

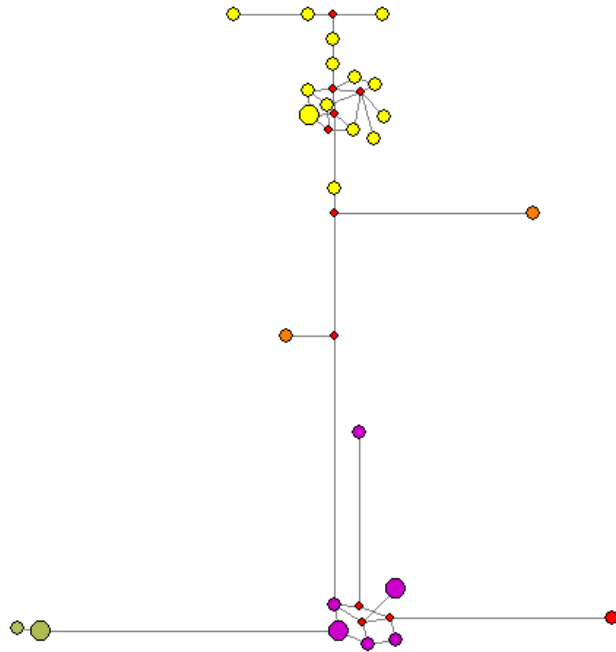

Cl. 4

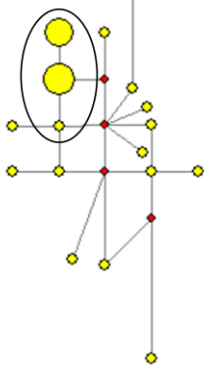

Cl. 3

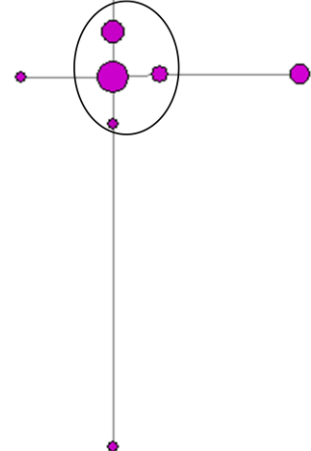

# Butterfield

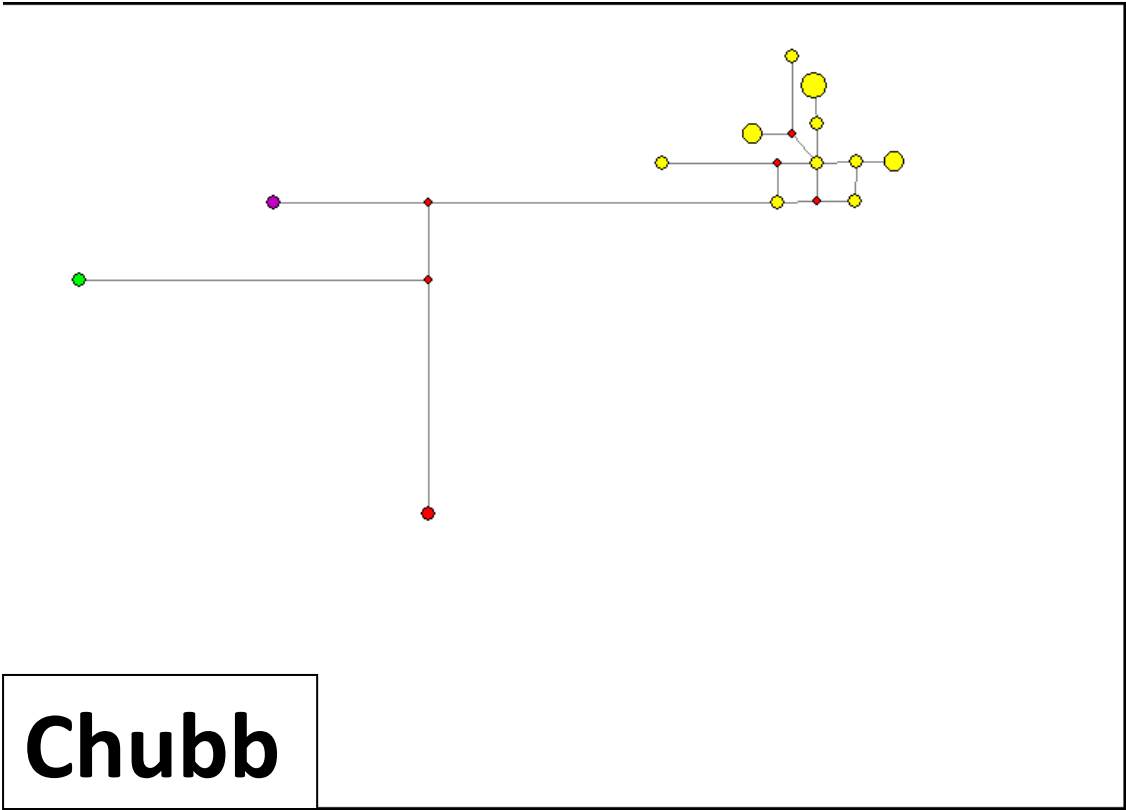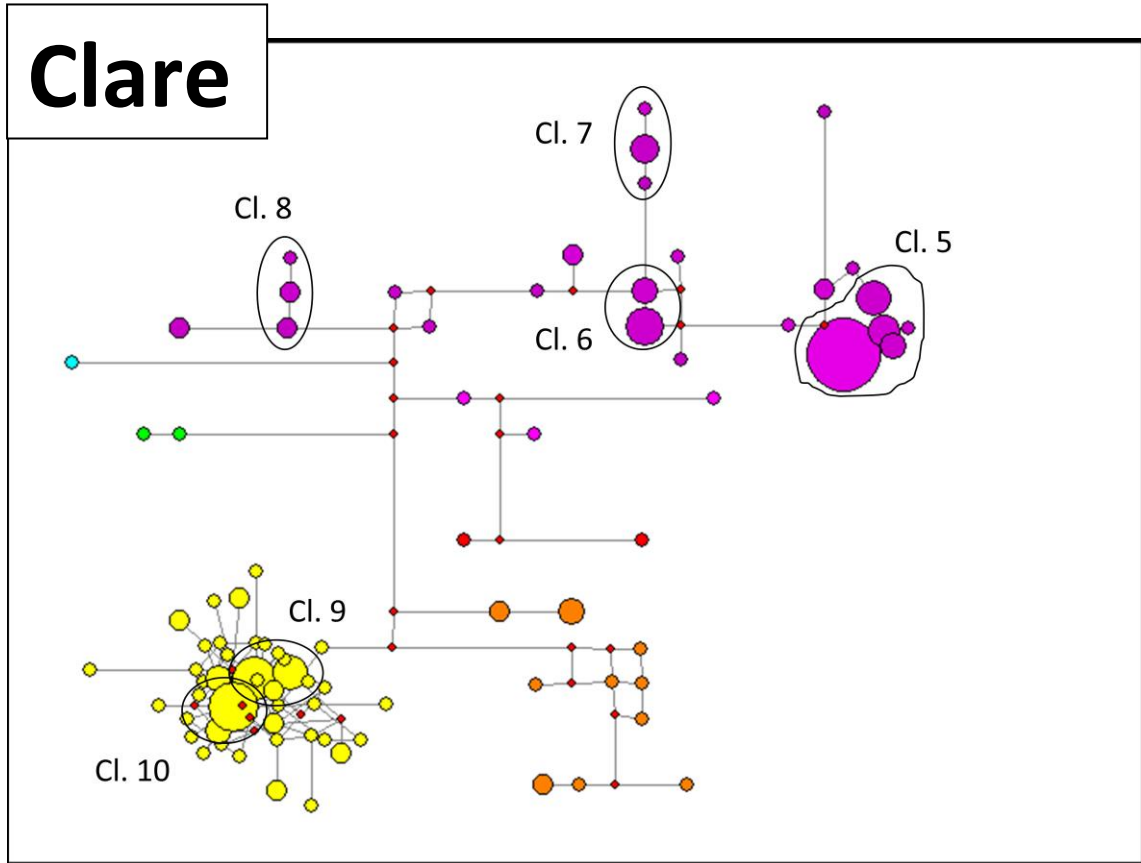

# Clemo

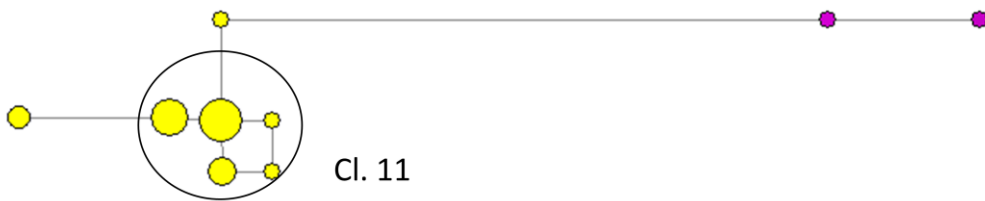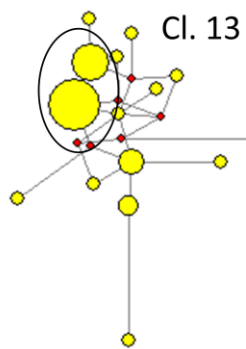

# Dalgleish

Cl. 12

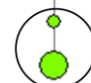



# Haythornthwaite

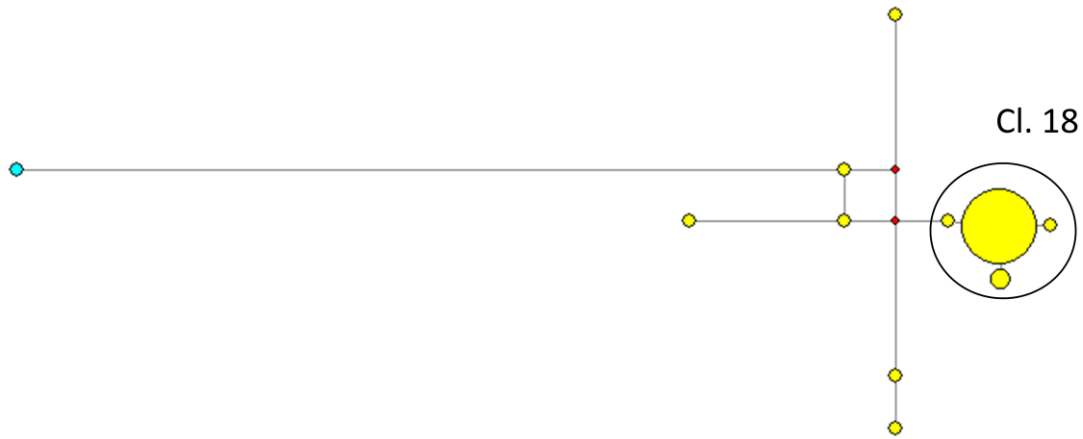

# Herrick

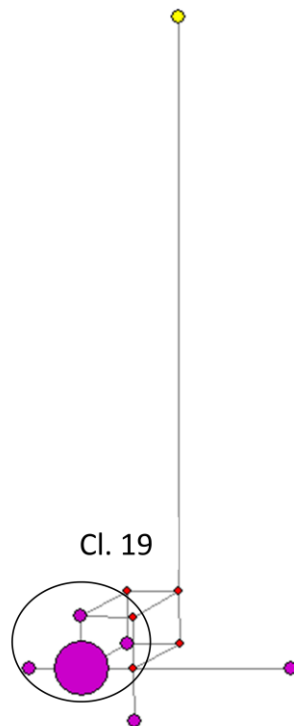

# Hey

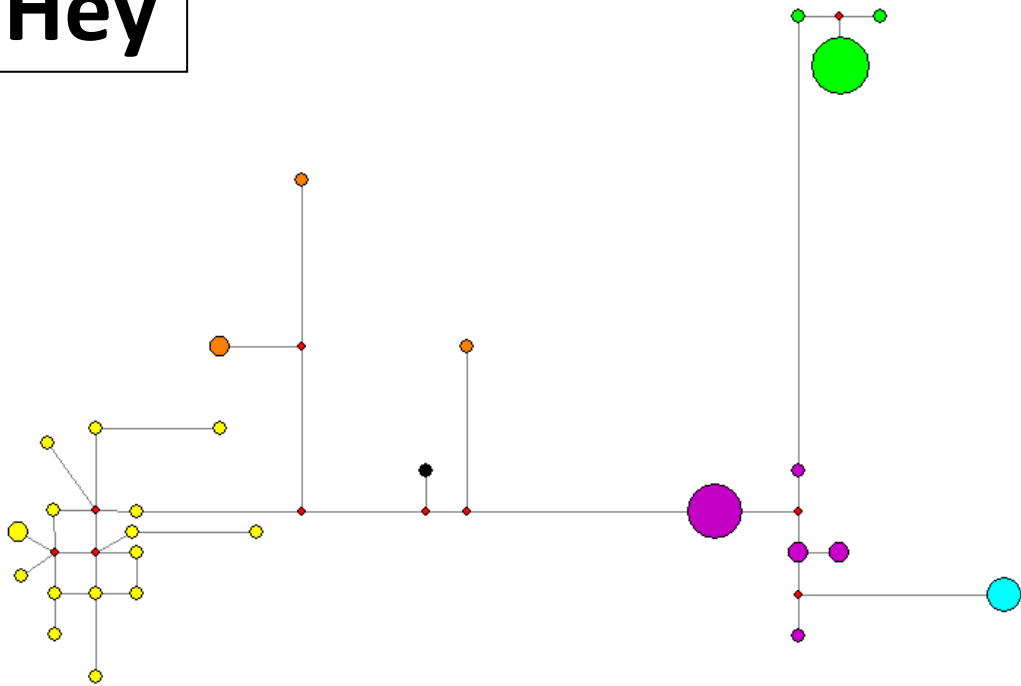

# Jefferson

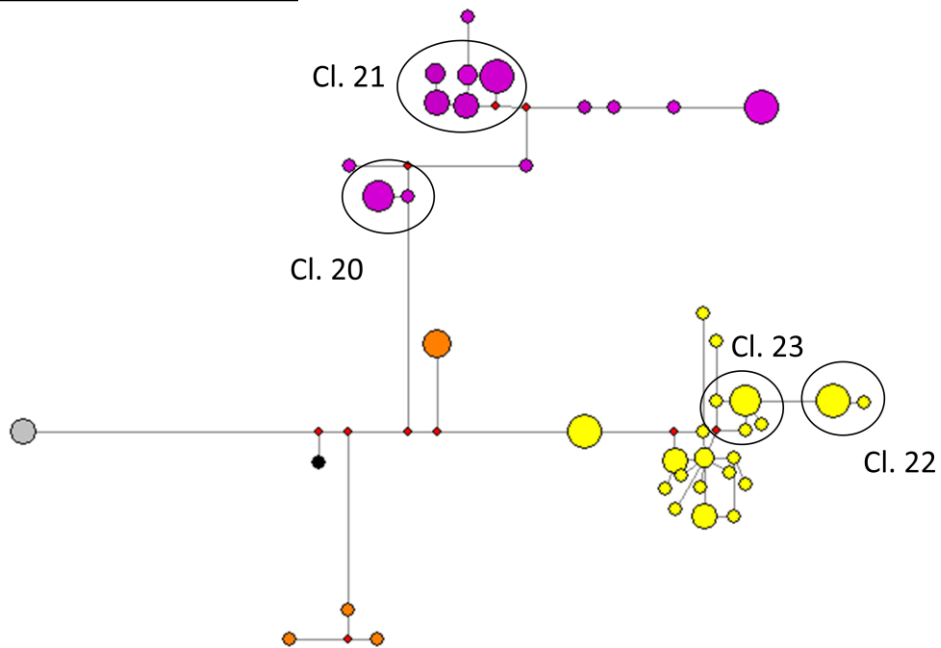



# Jeffreys

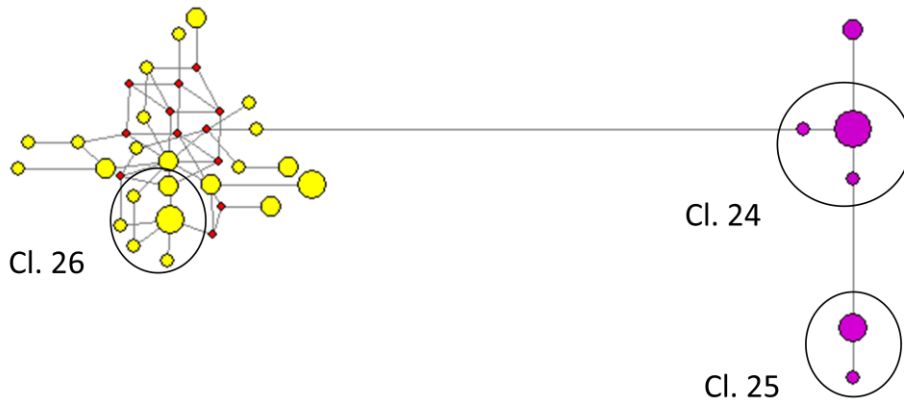

# Jobling

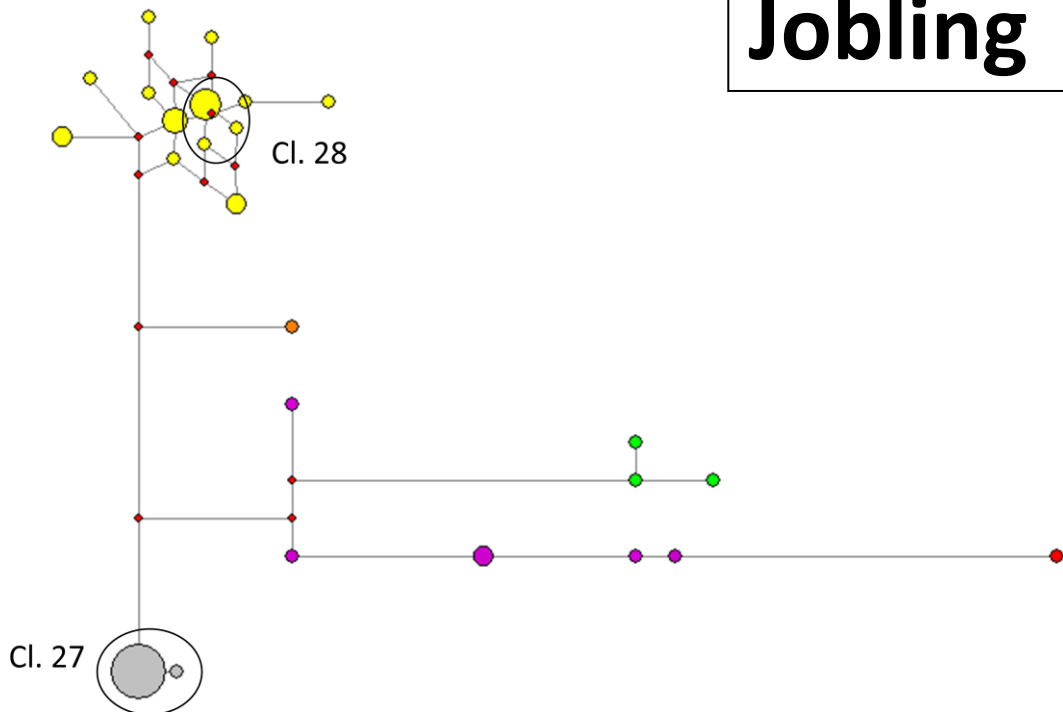

# Ketley

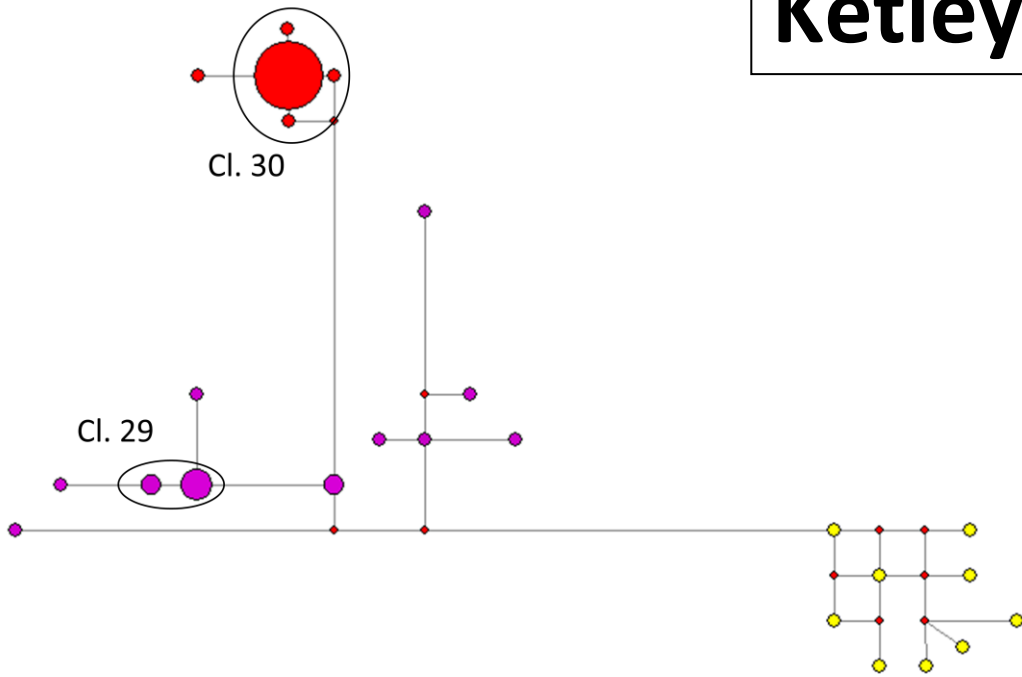

# King

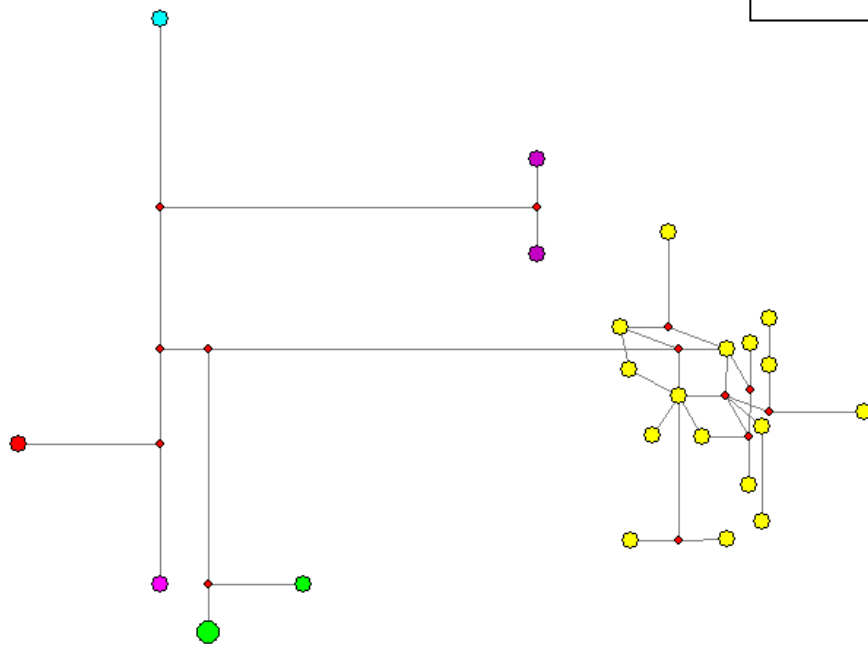

**Lauder**

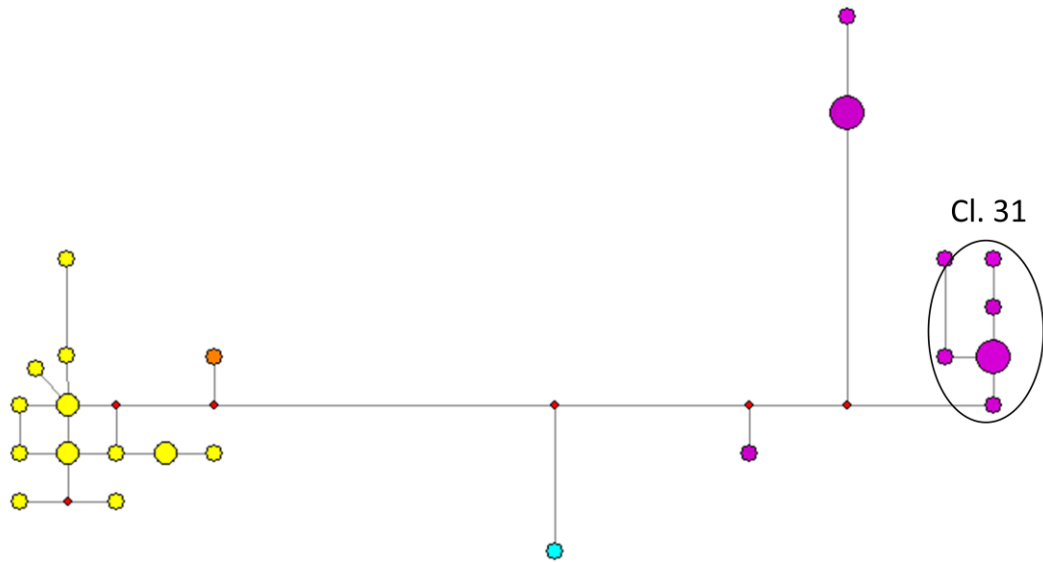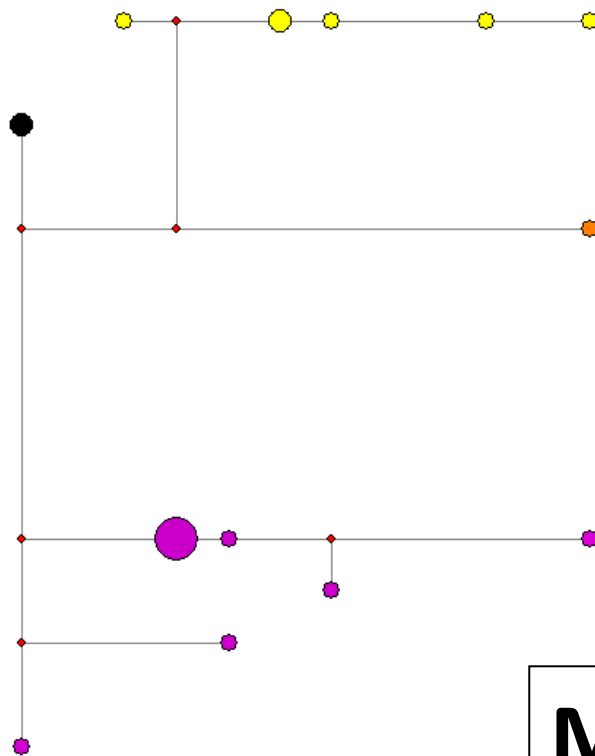

**Mallinson**





# Secker

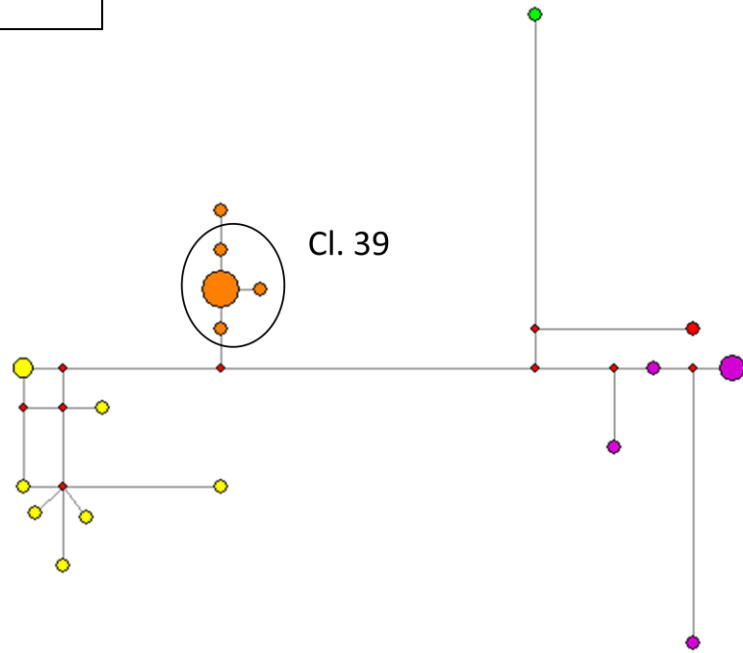

# Slingsby

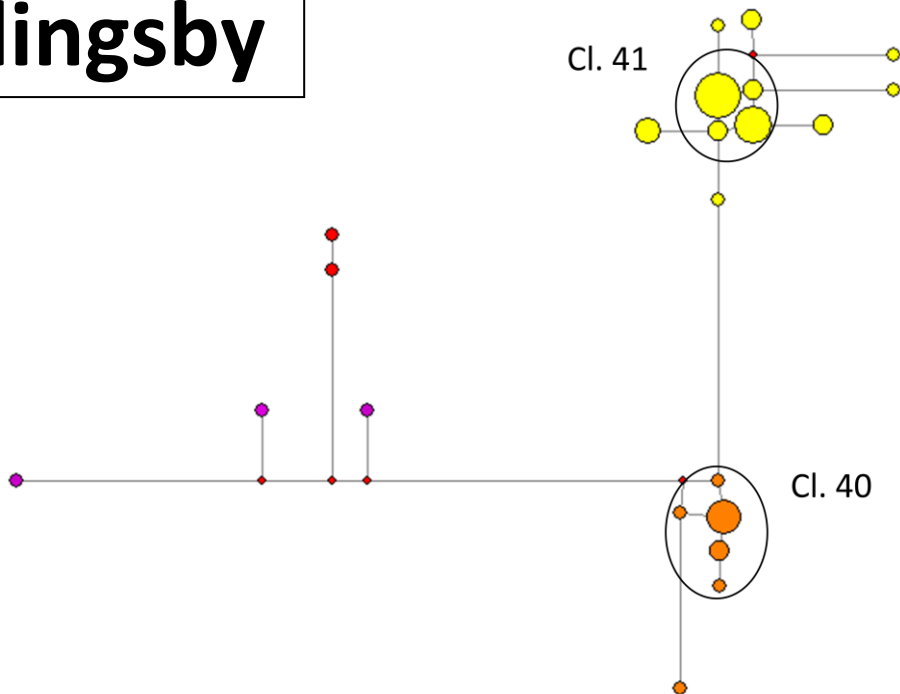

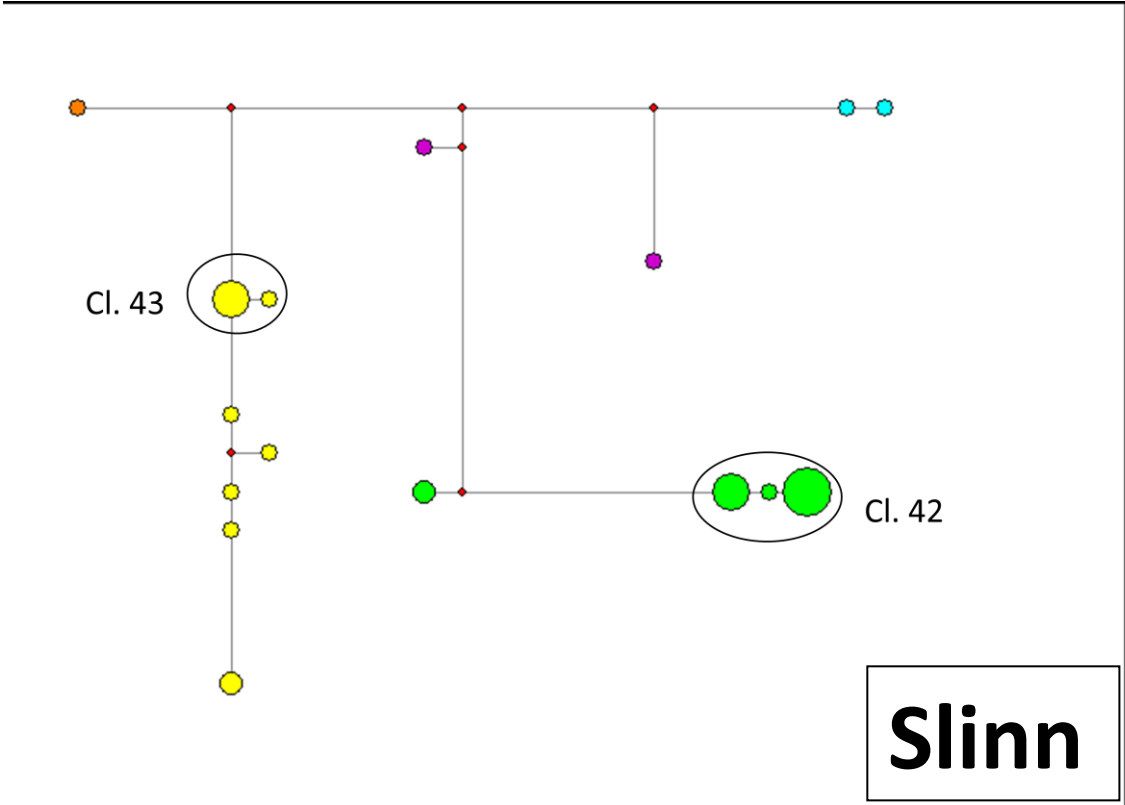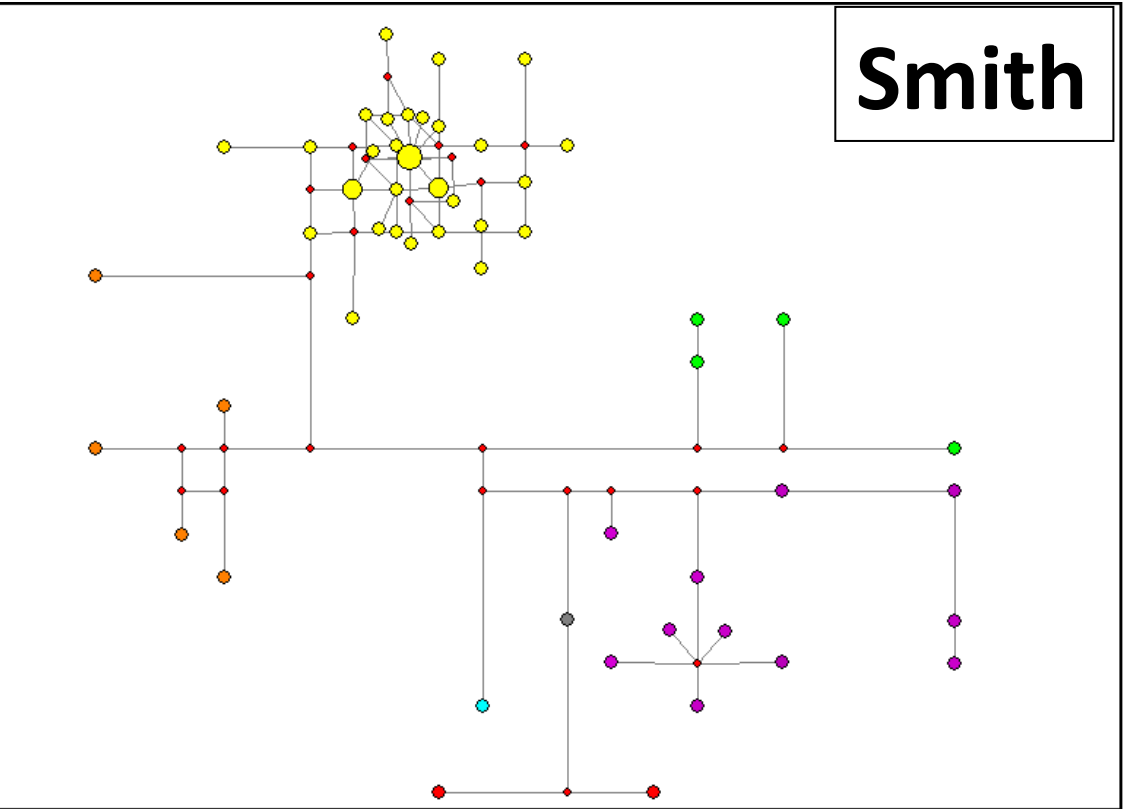

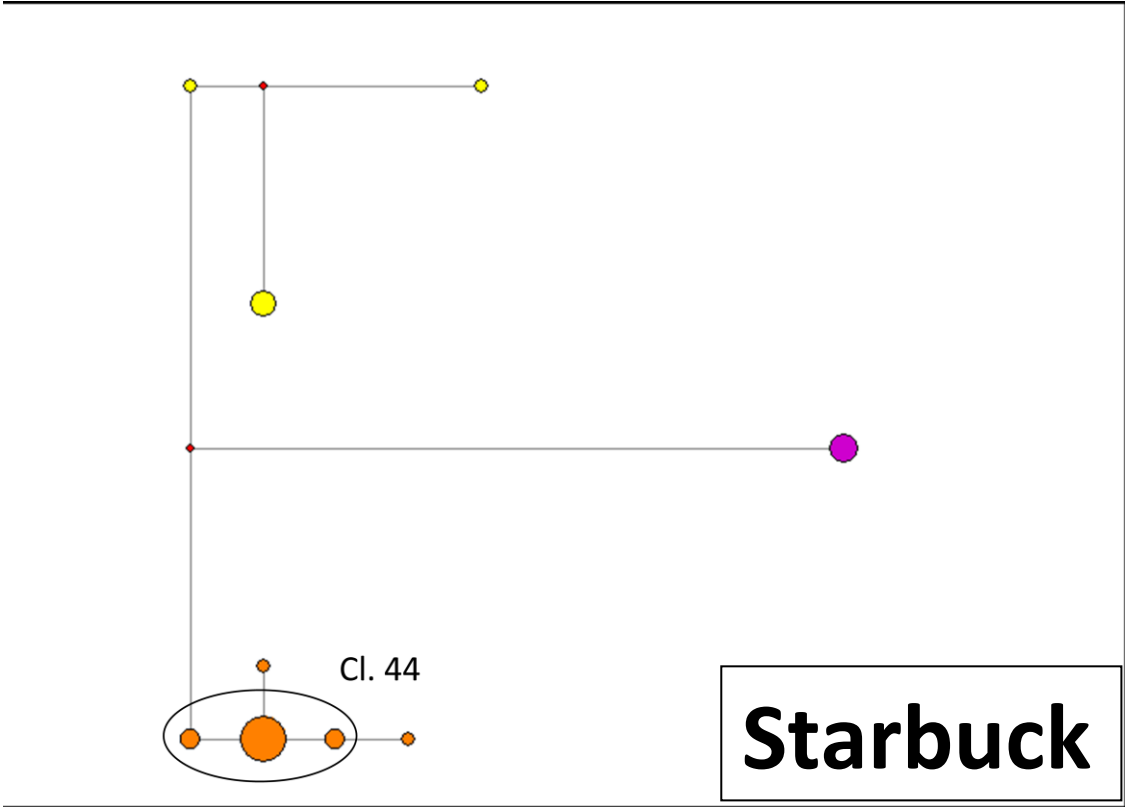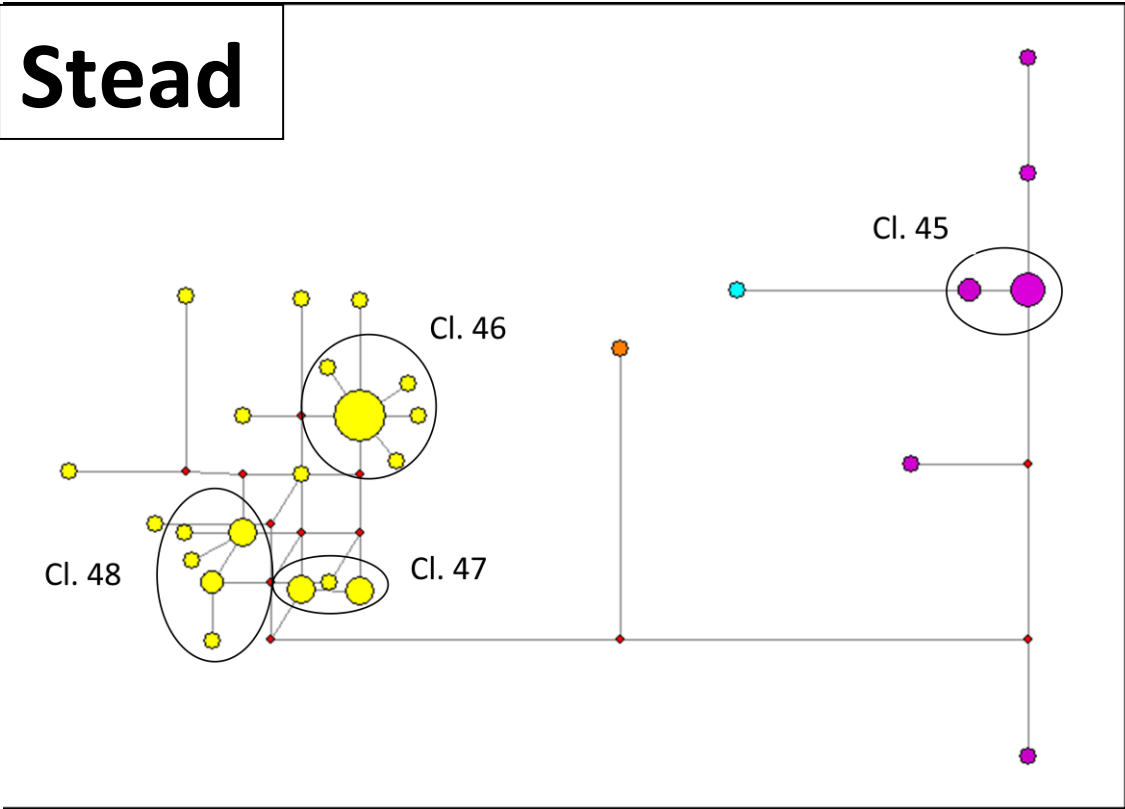



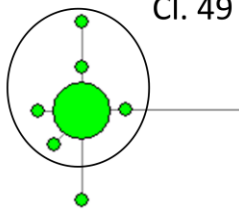

Cl. 49

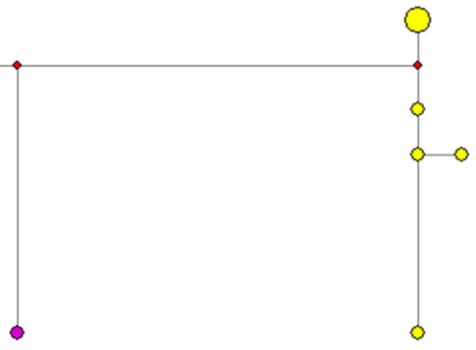

# Stribling

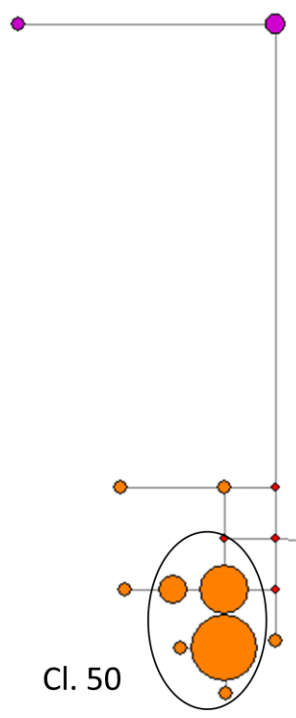

# Swindlehurst

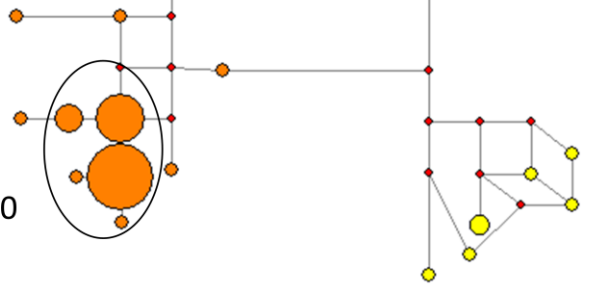

Cl. 50

# Titchmarsh

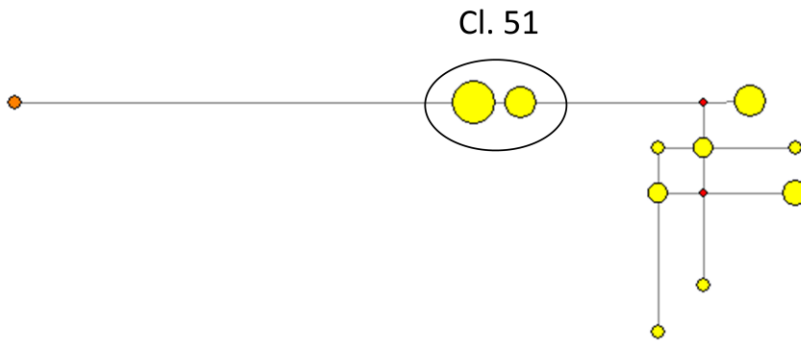

# Titmus

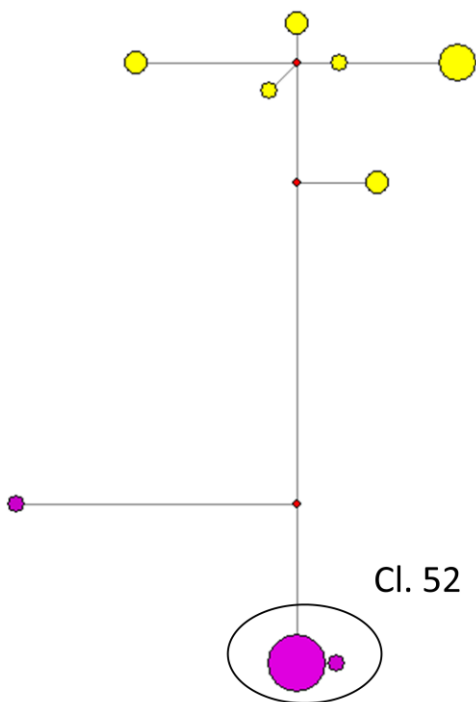

**Wadsworth**

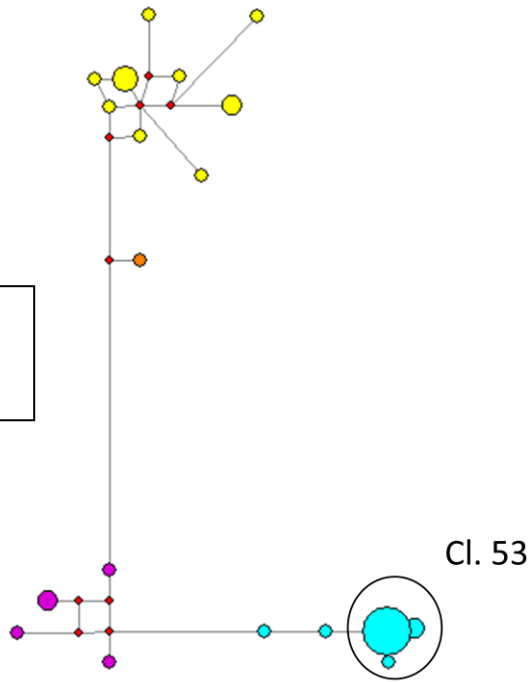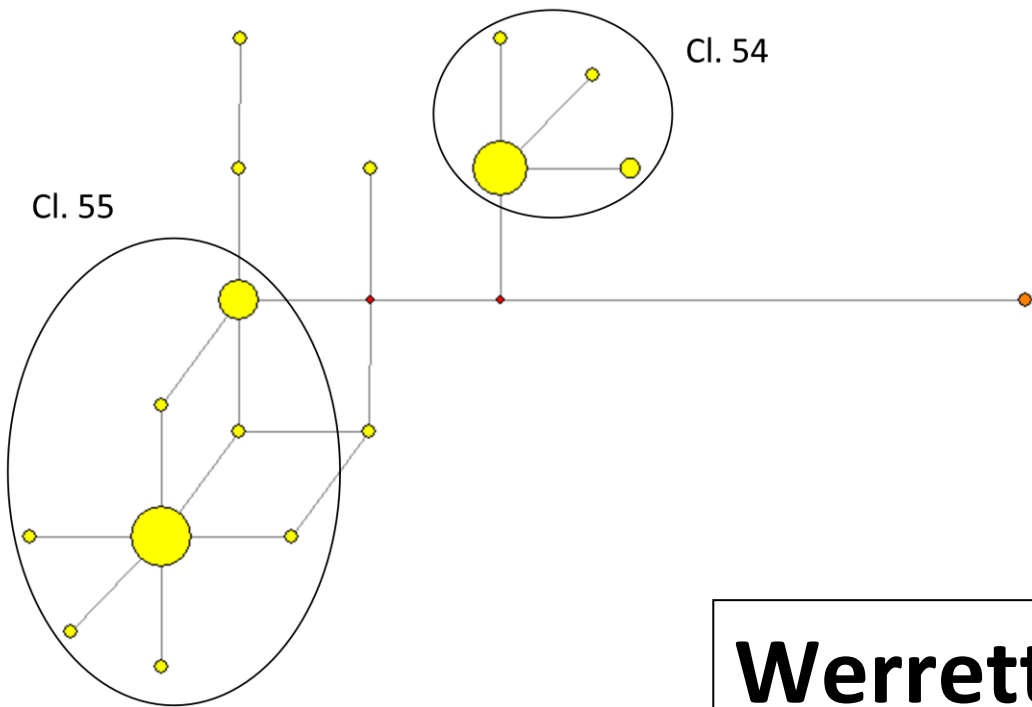

**Werrett**

# Widdowson

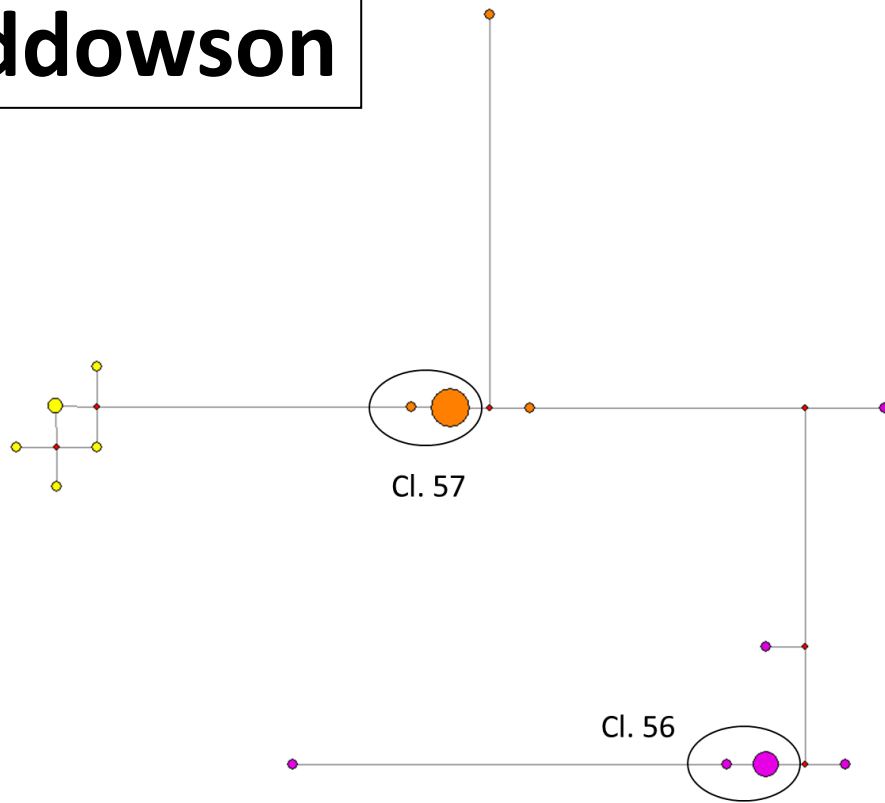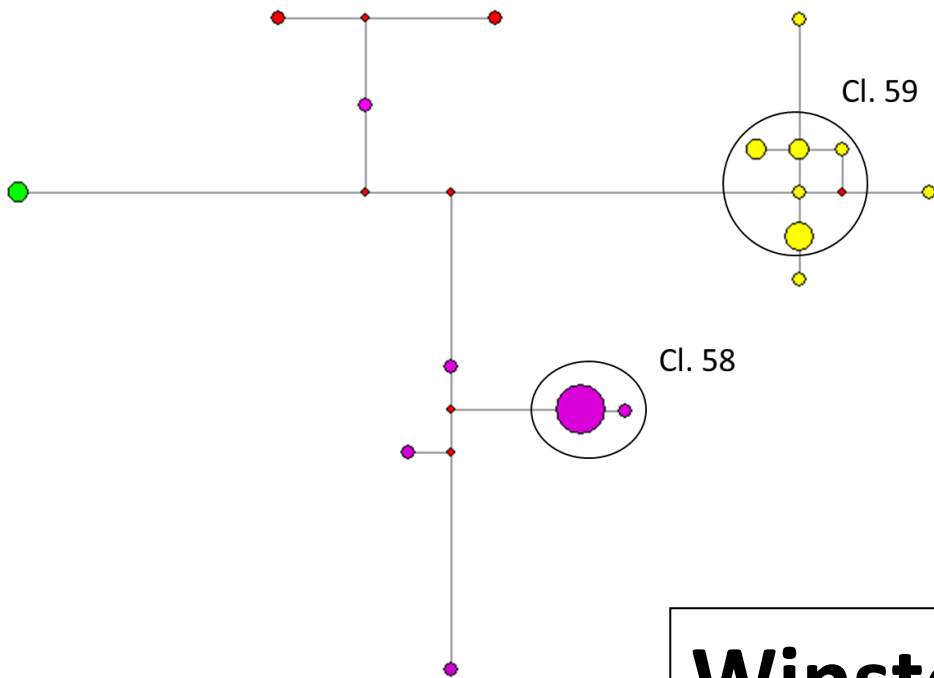

# Winstone

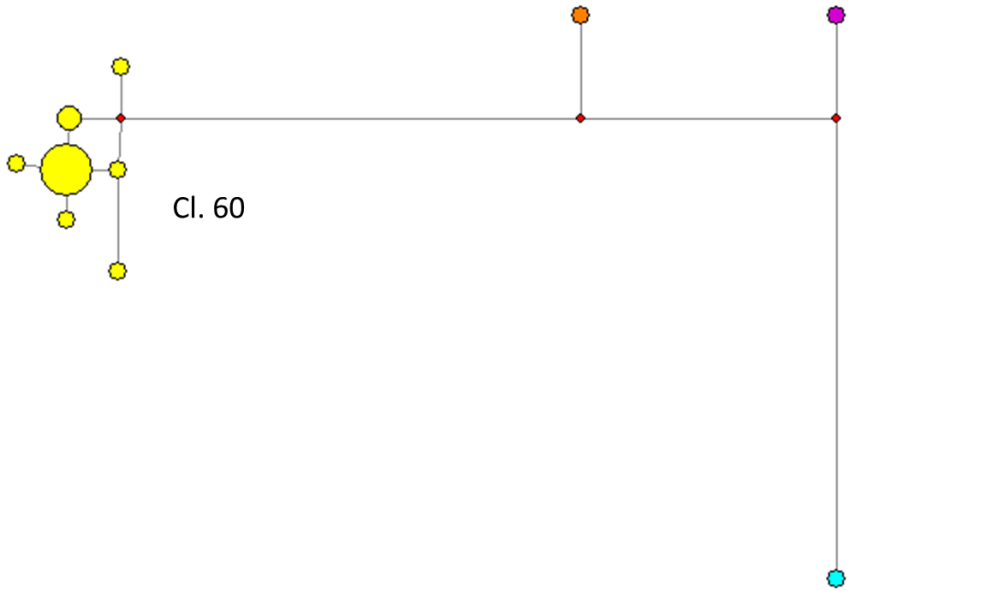

# Wordsworth

# IRELAND

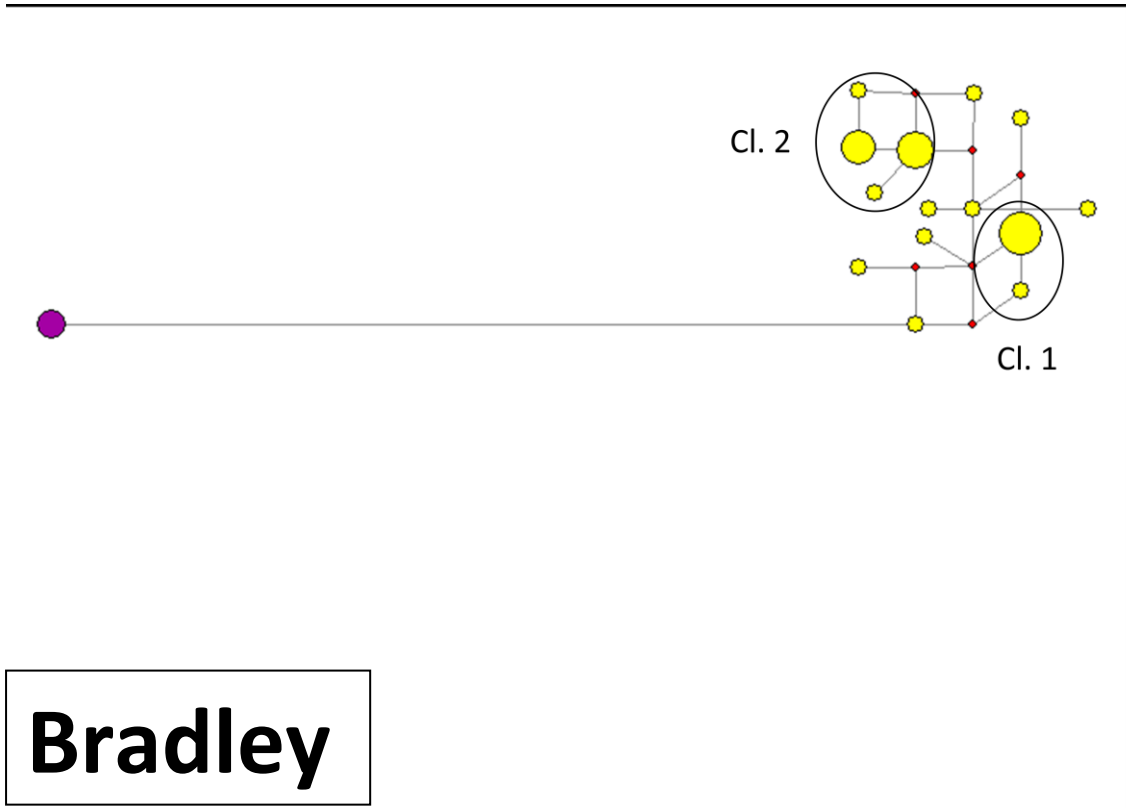

**Bradley**

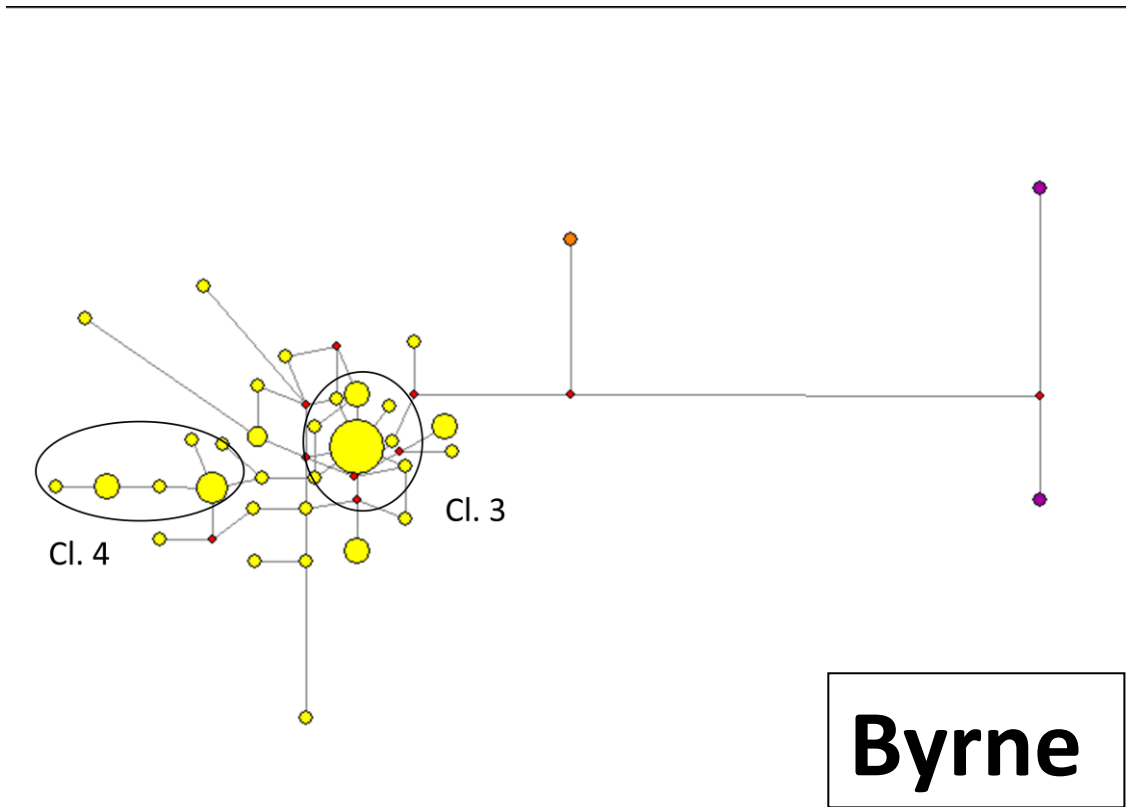

**Byrne**

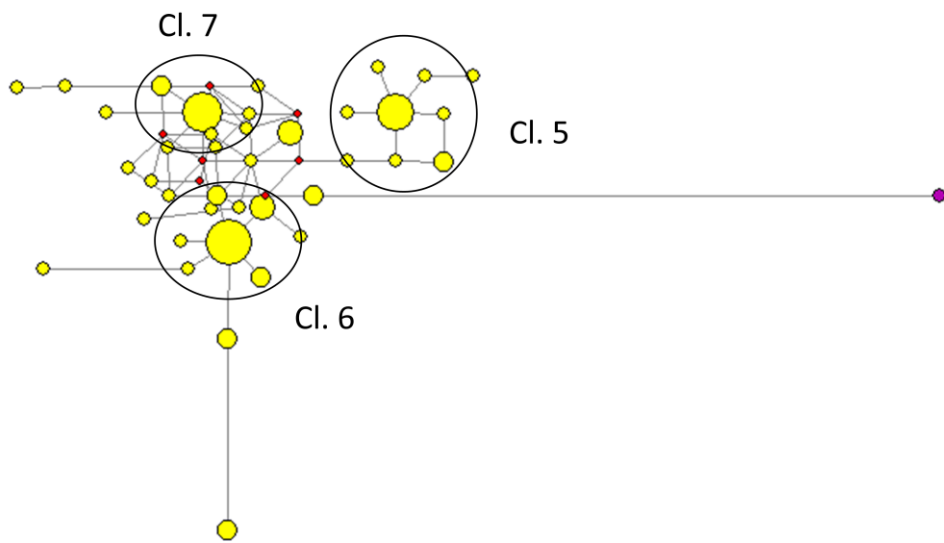

**Donohue**

**Egan**

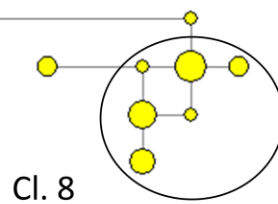

# Haughey

Cl. 9

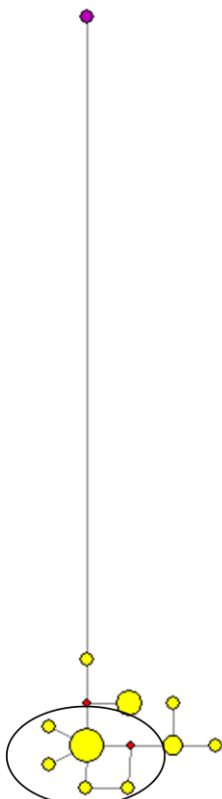

# Heaney

Cl. 10

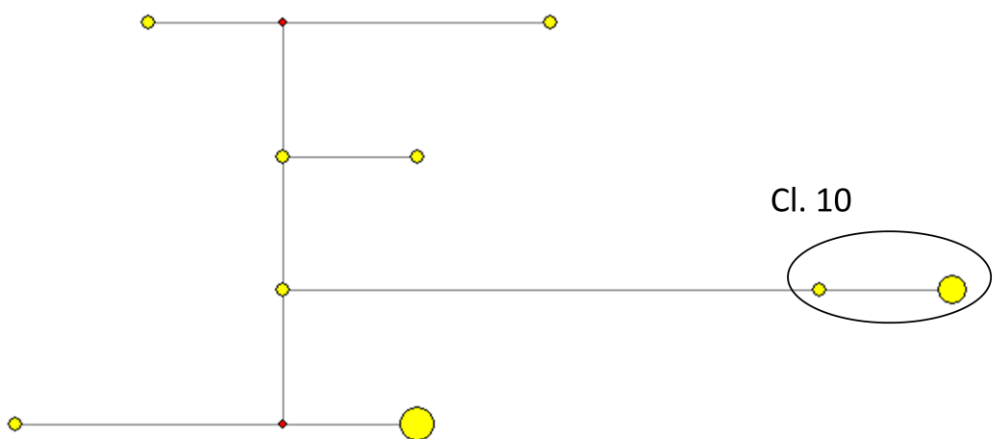



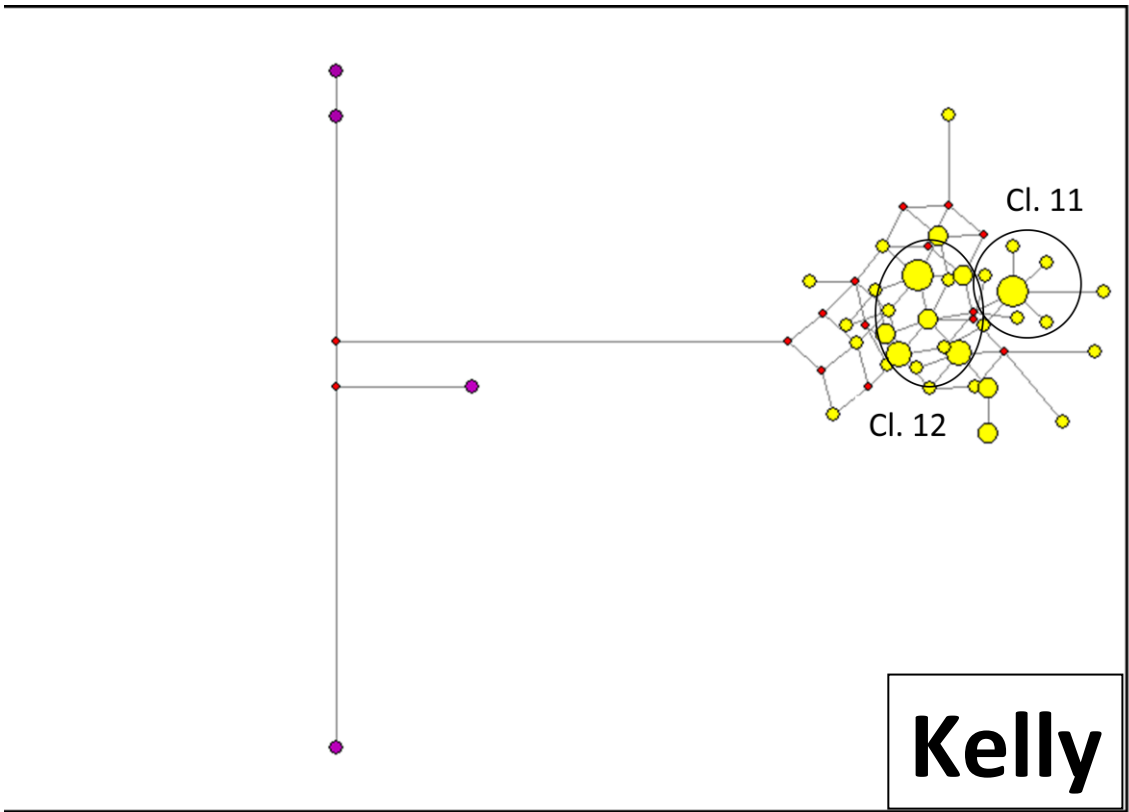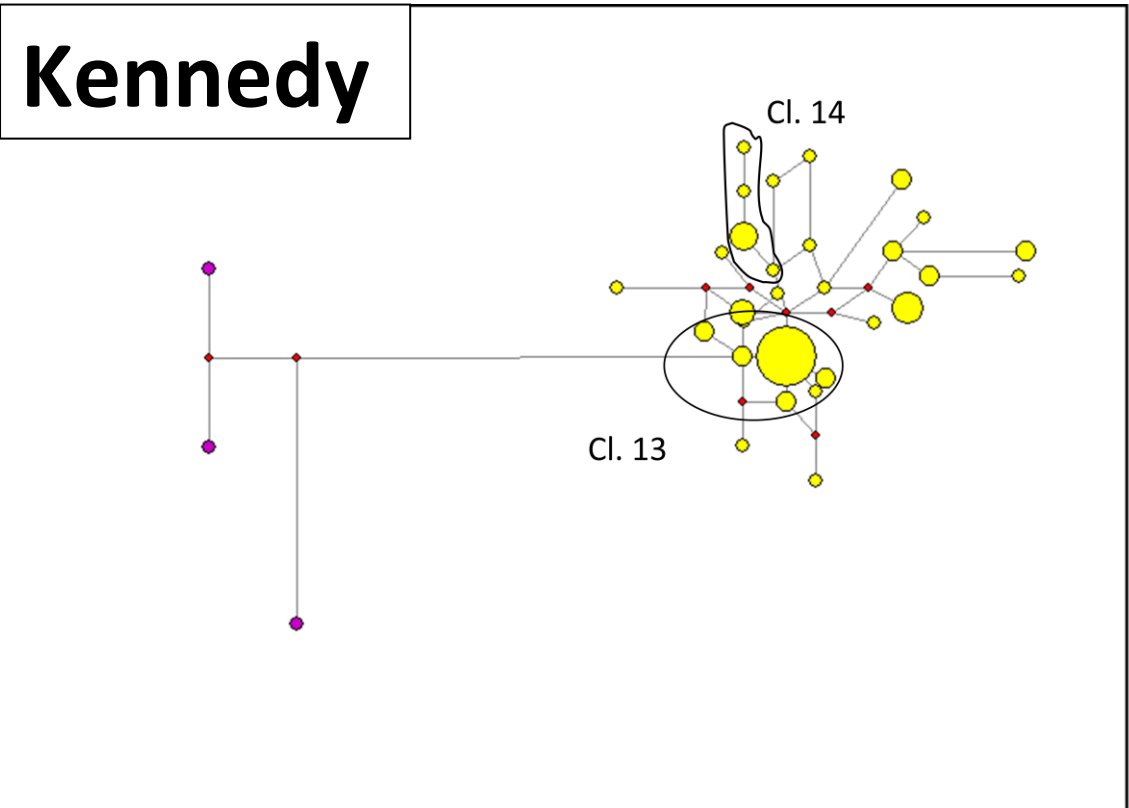

# McCarthy

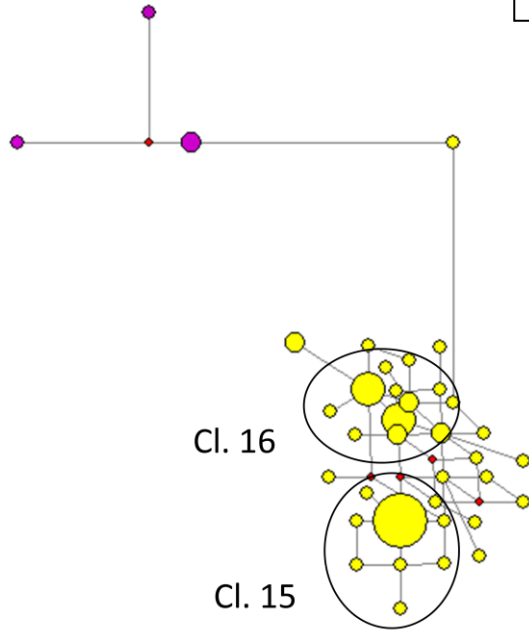

# McEvoy

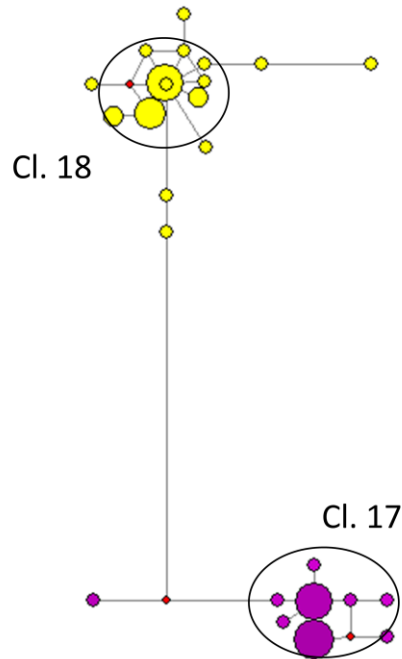

# McGillycuddy

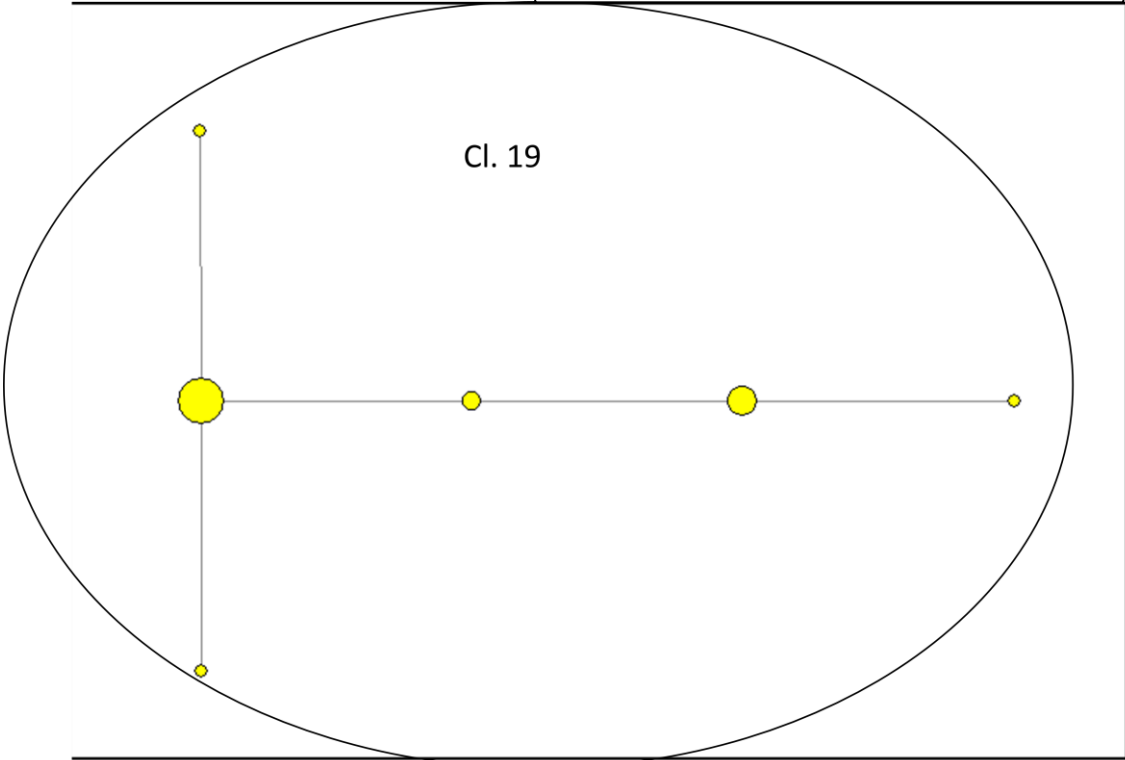

# McGinley

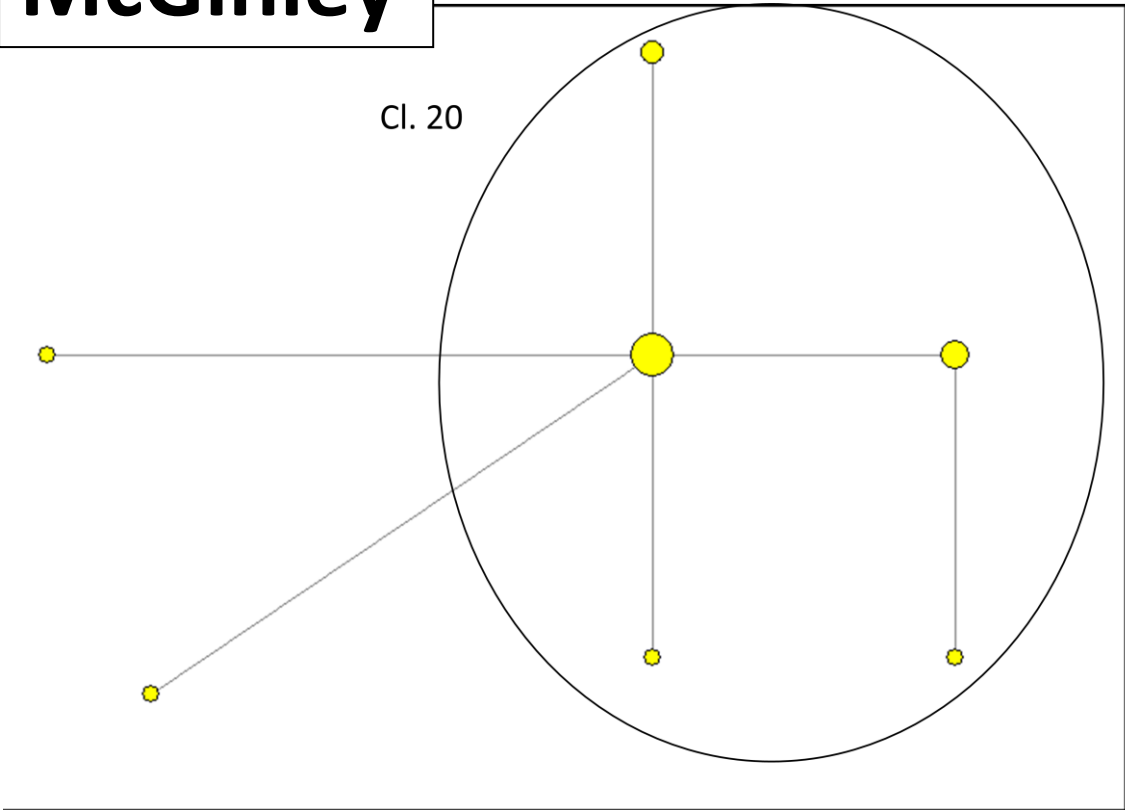

# McGinn

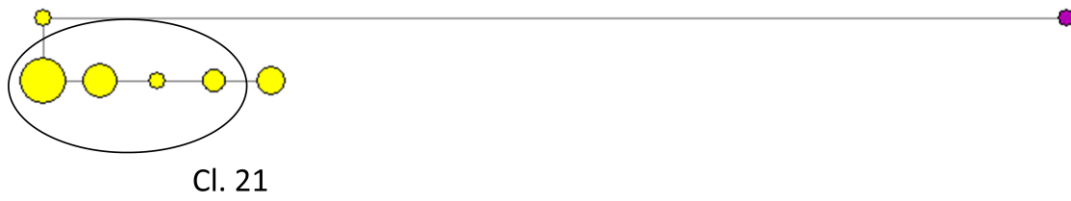

Cl. 26

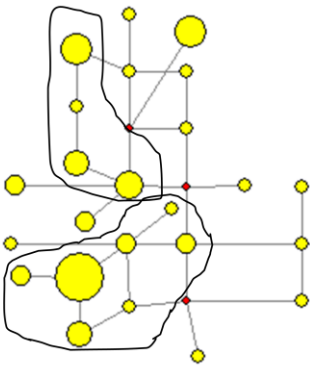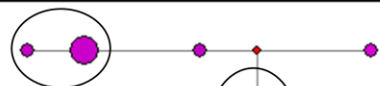

Cl. 24

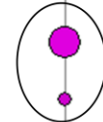

Cl. 23

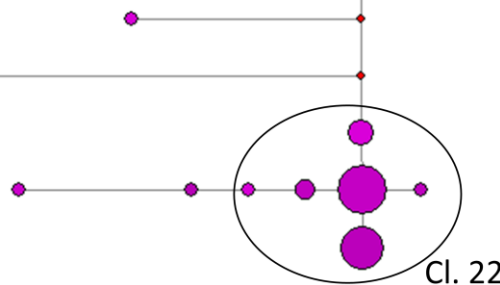

Cl. 22

# McGuinness

# Murphy

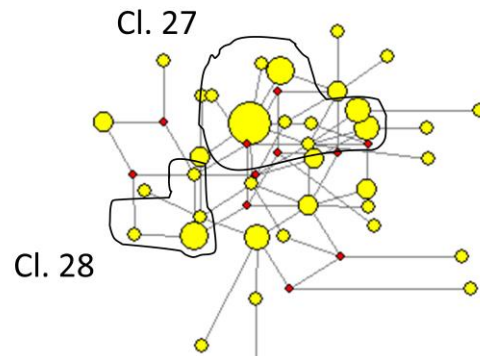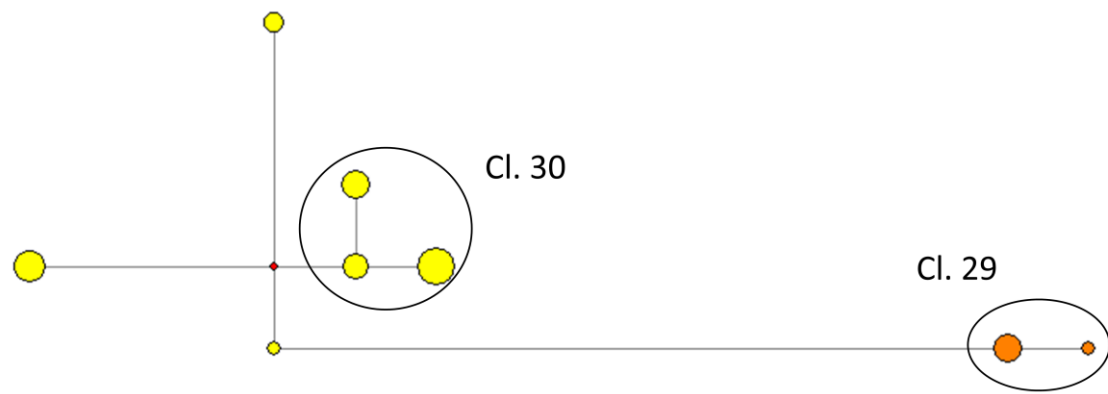

# O'Gara

**O'Hare**

Cl. 31

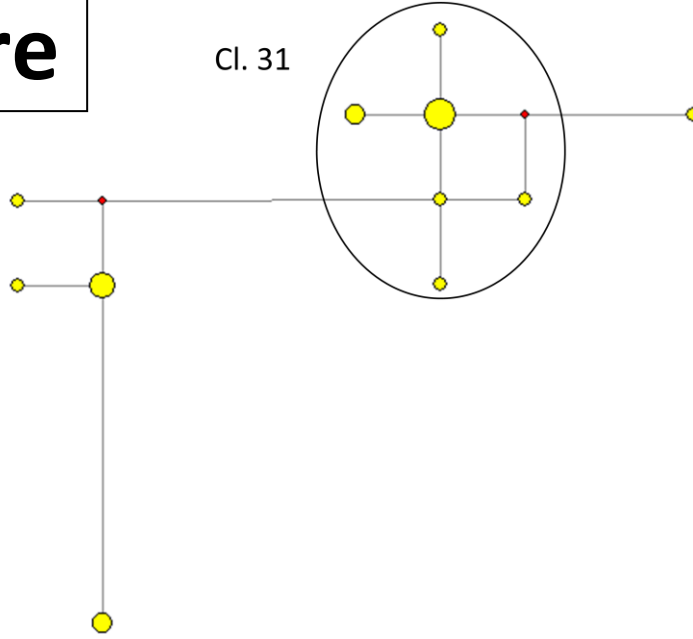

Cl. 32

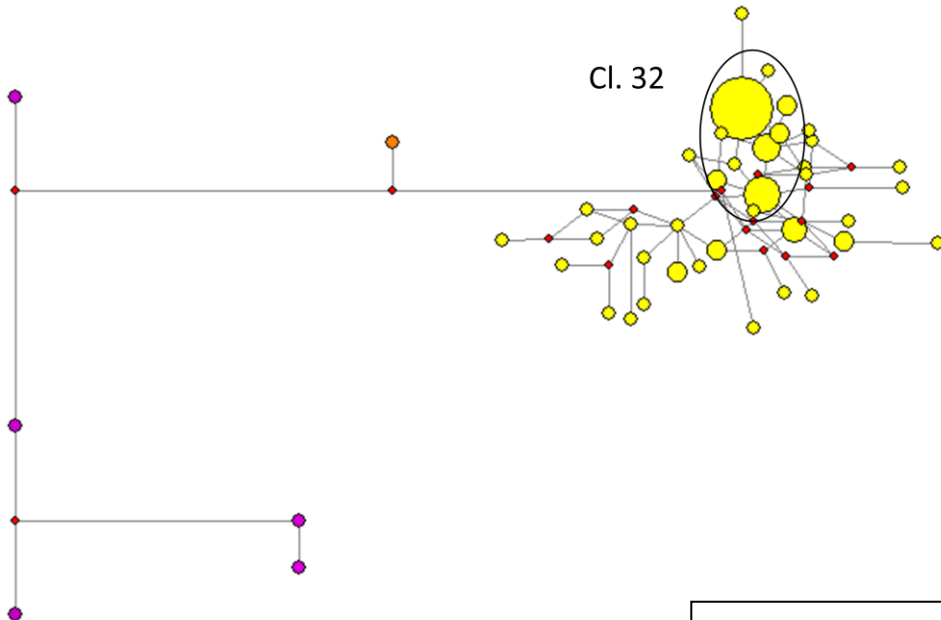

**O'Neill**

# O'Sullivan

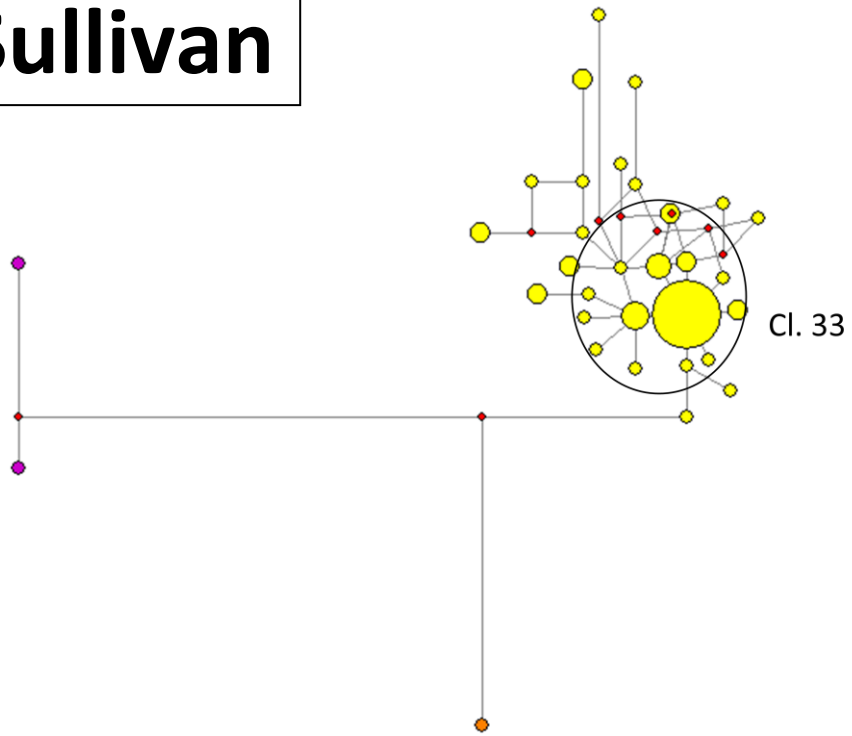

# Rooney

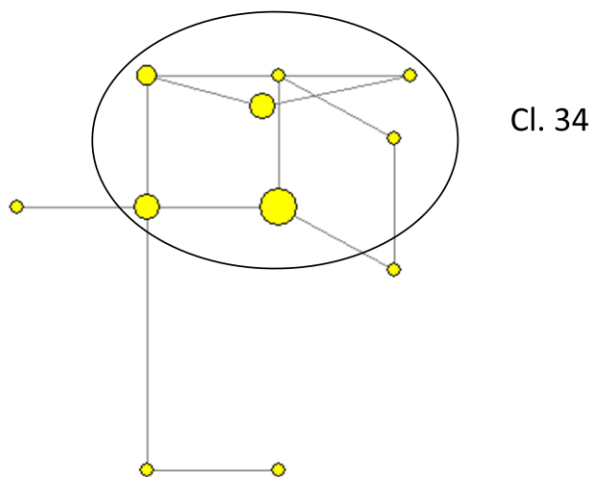

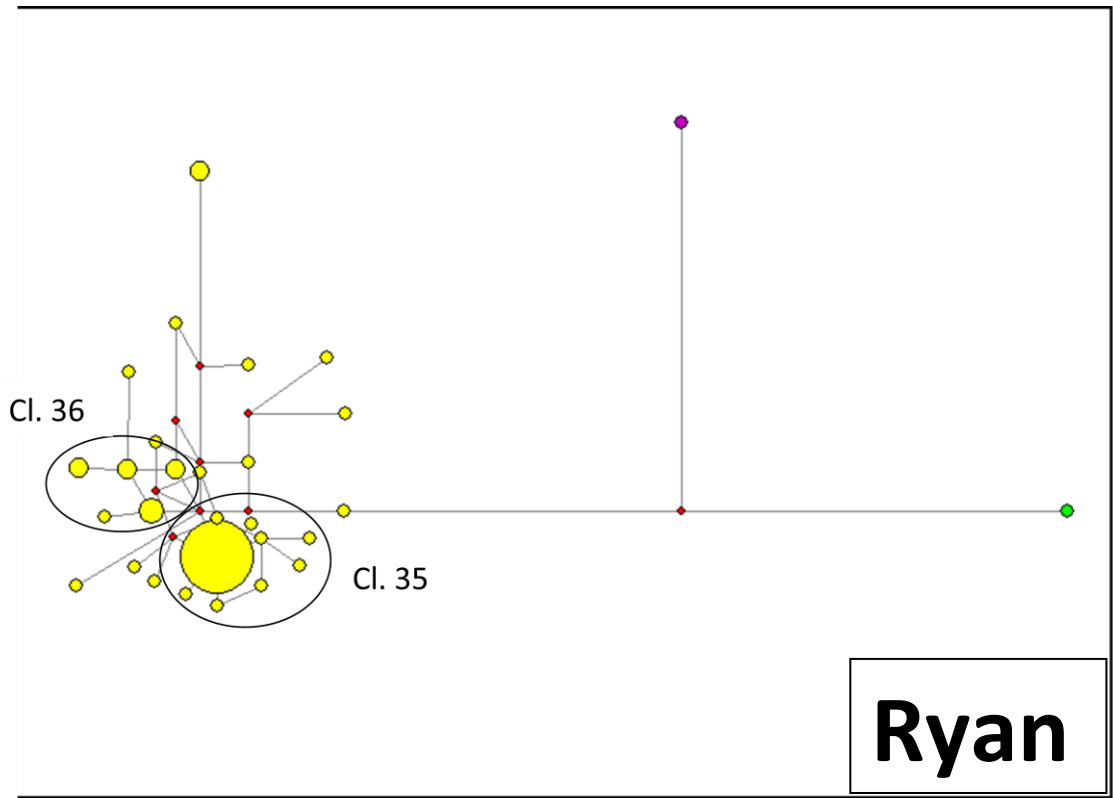



**Table 1 Suppl. Material: Descent clusters and estimated ages. Comparative data: SPAIN**

| Cluster | Surname    | Men in cluster | oASD* | MRCA         |         |       | TMRCA       |         |       |
|---------|------------|----------------|-------|--------------|---------|-------|-------------|---------|-------|
|         |            |                |       | T in gens.   | 95% CIs |       | 31 y/gen    | 95% CIs |       |
|         |            |                |       |              | Lower   | Upper |             | Lower   | Upper |
| 1       | Albiol     | 28             | 0.114 | <b>43.37</b> | 29.06   | 61.62 | <b>1344</b> | 901     | 1910  |
| 2       | Albiol     | 12             | 0.033 | <b>12.65</b> | 4.16    | 30.16 | <b>392</b>  | 129     | 935   |
| 3       | Alegre     | 15             | 0.047 | <b>17.71</b> | 7.74    | 35.30 | <b>549</b>  | 240     | 1094  |
| 4       | Alegre     | 8              | 0.025 | <b>9.49</b>  | 1.97    | 32.98 | <b>294</b>  | 61      | 1022  |
| 5       | Andreu     | 7              | 0.057 | <b>21.68</b> | 7.07    | 56.08 | <b>672</b>  | 219     | 1738  |
| 6       | Andreu     | 12             | 0.067 | <b>25.30</b> | 11.58   | 49.08 | <b>784</b>  | 359     | 1521  |
| 7       | Ansotegui  | 8              | 0.013 | <b>4.74</b>  | 0.75    | 23.43 | <b>147</b>  | 23      | 726   |
| 8       | Artola     | 12             | 0.042 | <b>15.81</b> | 6.10    | 34.74 | <b>490</b>  | 189     | 1077  |
| 9       | Artola     | 9              | 0.022 | <b>8.43</b>  | 1.51    | 26.42 | <b>261</b>  | 47      | 819   |
| 10      | Baigorri   | 13             | 0.031 | <b>11.68</b> | 4.14    | 28.25 | <b>362</b>  | 128     | 876   |
| 11      | Balaguer   | 9              | 0.011 | <b>4.22</b>  | 0.71    | 19.45 | <b>131</b>  | 22      | 603   |
| 12      | Bengoechea | 12             | 0.05  | <b>18.97</b> | 8.27    | 41.87 | <b>588</b>  | 256     | 1298  |
| 13      | Bengoechea | 6              | 0.017 | <b>6.32</b>  | 0.99    | 30.15 | <b>196</b>  | 31      | 935   |
| 14      | Benasar    | 18             | 0.039 | <b>14.76</b> | 6.25    | 28.82 | <b>457</b>  | 194     | 893   |
| 15      | Bibiloni   | 15             | 0.033 | <b>12.65</b> | 4.88    | 28.10 | <b>392</b>  | 151     | 871   |
| 16      | Boluda     | 17             | 0.035 | <b>13.39</b> | 5.40    | 28.22 | <b>415</b>  | 167     | 875   |
| 17      | Cadenas    | 21             | 0.086 | <b>32.53</b> | 19.00   | 52.93 | <b>1008</b> | 589     | 1641  |
| 18      | Cadenas    | 10             | 0.11  | <b>41.74</b> | 21.18   | 76.25 | <b>1294</b> | 657     | 2364  |
| 19      | Castell    | 28             | 0.032 | <b>12.20</b> | 5.95    | 22.68 | <b>378</b>  | 184     | 703   |
| 20      | Castell    | 9              | 0.056 | <b>21.08</b> | 8.07    | 48.10 | <b>654</b>  | 250     | 1491  |
| 21      | Gordon     | 10             | 0.01  | <b>3.80</b>  | 0.65    | 16.23 | <b>118</b>  | 20      | 503   |
| 22      | Gordon     | 14             | 0.114 | <b>43.37</b> | 24.75   | 72.86 | <b>1344</b> | 767     | 2259  |
| 23      | Granell    | 29             | 0.014 | <b>5.23</b>  | 1.66    | 12.59 | <b>162</b>  | 51      | 390   |
| 24      | Herrero    | 5              | 0.02  | <b>7.59</b>  | 1.34    | 40.38 | <b>235</b>  | 41      | 1252  |
| 25      | Huguet     | 16             | 0.063 | <b>23.72</b> | 11.95   | 42.15 | <b>735</b>  | 370     | 1307  |
| 26      | Japon      | 14             | 0.014 | <b>5.42</b>  | 1.17    | 18.23 | <b>168</b>  | 36      | 565   |
| 27      | Juarez     | 15             | 0.067 | <b>25.30</b> | 12.22   | 46.31 | <b>784</b>  | 379     | 1436  |
| 28      | Mateos     | 7              | 0.057 | <b>21.68</b> | 7.13    | 52.00 | <b>672</b>  | 221     | 1612  |
| 29      | Mateos     | 5              | 0.04  | <b>15.18</b> | 3.19    | 49.96 | <b>471</b>  | 99      | 1549  |
| 30      | Mateos     | 8              | 0.05  | <b>18.97</b> | 6.53    | 46.32 | <b>588</b>  | 203     | 1436  |
| 31      | Mateos     | 7              | 0.086 | <b>32.53</b> | 13.38   | 71.58 | <b>1008</b> | 415     | 2219  |
| 32      | Moliner    | 13             | 0.054 | <b>20.43</b> | 8.72    | 41.66 | <b>633</b>  | 270     | 1291  |
| 33      | Moliner    | 4              | 0.025 | <b>9.49</b>  | 1.47    | 45.27 | <b>294</b>  | 46      | 1403  |
| 34      | Moliner    | 17             | 0.088 | <b>33.48</b> | 18.82   | 56.04 | <b>1038</b> | 583     | 1737  |
| 35      | Olaizola   | 33             | 0.021 | <b>8.05</b>  | 3.47    | 16.13 | <b>250</b>  | 108     | 500   |
| 36      | Pascual    | 9              | 0.044 | <b>16.87</b> | 5.44    | 40.14 | <b>523</b>  | 169     | 1244  |
| 37      | Quevedo    | 5              | 0.02  | <b>7.59</b>  | 1.33    | 33.30 | <b>235</b>  | 41      | 1032  |
| 38      | Quevedo    | 9              | 0.067 | <b>25.30</b> | 10.85   | 54.63 | <b>784</b>  | 336     | 1694  |
| 39      | Renau      | 23             | 0.035 | <b>13.20</b> | 6.31    | 25.44 | <b>409</b>  | 195     | 789   |
| 40      | Renau      | 7              | 0.029 | <b>10.84</b> | 2.31    | 34.72 | <b>336</b>  | 71      | 1076  |
| 41      | Renau      | 7              | 0.043 | <b>16.26</b> | 4.11    | 45.46 | <b>504</b>  | 128     | 1409  |
| 42      | Renau      | 8              | 0.062 | <b>23.35</b> | 10.74   | 47.01 | <b>724</b>  | 333     | 1424  |

| Cluster     | Surname    | Men in cluster | oASD* | MRCA         | 95% CIs |       | TMRCA      | 95% CIs |       |
|-------------|------------|----------------|-------|--------------|---------|-------|------------|---------|-------|
|             |            |                |       | T in gens.   | Lower   | Upper | 31 y/gen   | Lower   | Upper |
| 43          | Ribalta    | 12             | 0.083 | <b>31.62</b> | 16.22   | 58.39 | <b>980</b> | 503     | 1810  |
| 44          | Ribalta    | 20             | 0.035 | <b>13.28</b> | 5.79    | 26.33 | <b>412</b> | 179     | 816   |
| 45          | Tirado     | 10             | 0.05  | <b>18.97</b> | 6.91    | 55.01 | <b>588</b> | 214     | 1705  |
| 46          | Valbuena   | 27             | 0.063 | <b>23.89</b> | 14.16   | 38.13 | <b>741</b> | 439     | 1182  |
| 47          | Valbuena   | 8              | 0.025 | <b>9.49</b>  | 1.91    | 30.55 | <b>294</b> | 59      | 947   |
| 48          | Villarroel | 16             | 0.025 | <b>9.49</b>  | 3.41    | 22.89 | <b>294</b> | 106     | 710   |
| 49          | Villarroel | 8              | 0.013 | <b>4.74</b>  | 0.82    | 22.66 | <b>147</b> | 26      | 702   |
| <b>Avg.</b> |            |                |       | <b>17.30</b> | 7.37    | 39.12 | <b>536</b> | 228     | 1212  |

TMRCA estimates differ from those in table 3 of the text due to fewer STRs, different cluster definitions, and different mutation rates. \* oASD: observed Average Square Distance (average square difference between a sample of chromosomes and the MRCA)

**Table 2 Suppl. Material: Descent clusters and estimated ages. Comparative data: BRITAIN**

| Cluster | Surname         | Men in cluster | oASD* | MRCA         | 95% CIs |       | TMRCA       | 95% CIs |       |
|---------|-----------------|----------------|-------|--------------|---------|-------|-------------|---------|-------|
|         |                 |                |       | T in gens.   | Lower   | Upper | 31 y/gen    | Lower   | Upper |
| 1       | Attenborough    | 26             | 0.015 | <b>5.84</b>  | 1.96    | 13.47 | <b>181</b>  | 61      | 417   |
| 2       | Beckham         | 16             | 0.138 | <b>52.18</b> | 31.84   | 83.90 | <b>1617</b> | 987     | 2601  |
| 3       | Butterfield     | 14             | 0.05  | <b>18.97</b> | 7.70    | 37.49 | <b>588</b>  | 239     | 1162  |
| 4       | Butterfield     | 17             | 0.065 | <b>24.55</b> | 12.48   | 44.55 | <b>761</b>  | 387     | 1381  |
| 5       | Clare           | 41             | 0.054 | <b>20.36</b> | 12.94   | 30.67 | <b>631</b>  | 401     | 951   |
| 6       | Clare           | 10             | 0.03  | <b>11.38</b> | 2.68    | 29.21 | <b>353</b>  | 83      | 906   |
| 7       | Clare           | 6              | 0.033 | <b>12.65</b> | 2.60    | 41.89 | <b>392</b>  | 81      | 1299  |
| 8       | Clare           | 5              | 0.05  | <b>18.97</b> | 5.61    | 52.33 | <b>588</b>  | 173     | 1622  |
| 9       | Clare           | 15             | 0.027 | <b>10.12</b> | 2.59    | 24.72 | <b>314</b>  | 80      | 766   |
| 10      | Clare           | 26             | 0.069 | <b>26.27</b> | 15.57   | 41.36 | <b>814</b>  | 483     | 1282  |
| 11      | Clemo           | 16             | 0.069 | <b>26.09</b> | 12.86   | 45.89 | <b>809</b>  | 399     | 1423  |
| 12      | Dalgleish       | 5              | 0.02  | <b>7.59</b>  | 1.10    | 34.70 | <b>235</b>  | 34      | 1076  |
| 13      | Dalgleish       | 22             | 0.055 | <b>20.70</b> | 10.86   | 36.30 | <b>642</b>  | 337     | 1125  |
| 14      | Feakes          | 5              | 0.02  | <b>7.59</b>  | 1.21    | 36.20 | <b>235</b>  | 37      | 1122  |
| 15      | Feakes          | 7              | 0.014 | <b>5.42</b>  | 0.89    | 23.45 | <b>168</b>  | 28      | 727   |
| 16      | Grewcock        | 20             | 0.015 | <b>5.69</b>  | 1.69    | 15.19 | <b>176</b>  | 52      | 471   |
| 17      | Grewcock        | 7              | 0.043 | <b>16.26</b> | 4.01    | 43.78 | <b>504</b>  | 124     | 1357  |
| 18      | Haythornthwaite | 32             | 0.013 | <b>4.74</b>  | 1.53    | 11.48 | <b>147</b>  | 48      | 356   |
| 19      | Herrick         | 17             | 0.018 | <b>6.70</b>  | 1.50    | 17.29 | <b>208</b>  | 47      | 536   |
| 20      | Jefferson       | 6              | 0.017 | <b>6.32</b>  | 1.20    | 27.16 | <b>196</b>  | 37      | 842   |
| 21      | Jefferson       | 14             | 0.121 | <b>46.08</b> | 26.55   | 76.42 | <b>1428</b> | 823     | 2369  |
| 22      | Jefferson       | 7              | 0.014 | <b>5.42</b>  | 0.92    | 25.03 | <b>168</b>  | 28      | 776   |
| 23      | Jefferson       | 8              | 0.038 | <b>14.23</b> | 3.52    | 37.84 | <b>441</b>  | 109     | 1173  |
| 24      | Jeffreys        | 9              | 0.022 | <b>8.43</b>  | 1.97    | 28.76 | <b>261</b>  | 61      | 892   |
| 25      | Jeffreys        | 5              | 0.02  | <b>7.59</b>  | 1.42    | 32.29 | <b>235</b>  | 44      | 1001  |
| 26      | Jeffreys        | 14             | 0.143 | <b>54.21</b> | 31.53   | 86.62 | <b>1680</b> | 977     | 2685  |

| Cluster     | Surname      | Men in cluster | oASD* | MRCA         | 95% CIs |        | TMRCA       | 95% CIs |       |
|-------------|--------------|----------------|-------|--------------|---------|--------|-------------|---------|-------|
|             |              |                |       | T in gens.   | Lower   | Upper  | 31 y/gen    | Lower   | Upper |
| 27          | Jobling      | 15             | 0.007 | <b>2.53</b>  | 0.43    | 10.97  | <b>78</b>   | 13      | 340   |
| 28          | Jobling      | 7              | 0.029 | <b>10.84</b> | 2.40    | 33.81  | <b>336</b>  | 74      | 1048  |
| 29          | Ketley       | 7              | 0.029 | <b>10.84</b> | 2.54    | 37.55  | <b>336</b>  | 79      | 1164  |
| 30          | Ketley       | 26             | 0.012 | <b>4.38</b>  | 1.31    | 11.86  | <b>136</b>  | 41      | 368   |
| 31          | Lauder       | 8              | 0.063 | <b>23.72</b> | 8.82    | 54.18  | <b>735</b>  | 273     | 1679  |
| 32          | Northam      | 5              | 0.02  | <b>7.59</b>  | 1.37    | 34.38  | <b>235</b>  | 42      | 1066  |
| 33          | Northam      | 27             | 0.104 | <b>39.35</b> | 25.31   | 57.35  | <b>1220</b> | 785     | 1778  |
| 34          | Pitchford    | 9              | 0.056 | <b>21.08</b> | 7.35    | 47.34  | <b>654</b>  | 228     | 1468  |
| 35          | Pitchford    | 26             | 0.019 | <b>7.30</b>  | 2.80    | 16.09  | <b>226</b>  | 87      | 499   |
| 36          | R.           | 7              | 0.043 | <b>16.26</b> | 4.30    | 47.07  | <b>504</b>  | 133     | 1459  |
| 37          | Ravenscroft  | 14             | 0.029 | <b>10.84</b> | 3.78    | 26.76  | <b>336</b>  | 117     | 829   |
| 38          | Ravenscroft  | 21             | 0.095 | <b>36.14</b> | 21.33   | 56.18  | <b>1120</b> | 661     | 1742  |
| 39          | Secker       | 11             | 0.046 | <b>17.25</b> | 6.42    | 42.12  | <b>535</b>  | 199     | 1306  |
| 40          | Slingsby     | 11             | 0.055 | <b>20.70</b> | 8.80    | 42.92  | <b>642</b>  | 273     | 1331  |
| 41          | Slingsby     | 21             | 0.086 | <b>32.53</b> | 19.54   | 51.77  | <b>1008</b> | 606     | 1605  |
| 42          | Slinn        | 14             | 0.079 | <b>29.82</b> | 15.51   | 52.66  | <b>924</b>  | 481     | 1633  |
| 43          | Slinn        | 6              | 0.017 | <b>6.32</b>  | 1.08    | 27.29  | <b>196</b>  | 33      | 846   |
| 44          | Starbuck     | 16             | 0.044 | <b>16.60</b> | 7.34    | 32.99  | <b>515</b>  | 227     | 1023  |
| 45          | Stead        | 6              | 0.033 | <b>12.65</b> | 2.81    | 41.50  | <b>392</b>  | 87      | 1287  |
| 46          | Stead        | 13             | 0.031 | <b>11.68</b> | 3.95    | 28.19  | <b>362</b>  | 122     | 874   |
| 47          | Stead        | 6              | 0.05  | <b>18.97</b> | 5.62    | 52.30  | <b>588</b>  | 174     | 1621  |
| 48          | Stead        | 8              | 0.064 | <b>24.27</b> | 11.23   | 47.85  | <b>752</b>  | 348     | 1483  |
| 49          | Stribling    | 21             | 0.138 | <b>52.40</b> | 34.24   | 76.45  | <b>1624</b> | 1061    | 2370  |
| 50          | Swindlehurst | 41             | 0.055 | <b>20.87</b> | 13.35   | 31.28  | <b>647</b>  | 414     | 970   |
| 51          | Titchmarsh   | 14             | 0.036 | <b>13.55</b> | 4.92    | 30.25  | <b>420</b>  | 153     | 938   |
| 52          | Titmus       | 12             | 0.008 | <b>3.16</b>  | 0.59    | 15.60  | <b>98</b>   | 18      | 484   |
| 53          | Wadsworth    | 14             | 0.021 | <b>8.13</b>  | 2.55    | 21.59  | <b>252</b>  | 79      | 669   |
| 54          | Werrett      | 19             | 0.021 | <b>7.99</b>  | 2.79    | 19.39  | <b>248</b>  | 87      | 601   |
| 55          | Werrett      | 31             | 0.073 | <b>27.60</b> | 17.53   | 41.50  | <b>856</b>  | 543     | 1287  |
| 56          | Widdowson    | 7              | 0.014 | <b>5.42</b>  | 0.92    | 25.74  | <b>168</b>  | 28      | 798   |
| 57          | Widdowson    | 14             | 0.013 | <b>4.65</b>  | 1.10    | 17.36  | <b>144</b>  | 34.5    | 538   |
| 58          | Winstone     | 12             | 0.008 | <b>3.16</b>  | 0.60    | 13.67  | <b>98</b>   | 18      | 424   |
| 59          | Winstone     | 10             | 0.18  | <b>68.30</b> | 38.97   | 115.43 | <b>2117</b> | 1208    | 3578  |
| 60          | Wordsworth   | 13             | 0.039 | <b>14.60</b> | 5.18    | 31.69  | <b>452</b>  | 161     | 982   |
| <b>Avg.</b> |              |                |       | <b>17.60</b> | 8.09    | 37.85  | <b>545</b>  | 254     | 1173  |

TMRCA estimates may differ from those previously published in British samples due to fewer STRs, different cluster definitions, and different mutation rates. \* oASD: observed Average Square Distance (average square difference between a sample of chromosomes and the MRCA)

**Table 3 Suppl. Material: Descent clusters and estimated ages. Comparative data: IRELAND**

| Cluster     | Surname     | Men in cluster | oASD* | MRCA         | 95% CIs |       | TMRCA       | 95% CIs |       |
|-------------|-------------|----------------|-------|--------------|---------|-------|-------------|---------|-------|
|             |             |                |       | T in gens.   | Lower   | Upper | 31 y/gen    | Lower   | Upper |
| 1           | Bradley     | 7              | 0.014 | <b>5.42</b>  | 0.96    | 25.61 | <b>168</b>  | 30      | 794   |
| 2           | Bradley     | 11             | 0.064 | <b>24.15</b> | 10.13   | 50.30 | <b>749</b>  | 314     | 1559  |
| 3           | Byrne       | 22             | 0.05  | <b>18.97</b> | 9.76    | 33.70 | <b>588</b>  | 303     | 1045  |
| 4           | Byrne       | 9              | 0.067 | <b>25.30</b> | 9.64    | 52.92 | <b>784</b>  | 299     | 1641  |
| 5           | Donohoe     | 14             | 0.064 | <b>24.39</b> | 12.34   | 45.40 | <b>756</b>  | 382     | 1408  |
| 6           | Donohoe     | 22             | 0.091 | <b>34.50</b> | 20.97   | 54.99 | <b>1069</b> | 650     | 1705  |
| 7           | Donohoe     | 14             | 0.05  | <b>18.97</b> | 7.78    | 38.51 | <b>588</b>  | 241     | 1194  |
| 8           | Egan        | 14             | 0.136 | <b>51.50</b> | 29.91   | 81.67 | <b>1596</b> | 927     | 2532  |
| 9           | Haughey     | 10             | 0.05  | <b>18.97</b> | 6.99    | 42.32 | <b>588</b>  | 217     | 1312  |
| 10          | Heaney      | 5              | 0.02  | <b>7.59</b>  | 1.29    | 36.00 | <b>235</b>  | 40      | 1116  |
| 11          | Kelly       | 10             | 0.06  | <b>22.77</b> | 9.07    | 48.13 | <b>706</b>  | 281     | 1492  |
| 12          | Kelly       | 19             | 0.105 | <b>39.94</b> | 24.09   | 62.94 | <b>1238</b> | 747     | 1951  |
| 13          | Kennedy     | 28             | 0.046 | <b>17.62</b> | 9.62    | 29.96 | <b>546</b>  | 298     | 929   |
| 14          | Kennedy     | 7              | 0.086 | <b>32.53</b> | 12.90   | 74.98 | <b>1008</b> | 400     | 2324  |
| 15          | McCarthy    | 21             | 0.048 | <b>18.07</b> | 9.15    | 32.47 | <b>560</b>  | 284     | 1007  |
| 16          | McCarthy    | 24             | 0.129 | <b>49.01</b> | 32.77   | 71.33 | <b>1519</b> | 1016    | 2211  |
| 17          | McEvoy      | 20             | 0.09  | <b>34.15</b> | 20.71   | 55.33 | <b>1059</b> | 642     | 1715  |
| 18          | McEvoy      | 18             | 0.072 | <b>27.41</b> | 14.87   | 47.54 | <b>850</b>  | 461     | 1474  |
| 19          | McGilycuddy | 20             | 0.07  | <b>26.56</b> | 15.09   | 45.01 | <b>823</b>  | 468     | 1395  |
| 20          | McGinley    | 13             | 0.062 | <b>23.35</b> | 10.71   | 47.09 | <b>724</b>  | 332     | 1460  |
| 21          | McGinn      | 14             | 0.114 | <b>43.37</b> | 24.45   | 70.91 | <b>1344</b> | 758     | 2198  |
| 22          | McGuinness  | 28             | 0.061 | <b>23.04</b> | 13.50   | 36.38 | <b>714</b>  | 419     | 1128  |
| 23          | McGuinness  | 6              | 0.017 | <b>6.32</b>  | 1.04    | 31.78 | <b>196</b>  | 32      | 985   |
| 24          | McGuinness  | 5              | 0.02  | <b>7.59</b>  | 1.47    | 36.01 | <b>235</b>  | 46      | 1116  |
| 25          | McGuinness  | 23             | 0.083 | <b>31.35</b> | 18.71   | 49.84 | <b>972</b>  | 580     | 1545  |
| 26          | McGuinness  | 13             | 0.154 | <b>58.38</b> | 35.20   | 94.17 | <b>1810</b> | 1091    | 2919  |
| 27          | Murphy      | 28             | 0.111 | <b>42.01</b> | 27.86   | 60.16 | <b>1302</b> | 864     | 1865  |
| 28          | Murphy      | 6              | 0.033 | <b>12.65</b> | 2.55    | 40.62 | <b>392</b>  | 79      | 1259  |
| 29          | O'Gara      | 5              | 0.02  | <b>7.59</b>  | 1.37    | 35.37 | <b>235</b>  | 43      | 1096  |
| 30          | O'Gara      | 14             | 0.079 | <b>29.82</b> | 15.68   | 53.24 | <b>924</b>  | 486     | 1650  |
| 31          | O'Hare      | 10             | 0.06  | <b>22.77</b> | 9.09    | 49.14 | <b>706</b>  | 282     | 1523  |
| 32          | O'Neill     | 41             | 0.095 | <b>36.10</b> | 25.47   | 50.41 | <b>1119</b> | 790     | 1563  |
| 33          | O'Sullian   | 43             | 0.061 | <b>22.94</b> | 15.81   | 33.95 | <b>711</b>  | 490     | 1052  |
| 34          | Rooney      | 18             | 0.117 | <b>44.27</b> | 26.35   | 69.83 | <b>1372</b> | 817     | 2165  |
| 35          | Ryan        | 35             | 0.034 | <b>13.01</b> | 7.16    | 21.94 | <b>403</b>  | 222     | 680   |
| 36          | Ryan        | 10             | 0.11  | <b>41.23</b> | 24.37   | 66.45 | <b>1278</b> | 756     | 2060  |
| <b>Avg.</b> |             |                |       | <b>26.76</b> | 14.41   | 49.34 | <b>829</b>  | 447     | 1529  |

TMRCA estimates may differ from those previously published in Irish samples due to fewer STRs, different cluster definitions, and different mutation rates. \* oASD: observed Average Square Distance (average square difference between a sample of chromosomes and the MRCA)
